# Supplementary material
Source: publisher figshare collection journal article supplement (https://acs.figshare.com/ndownloader/files/4531999)
Supplement: Supplementary file 1 [file 4531999]

# **A Zn(II) Catalyzed Synthesis of Piperidines from Propargyl Amines and Cyclopropanes**

## **Supporting Information**

Terry P. Lebold, Andrew B. Leduc, and Michael A. Kerr\*

*The University of Western Ontario, Department of Chemistry,  
London, Ontario, Canada N6A 5B7*

## **Table of Contents**

|                                                   |                         |
|---------------------------------------------------|-------------------------|
| General Experimental                              | <i>page</i> S-2         |
| Experimental procedures and characterization data | <i>page</i> S-2 – S-10  |
| Spectra                                           | <i>page</i> S-11 – S-50 |

## Experimental

### General

Infrared spectra were obtained as thin films on NaCl plates using a Bruker Vector 33 FT-IR instrument. NMR experiments were performed on Varian Mercury 400, Varian Inova 600 and Inova 400 instruments and samples were obtained in CDCl<sub>3</sub> (referenced to 7.26 ppm for <sup>1</sup>H and 77.0 ppm for <sup>13</sup>C). <sup>19</sup>F spectra were externally referenced to neat trifluorotoluene (referenced to -63.9 ppm). Coupling constants (J) are in Hz. The multiplicities of the signals are described using the following abbreviations: s = singlet, d = doublet, t = triplet, q = quartet, sept = septuplet, m = multiplet, br = broad. High resolution mass spectra (HRMS) were obtained on a Finnigan MAT 8200 spectrometer at 70 eV. Optical rotations were recorded in cells of 10 cm path length using a Perkin-Elmer 241 digital polarimeter.

All reagents and solvents were used as purchased from Aldrich, Strem, Caledon or VWR. Reaction progress was followed by thin layer chromatography (TLC) (EM Science, silica gel 60 F<sub>254</sub>) visualizing with UV light, and the plates developed using acidic anisaldehyde. Flash chromatography was performed using silica gel purchased from Silicycle Chemical Division Inc. (230-400 mesh).

**General Experimental Procedure A:** 1,1-cyclopropane diester (1 equivalent), N-benzylprop-2-yn-1-amine (1.5 equivalent) and zinc(II) bistriflamide (0.1 equivalent) were dissolved in 3 ml benzene. A reflux condenser was attached and the vessel purged with Argon and the reaction was brought to reflux. Upon completion by TLC analysis a small amount of Li<sub>2</sub>CO<sub>3</sub> was added to the reaction mixture which was then preabsorbed on silica and purified by flash chromatography (EtOAc/Hexanes) to yield the desired piperidines.

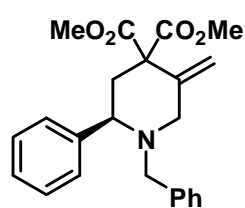

**Piperidine 4a**

Piperidine **4a** was prepared using general experimental procedure A. Reagents employed: (R)-dimethyl 2-phenylcyclopropane-1,1-dicarboxylate (106 mg, 0.453 mmol, 98% *ee*), N-benzylprop-2-yn-1-amine (99 mg, 0.682 mmol) and zinc(II) bistriflamide (28 mg, 0.0447 mmol). Piperidine **4a** (165 mg, 0.435 mmol, 96%, 96% *ee*) was obtained as a pale yellow oil: *R*<sub>f</sub> = 0.44, 20% EtOAc in hexanes; <sup>1</sup>H-NMR (400 MHz, CDCl<sub>3</sub>): δ = 7.51-7.47 (m, 2H), 7.39-7.33 (m, 2H), 7.32-7.20 (m, 6H), 5.06 (d, *J* = 1.2 Hz, 1H), 4.79 (s, 1H), 3.86 (s, 3H), 3.81 (d, *J* = 13.2 Hz, 1H), 3.77 (s, 3H), 3.43 (d, *J* = 13.2 Hz, 1H), 3.30 (X of ABX system, *J* = 12.1, 2.3 Hz, 1H), 2.86 (d, *J* = 13.2 Hz, 1H), 2.83 (d, *J* = 13.2 Hz, 1H), 2.54 (A of ABX system, *J* = 13.7, 2.3 Hz, 1H), 2.44 (B of ABX system, *J* = 13.7, 12.1 Hz, 1H); <sup>13</sup>C NMR (100 MHz, CDCl<sub>3</sub>) δ = 170.2, 170.1, 142.7, 140.5, 138.7, 128.7, 128.5, 128.2, 127.5, 126.8, 113.4, 65.0, 61.3, 58.9, 57.5, 52.9, 52.6, 41.2 (note: 1 *sp*<sup>2</sup> carbon is missing presumably due to overlap); IR (thin film): 3086, 3063, 3029, 3004, 2952, 2838, 2795, 1735, 1654, 1604, 1495, 1453, 1436, 1373, 1361, 1321, 1307, 1262, 1244, 1213, 1139, 1116, 1086, 1061, 1030, 1019, 983, 914770, 741, 701; HRMS calc'd for C<sub>23</sub>H<sub>25</sub>NO<sub>4</sub> = 379.1784, found = 379.1774; [*α*]<sub>D</sub> = -70.4 (*c* = 0.746, CH<sub>2</sub>Cl<sub>2</sub>).

The enantiomeric excess was determined to be 96% by chiral HPLC, Chiralcel OD-H, 250 x 4.6 mm<sup>2</sup>, Diacel Chemical Industries; 96:4 Hexanes / *i*PrOH at 1.5 mL/min; 220 nm; The retention time for the enantiomers were *r*<sub>t</sub>(+) = 3.89 min, *r*<sub>t</sub>(-) = 5.03 min.

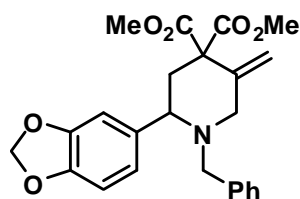

**Piperidine 4b**

Piperidine **4b** was prepared using general experimental procedure A. Reagents employed: dimethyl 2-(benzo[d][1,3]dioxol-5-yl)cyclopropane-1,1-dicarboxylate (100 mg, 0.359 mmol), N-benzylprop-2-yn-1-amine (78 mg, 0.537 mmol), and zinc(II) bistriflamide (22 mg, 0.0352 mmol). Piperidine **4b** (144 mg, 0.340 mmol, 95%) was obtained as a colorless foam: *R*<sub>f</sub> = 0.33, 20% EtOAc in hexanes; <sup>1</sup>H-NMR (400 MHz, CDCl<sub>3</sub>): δ = 7.31-7.19 (m, 5H), 7.03 (d, *J* = 1.6 Hz, 1H), 6.87 (dd, *J* = 8.0, 1.6 Hz, 1H), 6.76 (d, *J* = 8.0 Hz, 1H), 5.94 (AB, 2H), 5.03 (d, *J* = 0.8 Hz, 1H), 4.75 (s, 1H), 3.83 (s, 3H), 3.82 (d partially obscured by s at 3.83 ppm, *J* = 12.8 Hz, 1H), 3.76 (s, 3H), 3.38 (d, *J* = 12.8 Hz, 1H), 3.19 (X of ABX system, *J* = 12.2, 2.5 Hz, 1H), 2.80 (d, *J* = 13.2 Hz, 1H), 2.79 (d, *J* = 13.2 Hz, 1H), 2.49 (A of ABX system, *J* = 13.6, 2.5 Hz, 1H), 2.37 (B of ABX system, 13.6, 12.2 Hz, 1H); <sup>13</sup>C NMR (100 MHz, CDCl<sub>3</sub>) δ = 170.2, 170.1, 148.0, 146.9, 140.5, 138.7, 136.7, 128.5, 128.2, 126.8, 120.9, 113.4, 108.2, 107.5, 101.0, 64.8, 61.3, 58.8, 57.6, 52.9, 52.7, 41.3; IR (thin film): 3086, 3063, 3027, 3002, 2952, 2894, 2840, 2794, 1734, 1654, 1609, 1503, 1486, 1439, 1385, 1324, 1246, 1208, 1145, 1113, 1078, 1064, 1039, 1020, 983, 935, 915, 870, 812, 795, 740, 780, 700; HRMS calc'd for C<sub>24</sub>H<sub>25</sub>NO<sub>6</sub> = 423.1682, found = 423.1687.

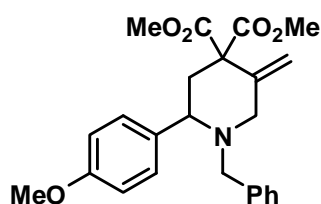

**Piperidine 4c**

Piperidine **4c** was prepared using general experimental procedure A. Reagents employed: dimethyl 2-(4-methoxyphenyl)cyclopropane-1,1-dicarboxylate (116 mg, 0.439 mmol), N-benzylprop-2-yn-1-amine (96 mg, 0.661 mmol), and zinc(II) bistriflamide (27 mg, 0.0432 mmol). Piperidine **4c** (171 mg, 0.418 mmol, 95%) was obtained as a pale yellow sticky solid: *R*<sub>f</sub> = 0.33, 20% EtOAc in hexanes; <sup>1</sup>H-NMR (400 MHz, CDCl<sub>3</sub>): δ = 7.40-7.36 and 6.90-6.86 (m, AA'BB', 4H), 7.30-7.18 (m, 5H) 7.03 (d, *J* = 1.2 Hz, 1H) 4.76 (s, 1H), 3.84 (s, 3H), 3.79 (s, 3H), 3.78 (d obscured by s at 3.79 and 3.76 ppm, *J* = 12.8, 1H), 3.76 (s, 3H), 3.39 (d, *J* = 12.8 Hz, 1H), 3.23 (X of ABX system, *J* = 11.9, 2.5 Hz, 1H), 2.82 (d, *J* = 12.4 Hz, 1H), 2.78 (d, *J* = 12.4 Hz, 1H), 2.50 (A of ABX system, *J* = 13.6, 2.5 Hz, 1H), 2.40 (B of ABX system, *J* = 13.6, 11.9 Hz, 1H); <sup>13</sup>C NMR (100 MHz, CDCl<sub>3</sub>) δ = 170.3, 170.2, 158.9, 140.6, 138.8, 134.7, 128.53, 128.47, 128.1, 126.8, 114.0, 113.3, 64.3, 61.3, 58.7, 57.6, 55.2, 52.9, 52.6, 41.2; IR (thin film): 3088, 3062, 3029, 3000, 2953, 2910, 2837, 2802, 1735, 1654, 1612, 1586, 1513, 1495, 1454, 1437, 1373, 1322, 1302, 1245, 1179, 1139, 1110, 1078, 1064, 1033, 915, 835, 773, 742, 699; HRMS calc'd for C<sub>24</sub>H<sub>27</sub>NO<sub>5</sub> = 409.1889, found = 409.1880.

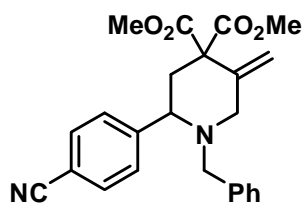

**Piperidine 4d**

Piperidine **4d** was prepared using general experimental procedure A with modifications to the equivalency of reagents. Reagents employed: dimethyl 2-(4-cyanophenyl)cyclopropane-1,1-dicarboxylate (150 mg, 0.579 mmol), N-benzylprop-2-yn-1-amine (252 mg, 1.735 mmol), and

zinc(II) bistriflamide (109 mg, 0.174 mmol). Piperidine **4d** (187 mg, 0.462 mmol, 80%) was obtained as a yellow sticky solid:  $R_f$  = 0.19, 20% EtOAc in hexanes;  $^1\text{H-NMR}$  (400 MHz,  $\text{CDCl}_3$ ):  $\delta$  = 7.67-7.59 (m, AA'BB', 4H), 7.32-7.21 (m, 5H), 5.07 (s, 1H), 4.80 (s, 1H), 3.85 (s, 3H), 3.76 (s, 3H), 3.66 (d,  $J$  = 13.4 Hz, 1H), 3.42 (d,  $J$  = 13.4 Hz, 1H), 3.37 (X of ABX system,  $J$  = 13.1, 2.5 Hz, 1H), 2.87 (d,  $J$  = 10.0 Hz, 1H), 2.83 (d,  $J$  = 10.0 Hz, 1H), 2.49 (A of ABX system,  $J$  = 13.3, 2.5 Hz, 1H), 2.33 (B of ABX,  $J$  = 13.3, 13.1 Hz, 1H);  $^{13}\text{C NMR}$  (100 MHz,  $\text{CDCl}_3$ )  $\delta$  = 170.0, 169.8, 148.5, 139.8, 137.9, 132.6, 128.34, 128.32, 127.1, 118.7, 113.9, 111.5, 64.7, 61.0, 59.1, 57.3, 53.1, 52.8, 41.0 (note: 1 carbon is missing presumably due to overlap); IR (thin film): 3087, 3062, 3030, 3003, 2953, 2841, 2803, 2228, 1735, 1656, 1608, 1495, 1453, 1436, 1376, 1360, 1322, 1270, 1245, 1213, 1138, 1115, 1077, 1065, 1020, 916, 843, 785, 741, 699; HRMS calc'd for  $\text{C}_{24}\text{H}_{24}\text{N}_2\text{O}_4$  = 404.1736, found = 404.1720.

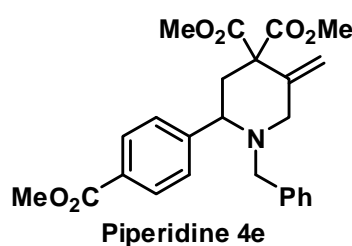

Piperidine **4e** was prepared using general experimental procedure A with modifications to the equivalency of reagents. Reagents employed: dimethyl 2-(4-(methoxycarbonyl)phenyl)cyclopropane-1,1-dicarboxylate (150 mg, 0.513 mmol), N-benzylprop-2-yn-1-amine (224 mg, 1.543 mmol), and zinc(II) bistriflamide (96 mg, 0.153 mmol). Piperidine **4e** (209 mg, 0.478 mmol, 93%) was obtained as a pale yellow sticky solid:  $R_f$  = 0.23, 20% EtOAc in hexanes;  $^1\text{H-NMR}$  (400 MHz,  $\text{CDCl}_3$ ):  $\delta$  = 8.05-8.01 and 7.59-7.55 (m, AA'BB', 4H), 7.31-7.20 (m, 5H), 5.06 (d,  $J$  = 1.2 Hz, 1H), 4.79 (s, 1H), 3.91 (s, 3H), 3.86 (s, 3H), 3.76 (s, 3H), 3.73 (d,  $J$  = 13.2 Hz, 1H), 3.42 (d,  $J$  = 13.2 Hz, 1H), 3.35 (X of ABX system,  $J$  = 11.8, 2.5 Hz, 1H), 2.88 (d,  $J$  = 13.2 Hz, 1H), 2.84 (d,  $J$  = 13.2 Hz, 1H), 2.51 (A of ABX system,  $J$  = 13.6, 2.5 Hz, 1H), 2.39 (B of ABX system,  $J$  = 13.6, 11.8 Hz, 1H);  $^{13}\text{C NMR}$  (100 MHz,  $\text{CDCl}_3$ )  $\delta$  = 170.1, 170.0, 166.8, 148.2, 140.2, 138.3, 130.1, 129.5, 128.5, 128.3, 127.6, 127.0, 113.7, 64.8, 61.2, 59.1, 57.4, 53.0, 52.7, 52.1, 41.0; IR (thin film): 3088, 3063, 3029, 3001, 2953, 2842, 2803, 1726, 1657, 1611, 1495, 1452, 1435, 1416, 1374, 1358, 1309, 1277, 1244, 1214, 1196, 1177, 1139, 1113, 1077, 1065, 1019, 970, 915, 859, 820, 776, 741, 700; HRMS calc'd for  $\text{C}_{25}\text{H}_{27}\text{NO}_6$  = 437.1838, found = 437.1826.

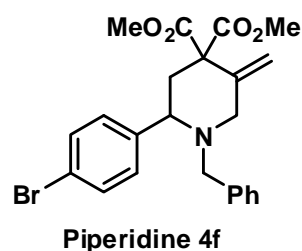

Piperidine **4f** was prepared using general experimental procedure A. Reagents employed: dimethyl 2-(4-bromophenyl)cyclopropane-1,1-dicarboxylate (100 mg, 0.319 mmol), N-benzylprop-2-yn-1-amine (69 mg, 0.475 mmol), and zinc(II) bistriflamide (20 mg, 0.0320 mmol). Piperidine **4f** (139 mg, 0.303 mmol, 95%) was obtained as a pale yellow oil:  $R_f$  = 0.43, 20% EtOAc in hexanes;  $^1\text{H-NMR}$  (400 MHz,  $\text{CDCl}_3$ ):  $\delta$  = 7.49-7.46 and 7.38-7.34 (m, AA'BB', 4H), 7.31-7.20 (m, 5H), 5.05 (d,  $J$  = 1.2 Hz, 1H), 4.78 (s, 1H), 3.84 (s, 3H), 3.76 (s, 3H), 3.73 (d,  $J$  = 13.2, 1H), 3.40 (d,  $J$  = 13.2 Hz, 1H), 3.26 (X of ABX system,  $J$  = 12.1, 2.7 Hz, 1H), 2.82 (d,  $J$  = 13.2 Hz, 1H), 2.81 (d,  $J$  = 13.2 Hz, 1H), 2.49 (A of ABX system,  $J$  = 13.6, 2.7 Hz, 1H), 2.35 (B of ABX system,  $J$  = 13.6, 12.1 Hz, 1H);  $^{13}\text{C NMR}$  (100 MHz,  $\text{CDCl}_3$ )  $\delta$  = 170.1, 170.0, 141.9, 140.2, 138.4, 131.9, 129.3, 128.4, 128.3, 127.0, 121.2, 113.6, 64.4, 61.2, 58.9, 57.4, 53.0, 52.7, 41.1; IR (thin film): 3086, 3062, 3028, 3001, 2951, 2795, 1730, 1655, 1590, 1484, 1450, 1434, 1406,



1372, 1322, 1268, 1242, 1212, 1180, 1136, 1115, 1063, 1009, 981, 912, 830, 782, 733, 698; HRMS calc'd for  $C_{23}H_{24}BrNO_4$  = 457.0889, found = 457.0895.

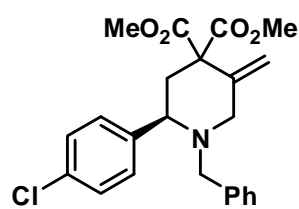

**Piperidine 4g**

Piperidine **4g** was prepared using general experimental procedure A. Reagents employed: (R)-dimethyl 2-(4-chlorophenyl)cyclopropane-1,1-dicarboxylate (133 mg, 0.495 mmol, 98% *ee*), N-benzylprop-2-yn-1-amine (108 mg, 0.744 mmol), and zinc(II) bistriflamide (31 mg, 0.0495 mmol). Piperidine **4g** (194 mg, 0.469 mmol, 95%, 96% *ee*) was obtained as a pale yellow oil:  $R_f$  = 0.43, 20% EtOAc in hexanes;  $^1H$ -NMR (400 MHz,  $CDCl_3$ ):  $\delta$  = 7.44-7.40 (m, 2H), 7.34-7.19 (m, 7H), 5.05 (d,  $J$  = 1.2 Hz, 1H), 4.77 (s, 1H), 3.84 (s, 3H), 3.76 (s, 3H), 3.73 (d, 12.8 Hz, 1H), 3.40 (d,  $J$  = 12.8 Hz, 1H), 3.27 (X of ABX system,  $J$  = 11.6, 2.4, 1H), 2.82 (d,  $J$  = 12.8, 1H), 2.81 (d,  $J$  = 12.8, 1H), 2.49 (A of ABX system,  $J$  = 13.7, 2.4 Hz, 1H) 2.36 (B of ABX system,  $J$  = 13.7, 11.6 Hz, 1H);  $^{13}C$  NMR (100 MHz,  $CDCl_3$ )  $\delta$  = 170.1, 169.9, 141.3, 140.2, 138.3, 133.1, 128.8, 128.4, 128.2, 126.9, 113.6, 64.3, 61.1, 58.8, 57.4, 53.0, 52.7, 41.1 (note: 1  $sp^2$  carbon is missing presumably due to overlap); IR (thin film): 3088, 3064, 3031, 3003, 2954, 2904, 2801, 1735, 1656, 1598, 1494, 1453, 1436, 1410, 1374, 1360, 1321, 1268, 1244, 1213, 1182, 1140, 1117, 1078, 1065, 1015, 983, 914, 834, 801, 784, 736, 703; HRMS calc'd for  $C_{23}H_{24}ClNO_4$  = 413.1394, found = 413.1390.  $[\alpha]_D$  = -42.8 ( $c$  = 0.594,  $CH_2Cl_2$ ).

The enantiomeric excess was determined to be 96% by chiral HPLC, Chiralcel OD-H, 250 x 4.6 mm<sup>2</sup>, Diacel Chemical Industries; 98:2 Hexanes / *i*PrOH at 1.5 mL/min; 220 nm; The retention time for the enantiomers were  $r_t$  (+) = 4.46 min,  $r_t$  (-) = 5.36 min.

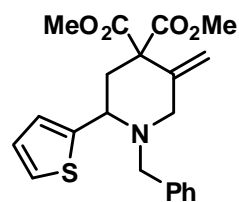

**Piperidine 4h**

Piperidine **4h** was prepared using general experimental procedure A. Reagents employed: dimethyl 2-(thiophen-2-yl)cyclopropane-1,1- (104 mg, 0.432 mmol), N-benzylprop-2-yn-1-amine (94 mg, 0.647 mmol), and zinc(II) bistriflamide (26 mg, 0.0416 mmol). Piperidine **4h** (153 mg, 0.397 mmol, 92%) was obtained as yellow sticky solid:  $R_f$  = 0.42, 20% EtOAc in hexanes;  $^1H$ -NMR (400 MHz,  $CDCl_3$ ):  $\delta$  = 7.32-7.20 (m, 6H), 7.03 (dd,  $J$  = 3.6, 0.6 Hz, 1H), 6.94 (dd,  $J$  = 5.2, 3.6 Hz, 1H), 5.04 (d,  $J$  = 1.2 Hz, 1H), 4.81 (s, 1H), 3.87, (dd,  $J$  = 13.2 Hz, 1H), 3.84 (s, 3H), 3.78 (s, 3H), 3.76 (X of ABX system, 11.8, 3.0 Hz, 1H), 3.38 (d,  $J$  = 13.2 Hz, 1H), 2.95 (d,  $J$  = 13.2 Hz, 2H), 2.67 (A of ABX system,  $J$  = 13.8, 3.0 Hz, 1H), 2.56 (B of ABX system,  $J$  = 13.8, 11.8 Hz, 1H);  $^{13}C$  NMR (100 MHz,  $CDCl_3$ )  $\delta$  = 170.1, 169.9, 146.7, 139.7, 138.6, 128.6, 128.2, 126.9, 126.2, 125.0, 113.9, 61.2, 59.7, 57.6, 57.0, 53.0, 52.7, 40.6 (note: 1  $sp^2$  carbon is missing presumably due to overlap); IR (thin film): 3087, 3065, 3029, 3004, 2953, 2841, 2796, 1735, 1654, 1605, 1495, 1453, 1436, 1373, 1321, 1265, 1245, 1181, 1114, 1077, 1064, 1030, 1017, 980, 915, 860, 834, 788, 739, 700; HRMS calc'd for  $C_{21}H_{23}NO_4S$  = 385.1348, found = 385.1342.

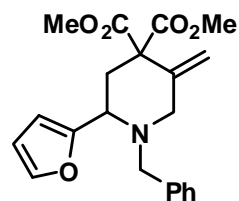

**Piperidine 4i**

Piperidine **4i** was prepared using general experimental procedure A. Reagents employed: dimethyl 2-(furan-2-yl)cyclopropane-1,1-dicarboxylate (100 mg, 0.446 mmol), N-benzylprop-2-yn-1-amine (194 mg, 1.336 mmol),

and zinc(II) bistriflamide (56 mg, 0.0894 mmol). Piperidine **4i** (139 mg, 0.376 mmol, 84%) was obtained as a pale yellow sticky solid:  $R_f$  = 0.36, 20% EtOAc in hexanes;  $^1\text{H-NMR}$  (400 MHz,  $\text{CDCl}_3$ ):  $\delta$  = 7.39 (dd,  $J$  = 2.0, 0.8 Hz, 1H), 7.30-7.19 (m, 5H), 6.35-6.31 (m, 2H), 5.04 (d,  $J$  = 0.8 Hz, 1H), 4.82 (s, 1H), 3.81 (s, 3H), 3.78 (s, 3H), 3.66 (d,  $J$  = 13.6 Hz, 1H), 3.65 (X of ABX system,  $J$  = 11.9, 3.3 Hz, 1H), 3.36 (d,  $J$  = 13.6 Hz, 1H), 3.08 (d,  $J$  = 13.2 Hz, 1H), 3.01 (d,  $J$  = 13.2 Hz, 1H), 2.68 (A of ABX system,  $J$  = 13.8, 11.9 Hz, 1H), 2.60 (B of ABX system,  $J$  = 13.8, 3.3 Hz, 1H);  $^{13}\text{C NMR}$  (100 MHz,  $\text{CDCl}_3$ )  $\delta$  = 170.1, 169.9, 154.3, 141.8, 139.6, 138.3, 128.8, 128.1, 126.9, 113.8, 110.1, 107.6, 60.9, 57.0, 56.2, 52.9, 52.7, 36.0 (note: 1  $sp^3$  carbon is missing presumably due to overlap); IR (thin film): 3288, 3147, 3116, 3087, 3063, 3029, 3004, 2953, 2844, 2817, 1734, 1603, 1586, 1496, 1453, 1436, 1349, 1311, 1270, 1206, 1150, 1119, 1074, 1028, 1012, 970, 941, 916, 885, 865, 814, 739, 700, 599; HRMS calc'd for  $\text{C}_{21}\text{H}_{23}\text{NO}_5$  = 369.1576, found = 369.1567.

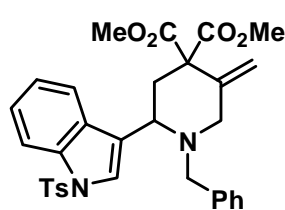

**Piperidine 4j**

Piperidine **4j** was prepared using general experimental procedure A. Reagents employed: dimethyl 2-(1-tosyl-1H-indol-3-yl)cyclopropane-1,1-dicarboxylate (150 mg, 0.351 mmol), N-benzylprop-2-yn-1-amine (76 mg, 0.523 mmol), and zinc(II) bistriflamide (22 mg, 0.0352 mmol). Piperidine **4j** (199 mg, 0.347 mmol, 99%) was obtained as a pale yellow solid:  $R_f$  = 0.22, 20% EtOAc in hexanes;  $^1\text{H-NMR}$  (400 MHz,  $\text{CDCl}_3$ ):  $\delta$  = 7.97 (d,  $J$  = 8.4 Hz, 1H), 7.92 (d,  $J$  = 8.0 Hz, 1H), 7.72-7.68 (m, 2H), 7.58 (s, 1H), 7.40-6.98 (m, 9H), 5.05 (s, 1H), 4.82 (s, 1H), 3.85 (s, 3H), 3.75 (s, 3H), 3.67 (d,  $J$  = 13.4 Hz, 1H), 3.66 (X of ABX system,  $J$  = 12.1, 2.7 Hz, 1H), 3.39 (d,  $J$  = 13.4, 1H), 2.89 (d,  $J$  = 12.0 Hz, 1H), 2.86 (d,  $J$  = 12.0 Hz, 1H), 2.69 (A of ABX system,  $J$  = 13.8, 12.1 Hz, 1H), 2.55 (B of ABX system,  $J$  = 13.8, 2.7 Hz, 1H), 2.25 (s, 3H);  $^{13}\text{C NMR}$  (100 MHz,  $\text{CDCl}_3$ )  $\delta$  = 170.3, 170.0, 144.9, 139.9, 138.5, 135.7, 135.0, 129.8, 129.3, 128.6, 128.2, 126.9, 126.7, 125.0, 124.0, 123.8, 123.2, 121.1, 114.0, 113.8, 61.3, 57.6, 57.3, 57.0, 53.1, 52.7, 38.2, 21.5; IR (thin film): 3107, 3086, 3064, 3030, 3004, 2955, 2846, 2797, 1735, 1654, 1598, 1495, 1447, 1372, 1269, 1243, 1213, 1189, 1175, 1132, 1119, 1100, 1076, 1019, 986, 915, 813, 748, 705, 664; HRMS calc'd for  $\text{C}_{32}\text{H}_{32}\text{N}_2\text{O}_6\text{S}$  = 572.1981, found = 572.1993.

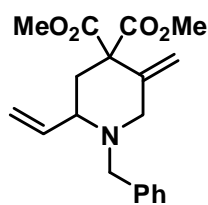

**Piperidine 4k**

Piperidine **4k** was prepared using general experimental procedure A. Reagents employed: dimethyl 2-vinylcyclopropane-1,1-dicarboxylate (117 mg, 0.635 mmol), N-benzylprop-2-yn-1-amine (138 mg, 0.950 mmol), and zinc(II) bistriflamide (40 mg, 0.0639 mmol). Piperidine **4k** (175 mg, 0.531 mmol, 84%) was obtained as a pale yellow oil:  $R_f$  = 0.29, 20% EtOAc in hexanes;  $^1\text{H-NMR}$  (400 MHz,  $\text{CDCl}_3$ ):  $\delta$  = 7.33-7.21 (m, 5H), 5.83 (ddd,  $J$  = 17.2, 10.0, 8.0 Hz, 1H), 5.28 (d,  $J$  = 17.2 Hz, 1H), 5.19 (dd, 10.0, 0.8 Hz, 1H), 4.98 (s, 1H), 4.73 (s, 1H), 4.05 (d,  $J$  = 13.6 Hz, 1H), 3.80 (s, 3H), 3.77 (s, 3H), 3.28 (d,  $J$  = 12.8 Hz, 1H), 3.03 (d,  $J$  = 13.6 Hz, 1H), 2.85 (ddd, X of ABX system,  $J$  = 11.3, 8.0, 2.7 Hz, 1H), 2.79 (d,  $J$  = 12.8 Hz, 1H), 2.42 (A of ABX system,  $J$  = 13.8, 2.7 Hz, 1H), 2.28 (B of ABX system,  $J$  = 13.8, 11.3 Hz, 1H);  $^{13}\text{C NMR}$  (100 MHz,  $\text{CDCl}_3$ )  $\delta$  = 170.25, 170.16, 140.3, 140.0, 138.5, 128.8, 128.2, 126.9, 117.5, 113.4, 62.7, 60.7, 58.3, 56.5, 52.9, 52.6, 38.1; IR (thin film): 3086, 3064, 3029, 3001, 2978, 2953, 2910, 2841, 2794, 1736, 1654, 1495, 1453, 1437, 1373, 1359, 1323,

1262, 1242, 1204, 1162, 1129, 1069, 1029, 1022, 995, 918, 822, 784, 742, 700; HRMS calc'd for  $C_{19}H_{23}NO_4$  = 329.1627, found = 329.1638.

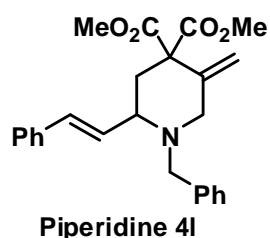

Piperidine **4l** was prepared using general experimental procedure A. Reagents employed: (E)-dimethyl 2-styrylcyclopropane-1,1-dicarboxylate (120 mg, 0.461 mmol), N-benzylprop-2-yn-1-amine (100 mg, 0.689 mmol), and zinc(II) bistriflamide (29 mg, 0.0463 mmol). Piperidine **4l** (174 mg, 0.429 mmol, 93%) was obtained as a yellow gummy solid:  $R_f$  = 0.29, 20% EtOAc in hexanes;  $^1H$ -NMR (400 MHz,  $CDCl_3$ ):  $\delta$  = 7.39-7.36 (m, 2H), 7.34-7.22 (m, 8H), 6.63 (d,  $J$  = 16.0 Hz, 1H), 6.21 (dd,  $J$  = 16.0, 8.0 Hz, 1H), 5.04 (s, 1H), 4.78 (m, 1H), 4.11 (d,  $J$  = 13.2 Hz, 1H), 3.84 (s, 3H), 3.78 (s, 3H), 3.35 (d,  $J$  = 13.2 Hz, 1H), 3.10 (d,  $J$  = 13.2 Hz, 1H), 3.03 (ddd, X of ABX system,  $J$  = 11.1, 8.0, 2.9 Hz, 1H), 2.84 (d,  $J$  = 13.2 Hz, 1H), 2.52 (A of ABX system,  $J$  = 13.5, 2.9 Hz, 1H), 2.39 (B of ABX system,  $J$  = 13.5, 11.1 Hz, 1H);  $^{13}C$  NMR (100 MHz,  $CDCl_3$ )  $\delta$  = 170.3, 170.2, 140.0, 138.6, 136.6, 132.3, 131.4, 128.8, 128.5, 128.2, 127.6, 126.9, 126.3, 113.4, 62.2, 60.7, 58.8, 56.8, 52.9, 52.7, 38.4; IR (thin film): 3085, 3062, 3028, 3003, 2953, 2840, 2795, 1735, 1654, 1600, 1495, 1450, 1436, 1361, 1321, 1264, 1243, 1200, 1178, 1155, 1110, 1068, 1029, 1016, 971, 914, 784, 749, 697; HRMS calc'd for  $C_{25}H_{27}NO_4$  = 405.1940, found = 405.1937.

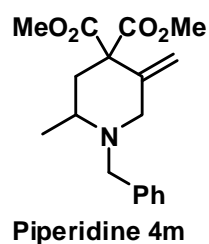

Piperidine **4m** was prepared using general experimental procedure A with modifications to the equivalency of reagents. Reagents employed: dimethyl 2-methylcyclopropane-1,1-dicarboxylate (106 mg, 0.616 mmol), N-benzylprop-2-yn-1-amine (268 mg, 1.846 mmol), and zinc(II) bistriflamide (77 mg, 0.123 mmol). Piperidine **4m** (115 mg, 0.362 mmol, 59%) was obtained as a yellow oil:  $R_f$  = 0.23, 20% EtOAc in hexanes;  $^1H$ -NMR (400 MHz,  $CDCl_3$ ):  $\delta$  = 7.32-7.22 (m, 5H), 4.96 (s, 1H), 4.74 (s, 1H), 3.94 (d,  $J$  = 13.4 Hz, 1H), 3.78 (s, 6H), 3.23 (d,  $J$  = 7.8 Hz, 1H), 3.20 (d,  $J$  = 7.8 Hz, 1H), 2.88 (d,  $J$  = 13.4 Hz, 1H), 2.53 (ddq, X of ABX system,  $J$  = 11.3, 6.4, 2.7 Hz, 1H), 2.37 (A of ABX system,  $J$  = 13.6, 2.7 Hz, 1H), 2.18 (B of ABX system,  $J$  = 13.6, 11.3 Hz, 1H), 1.23 (d,  $J$  = 6.4 Hz, 3H);  $^{13}C$  NMR (100 MHz,  $CDCl_3$ )  $\delta$  = 170.5, 170.4, 140.5, 138.8, 128.9, 128.2, 126.8, 113.2, 61.1, 56.7, 55.8, 53.4, 52.8, 52.6, 39.1, 19.8; IR (thin film): 3086, 3063, 3028, 2953, 2841, 2794, 1737, 1653, 1495, 1453, 1436, 1375, 1360, 1330, 1245, 1213, 1158, 1143, 1119, 1088, 1073, 1028, 963, 911, 783, 741, 668; HRMS calc'd for  $C_{18}H_{23}NO_4$  = 317.1627, found = 317.1624.

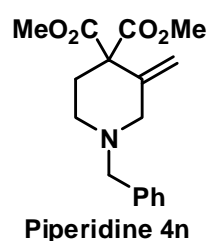

Piperidine **4n** was prepared using general experimental procedure A with modifications to the equivalency of reagents. Toluene was also used in replace of benzene. Reagents employed: dimethyl cyclopropane-1,1-dicarboxylate (108 mg, 0.683 mmol), N-benzylprop-2-yn-1-amine (149 mg, 1.026 mmol), and zinc(II) bistriflamide (64 mg, 0.102 mmol). Piperidine **4n** (151 mg, 0.498 mmol, 73%) was obtained as a yellow oil:  $R_f$  = 0.20, 20% EtOAc in hexanes;  $^1H$ -NMR (400 MHz,  $CDCl_3$ ):  $\delta$  = 7.32-7.23 (m, 5H), 5.10 (s, 1H), 4.76 (s, 1H), 3.78 (s, 6H), 3.50 (s, 2H), 3.09 (s, 2H), 2.50-2.44 (m, 2H), 2.37-2.34 (m, 2H);  $^{13}C$  NMR (100 MHz,  $CDCl_3$ )  $\delta$  = 170.4, 140.8, 137.8, 129.0, 128.2, 127.1, 113.5, 62.2, 60.9, 58.9, 52.7, 49.8,

31.9 ; IR (thin film): 3088, 3064, 3029, 3000, 2953, 2909, 2840, 2801, 2757, 2718, 1735, 1653, 1496, 1455, 1437, 1364, 1340, 1286, 1259, 1213, 1194, 1179, 1137, 1105, 1076, 1059, 1029, 1015, 957, 918, 818, 780, 742, 700; HRMS calc'd for  $C_{17}H_{21}NO_4$  = 303.1471, found = 303.1479.

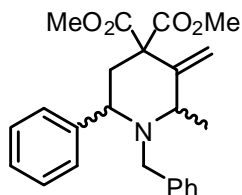

**Piperidine 7**  
(equimolar mix of 4 isomers)

Piperidine **7**(equimolar mix of 4 isomers) was prepared using general experimental procedure A with modifications to the equivalency of reagents. Reagents employed: dimethyl 2-phenylcyclopropane-1,1-dicarboxylate (100 mg, 0.427 mmol), N-benzylbut-3-yn-2-amine (204 mg, 1.281 mmol), and zinc(II) bistriflamide (27 mg, 0.0432 mmol). Piperidine **7**(equimolar mix of 4 isomers) (165 mg, 0.419 mmol, 98%) was obtained as a pale yellow oil:  $R_f$  = 0.40, 20% EtOAc in hexanes;  $^1H$ -NMR (400 MHz,  $CDCl_3$ ): Spectral data is consistent with a 1:1 mixture of **7**(2*S*,6*R*) and **7**(2*S*,6*S*) (*vide infra*).

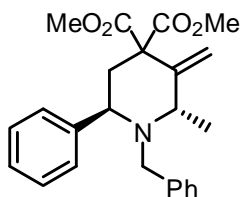

**Piperidine 7(2*S*,6*R*)**

Piperidine **7**(2*S*,6*R*) was prepared using general experimental procedure A with modifications to the equivalency of reagents. Reagents employed: (*S*)-dimethyl 2-phenylcyclopropane-1,1-dicarboxylate (48 mg, 0.205 mmol, 95% *ee*), (*S*)-N-benzylbut-3-yn-2-amine (66 mg, 0.414 mmol), and zinc(II) bistriflamide (17 mg, 0.0272 mmol). Piperidine **7**(2*S*,6*R*) (78 mg, 0.198 mmol, 96%, diastereomeric purity >97%) was obtained as a very pale yellow oil:  $R_f$  = 0.41, 20% EtOAc in hexanes;  $^1H$ -NMR (400 MHz,  $CDCl_3$ ):  $\delta$  = 7.52-7.48 (m, 2H), 7.36-7.18 (m, 8H), 5.12 (s, 1H), 4.97 (s, 1H), 4.21 (X of ABX system,  $J$  = 10.7, 3.7 Hz, 1H), 3.81 (s, 3H), 3.74 (s, 3H), 3.63 (q,  $J$  = 7.2 Hz, 1H), 3.55 (d,  $J$  = 14.0 Hz, 1H), 3.34 (d,  $J$  = 14.0 Hz, 1H), 2.76 (A of ABX system,  $J$  = 13.5, 3.7 Hz, 1H), 2.57 (B of ABX system,  $J$  = 13.5, 10.7 Hz, 1H), 1.21 (d,  $J$  = 7.2 Hz, 3H);  $^{13}C$  NMR (100 MHz,  $CDCl_3$ )  $\delta$  = 171.1, 171.0, 143.2, 142.3, 139.6, 128.4, 128.2, 128.1, 127.7, 127.1, 126.6, 114.7, 60.0, 56.8, 55.2, 52.7, 51.3, 35.4, 15.8 (note: 1  $sp^3$  carbon is missing presumably due to overlap); IR (thin film): 3086, 3062, 3029, 2979, 2951, 2841, 1731, 1645, 1603, 1494, 1451, 1434, 1376, 1267, 1243, 1211, 1148, 1121, 1088, 1076, 1062, 1029, 1009, 969, 912, 862, 818, 736, 699; HRMS calc'd for  $C_{24}H_{27}NO_4$  = 393.1940, found = 393.1923.  $[\alpha]_D^{25}$  = +33.9 ( $c$  = 0.327,  $CH_2Cl_2$ ).

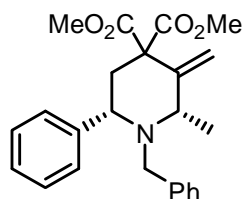

**Piperidine 7(2*S*,6*S*)**

Piperidine **7**(2*S*,6*S*) was prepared using general experimental procedure A. Reagents employed: (*R*)-dimethyl 2-phenylcyclopropane-1,1-dicarboxylate (60 mg, 0.256 mmol), (*S*)-N-benzylbut-3-yn-2-amine (61 mg, 0.383 mmol, 98% *ee*), and zinc(II) bistriflamide (16 mg, 0.0256 mmol). Piperidine **7**(2*S*,6*S*) (96 mg, 0.244 mmol, 95%, diastereomeric purity >97%) was obtained as a very pale yellow oil:  $R_f$  = 0.39, 20% EtOAc in hexanes;  $^1H$ -NMR (400 MHz,  $CDCl_3$ ):  $\delta$  = 7.53-7.49 (m, 2H), 7.34-7.29 (m, 2H), 7.26-7.19 (m, 5H), 7.17-7.12 (m, 1H), 5.23 (s, 1H), 5.05 (s, 1H), 3.85-3.77 (m obscured by s at 3.83 and 3.79 ppm, 1 H), 3.83 (s, 3H), 3.79 (s, 3H), 3.66 (d,  $J$  = 15.6 Hz, 1H), 3.50 (q,  $J$  = 6.8 Hz, 1H), 3.38 (d,  $J$  = 15.6 Hz, 1H), 2.60 (A of ABX system,  $J$  = 14.0, 12.9 Hz, 1H), 2.53 (B of ABX

system,  $J = 14.0, 2.3$  Hz, 1H), 1.13 (d,  $J = 6.8$  Hz, 3H);  $^{13}\text{C}$  NMR (100 MHz,  $\text{CDCl}_3$ )  $\delta = 171.0, 170.7, 143.4, 143.3, 141.4, 128.3, 127.8, 127.7, 127.2, 126.2, 113.9, 109.7, 63.5, 61.0, 60.0, 54.8, 52.9, 52.8, 37.8, 21.3$ ; IR (thin film): 3087, 3062, 3028, 2981, 2952, 2881, 2844, 2808, 1735, 1644, 1603, 1495, 1454, 1435, 1370, 1314, 1244, 1208, 1151, 1124, 1094, 1066, 1029, 971, 915, 765, 733, 700; HRMS calc'd for  $\text{C}_{24}\text{H}_{27}\text{NO}_4 = 393.1940$ , found = 393.1927.  $[\alpha]_{\text{D}} = -14.2$  ( $c = 0.562$ ,  $\text{CH}_2\text{Cl}_2$ ).

---

(R)-4-(trimethylsilyl)but-3-yn-2-yl methanesulfonate was prepared according to the procedure of Marshall and Chobanian.<sup>1</sup>

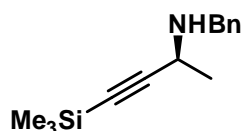

(R)-4-(trimethylsilyl)but-3-yn-2-yl methanesulfonate (463 mg, 2.101 mmol) was dissolved in benzyl amine (1.30 ml, 11.913 mmol) and the reaction stirred until TLC showed complete consumption of the starting material.

The reaction was poured into an aqueous  $\text{NaHCO}_3$  solution and extracted 4 times with ethyl acetate. The combined organics were washed with water then brine, and dried with  $\text{MgSO}_4$ . The solvent was removed under reduced pressure to produce a crude oil that was purified by column chromatography on silica gel (ethyl acetate / hexanes as eluent) to yield (S)-N-benzyl-4-(trimethylsilyl)but-3-yn-2-amine (0.446 g, 1.927 mmol, 92%) as a colorless oil:  $R_f = 0.47$ , 20% EtOAc in hexanes;  $^1\text{H}$ -NMR (400 MHz,  $\text{CDCl}_3$ ):  $\delta = 7.37\text{--}7.30$  (m, 4H), 7.28-7.23 (m, 1H), 4.00 (d,  $J = 12.8$  Hz, 1H), 3.80 (d,  $J = 12.8$  Hz, 1H), 3.49 (q,  $J = 6.8$  Hz, 1H), 1.37-1.34 (br.s obscured by d at 1.35 ppm, 1H) 1.35 (d,  $J = 6.8$  Hz, 3H), 0.19 (s, 9H);  $^{13}\text{C}$  NMR (100 MHz,  $\text{CDCl}_3$ )  $\delta = 140.0, 128.40, 128.39, 127.0, 108.6, 87.1, 51.4, 45.1, 22.2, 0.14$ ; IR (thin film): 3086, 3065, 3028, 2959, 2933, 2897, 2158, 1496, 1454, 1370, 1303, 1250, 1137, 1113, 1070, 884, 841, 760, 733, 698; HRMS calc'd for  $\text{C}_{14}\text{H}_{21}\text{NSi} = 231.1443$ , found = 231.1438.

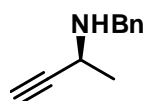

(S)-N-benzyl-4-(trimethylsilyl)but-3-yn-2-amine (230 mg, 0.994 mmol) was dissolved in MeOH (3.0 ml).  $\text{K}_2\text{CO}_3$  (206 mg, 1.490 mmol) was then added and the reaction stirred until TLC showed complete consumption of the starting material.

The reaction was poured into water and extracted 4 times with ethyl acetate. The combined organics were washed with water then brine, and dried with  $\text{MgSO}_4$ . The solvent was removed under reduced pressure to yield (S)-N-benzylbut-3-yn-2-amine (144 mg, 0.992 mmol, 100%, >99% ee) as a light yellow oil:  $R_f = 0.32$ , 20% EtOAc in hexanes;  $^1\text{H}$ -NMR (400 MHz,  $\text{CDCl}_3$ ):  $\delta = 7.38\text{--}7.30$  (m, 4H), 7.28-7.23 (m, 1H), 4.02 (d,  $J = 12.8$  Hz, 1H), 3.81 (d,  $J = 12.8$  Hz, 1H), 3.50 (dq,  $J = 7.2, 2.0$  Hz, 1H), 2.32 (d,  $J = 2.0$  Hz, 1H), 1.44-1.38 (br.s, 1H), 1.39 (d,  $J = 7.2$  Hz, 3H);  $^{13}\text{C}$  NMR (100 MHz,  $\text{CDCl}_3$ )  $\delta = 139.9, 128.40, 128.37, 127.0, 86.3, 70.7, 51.4, 44.3, 22.3$ ; IR (thin film): 3292, 3087, 3064, 3029, 2974, 2933, 2843, 1496, 1453, 1372, 1308, 1137, 1067, 1028, 980, 909, 838, 734, 698; HRMS calc'd for  $\text{C}_{11}\text{H}_{13}\text{N} = 159.1048$ , found = 159.1053;  $[\alpha]_{\text{D}} = -118.5$  ( $c = 5.462$ ,  $\text{CH}_2\text{Cl}_2$ ).

The enantiomeric excess was determined to be >99% by chiral HPLC, Chiralcel OD-H, 250 x 4.6 mm<sup>2</sup>, Diacel Chemical Industries; 98:2 Hexanes / *i*PrOH at 1.0 mL/min; 220 nm; The retention time for the enantiomers with the nitrogen protected with an acetyl group were  $r_t(+)$  = 16.59 min,  $r_t(-)$  = 17.89 min.

**Zn(NTf<sub>2</sub>)<sub>2</sub>** ZnO (292 mg, 3.589 mmol) and trifluoromethane-sulfonimide (2.020 g, 7.185 mmol) were added to distilled H<sub>2</sub>O (15 ml) and the reaction brought to reflux. After 22 hours the solvent was removed under reduced pressure to yield zinc(II) bistriflamide (2.570 g, presumably as the hydrate) as an off-white crystalline solid: <sup>19</sup>F-NMR (400 MHz, Acetonitrile-d<sub>3</sub>): δ = -79.635

---

**References:**

1 Marshall, J. A.; Chobanian, H. *Organic Syntheses*, **2005**, 82, 43.

ABL-14-15-CARBON  
STANDARD 1H OBSERVE

exp3 s2pul

|             |                |         |          |
|-------------|----------------|---------|----------|
| SAMPLE      |                | SPECIAL |          |
| date        | Jan 13 2009    | temp    | not used |
| solvent     | cdcl3          | gain    | not used |
| file        | /export/home/~ | spin    | not used |
| nmr1        | /valkup/autoc~ | hst     | 0.008    |
| 13          | 01/09/0402     | pw90    | 13.500   |
| ACQUISITION | alfa           | 20.000  |          |
| SW          | 6402.0         | FLAGS   |          |
| at          | 4.000          | il      | n        |
| np          | 51216          | in      | n        |
| fb          | not used       | dp      | y        |
| bs          | 16             | hs      | nn       |
| d1          | 1.000          | fn      | not used |
| nt          | 8              | fn      | not used |
| ct          | 8              | DISPLAY |          |
| TRANSMITTER |                | SP      | -0.6     |
| tn          | H1             | WD      | 3204.3   |
| sfrq        | 400.083        | rf1     | 3702.9   |
| tof         | 424.3          | rfp     | 2904.6   |
| tpwr        | 58             | rp      | -168.5   |
| pw          | 6.750          | lp      | -69.1    |
| DECOUPLER   |                | C13     | WC       |
| dn          | 0              | SC      | 250      |
| dof         | 0              | VS      | 0        |
| dm          | nnn            | VS      | 38       |
| dmm         | C              | TH      | 54       |
| dpwr        | 44             | AI      | cdc      |
| dmf         | 18500          | PH      |          |

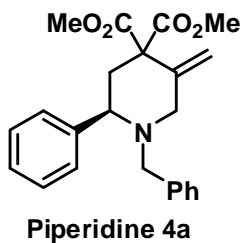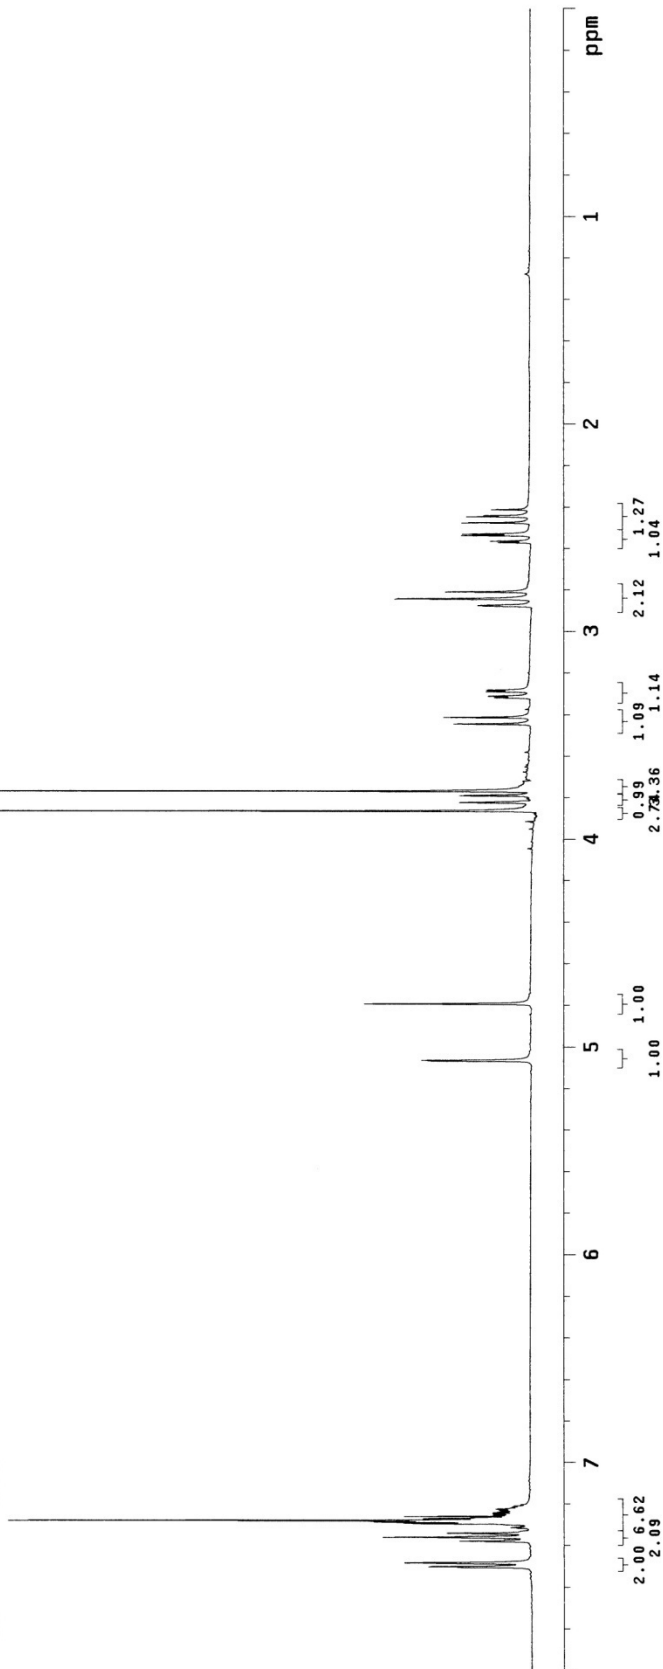

ABL-14-15-CARBON  
STANDARD 1H OBSERVE

```

exp3  szpu1
SAMPLE
date Jan 13 2009 temp not used
solvent cdc13 gain not used
file /export/home/~ spin not used
vnmr1/walkup/autoc~ hst 0.008
13.01.09/0403 pw90 11.100
ACQUISITION alfa 20.000
sw 25125.6
at 1.199 fl n
np 60270 tn n
fb 13800 dp y
bs 64 hs mn
dl 1.000 lb 1.00
nt 256 fn not used
ct TRANSMITTER C13 DISPLAY -4.3
tn C13 sp 18121.8
sfrq 100.611 wpr 19271.8
tot 1552.6 rfl 7146.2
tpwr 5.59 rfp 124.5
pw DECOUPLER 1p -361.4
dn H1 PLOT
dof 0 wc 250
dm yyv sc 0
dnn w vs 61
dpwr 40 th 7
dmf 8900 al no ph

```

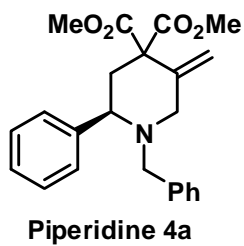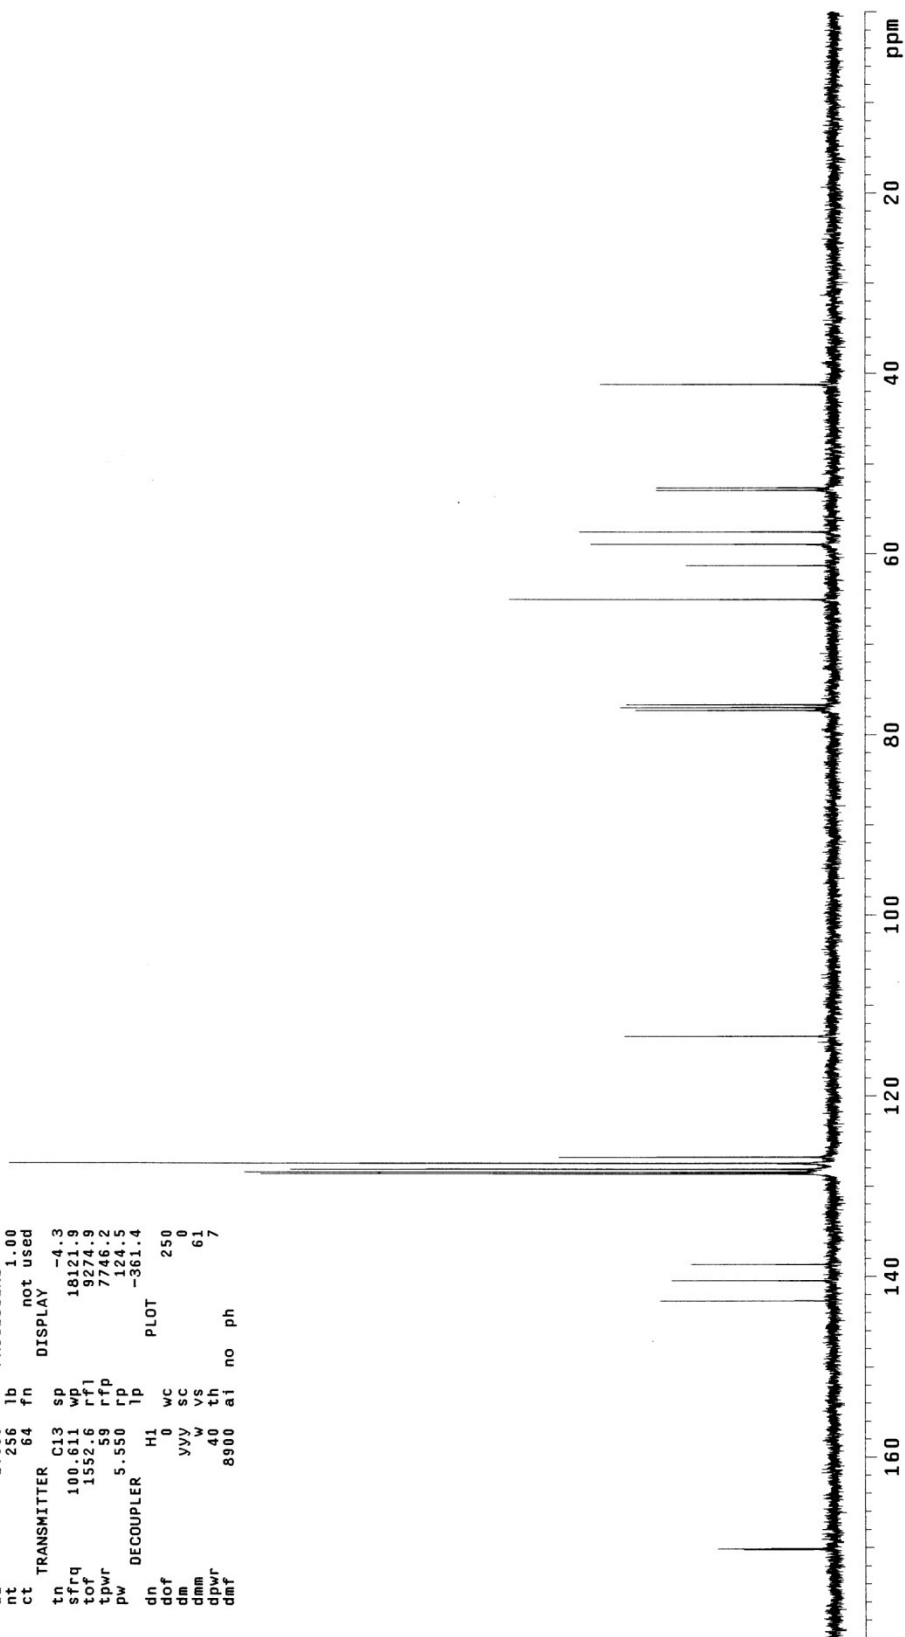



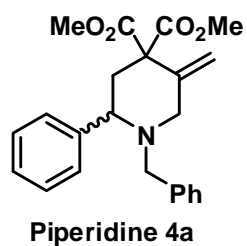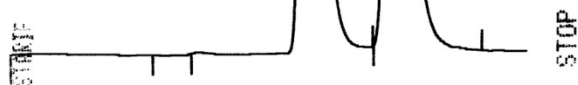

| AREA% | RT   | AREA   | TYPE | AR/NT | AREA%  |
|-------|------|--------|------|-------|--------|
| 3.89  | 3.89 | 136730 | PB   | 0.315 | 49.182 |
| 5.03  | 5.03 | 141280 | PB   | 0.376 | 50.818 |

RUN # 8  
 TOTAL AREA= 278010  
 MUL FACTOR= 1.0000E+00

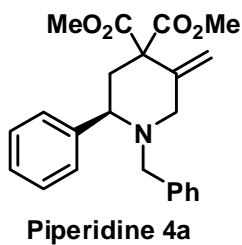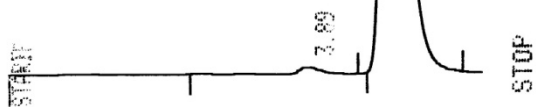

| AREA% | RT   | AREA   | TYPE | AR/NT | AREA%  |
|-------|------|--------|------|-------|--------|
| 3.89  | 3.89 | 5450   | BB   | 0.417 | 1.994  |
| 5.02  | 5.02 | 267940 | BB   | 0.377 | 98.007 |

RUN # 7  
 TOTAL AREA= 273390  
 MUL FACTOR= 1.0000E+00

ABL-13.205D dilute piperonal adduct  
STANDARD 1H OBSERVE

exp5 s2pul

| SAMPLE                   |                     | SPECIAL |          |
|--------------------------|---------------------|---------|----------|
| date                     | Jan 9 2009          | temp    | not used |
| solvent                  | cdcl3               | gain    | not used |
| file                     | /export/home/~ spin | spin    | 20       |
| nmr1/vnmrsv/data/~ hst   |                     | hst     | 0.008    |
| /Kerr/ABL-13.205D/~ pw90 |                     | pw90    | 13.500   |
| PROTON.fid               |                     | alpha   | 20.000   |
| ACQUISITION              |                     |         |          |
| sw                       | 6402.0              | l1      | n        |
| at                       | 4.000               | in      | n        |
| np                       | 51216               | dp      | y        |
| fb                       | not used            | hs      | nn       |
| bs                       | 16                  |         |          |
| di                       | 1.000               | fn      | not used |
| nt                       | 8                   |         |          |
| ct                       | 8                   | sp      | -1.3     |
| TRANSMITTER              |                     |         |          |
| tn                       | H1                  | wp      | 3205.1   |
| sfrq                     | 400.083             | rfl     | 800.5    |
| tof                      | 424.3               | rpf     | 0        |
| tpwr                     | 58                  | lp      | -147.7   |
| pw                       | 6.750               |         | -106.6   |
| DECOUPLER                |                     |         |          |
| dn                       | C13                 | sc      | 250      |
| dof                      | 0                   | vs      | 0        |
| dm                       | nnn                 | th      | 80       |
| dmm                      | c                   | al      | 54       |
| dpwr                     | 44                  |         |          |
| daf                      | 18500               |         |          |

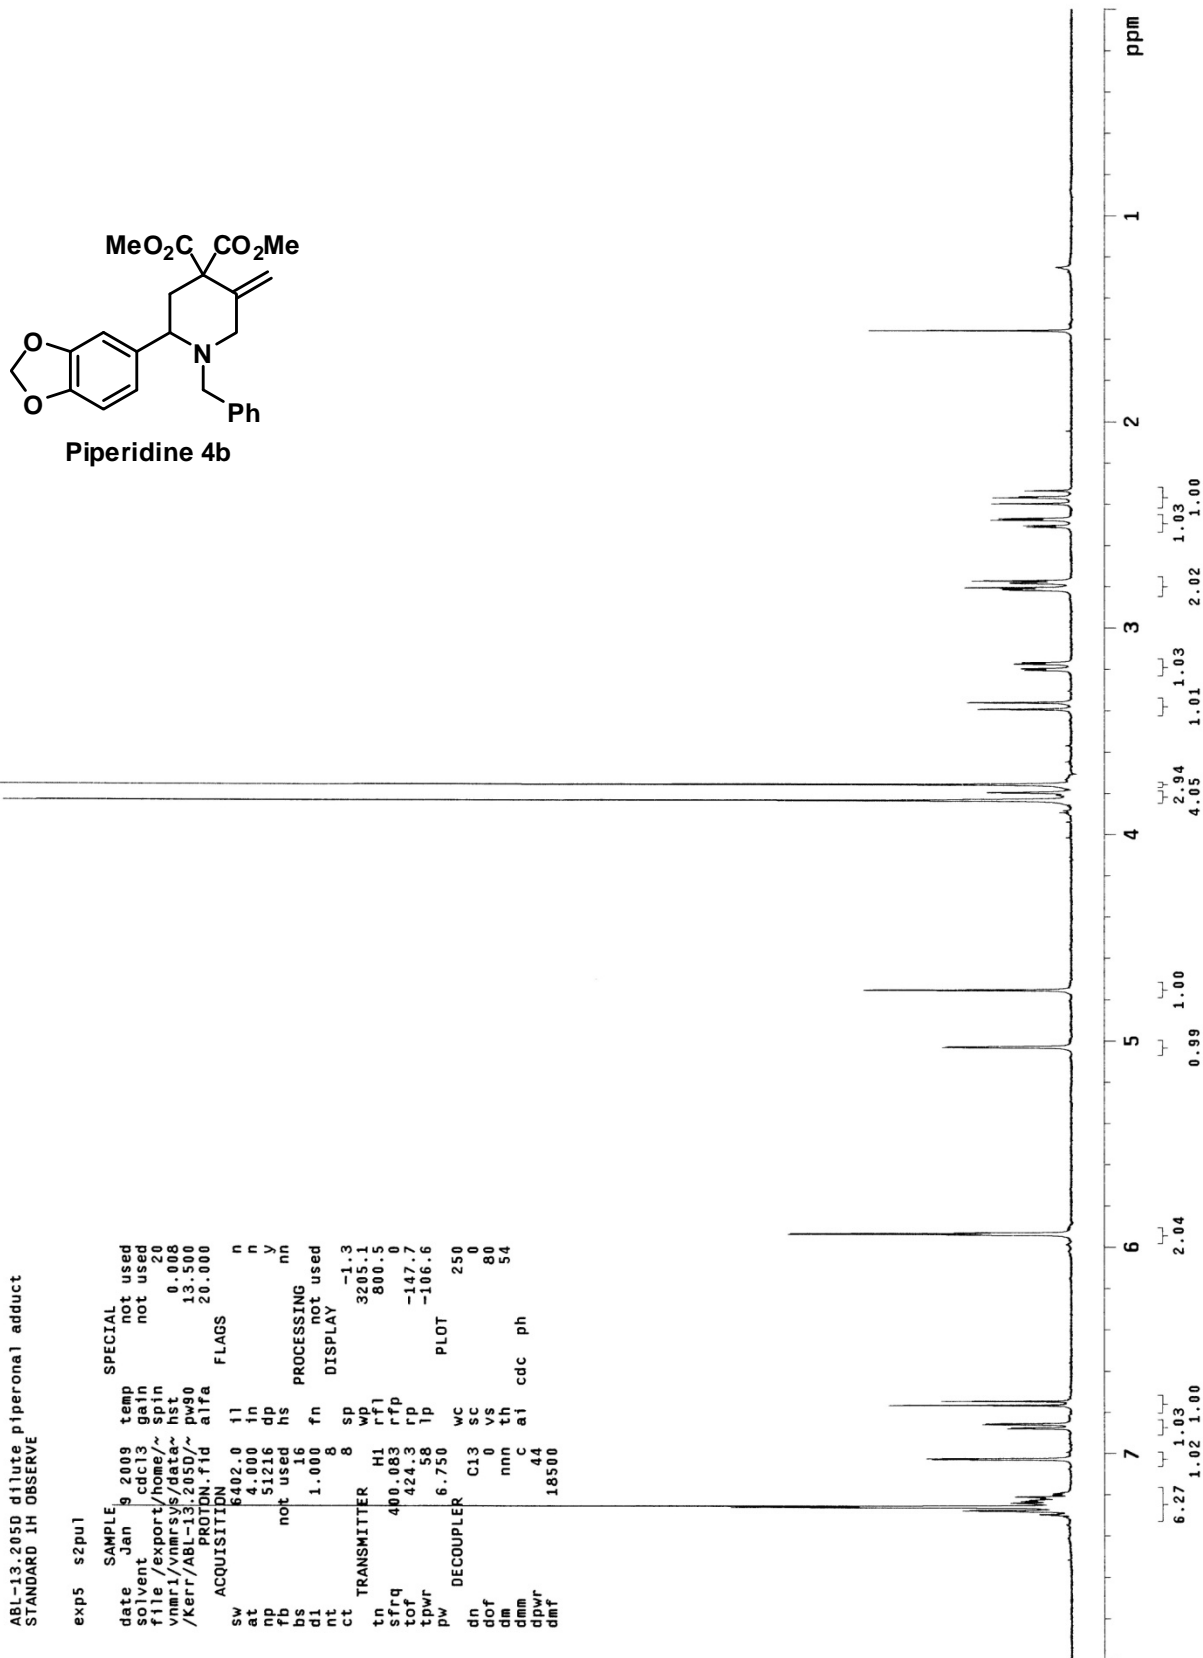

ABU-13.205C Carbon of piperonal cyclo  
STANDARD 1H OBSERVE

```

exp1 s2pul
date Jan 8 2009 temp not used
solvent cdc13 gain not used
file /export/home/~ spin not used
vnmr1/walkup/autoc~ hst 0.008
08.01.09/0206 pw90 11.100
ACQUISITION alfa 20.000
sw 25125.6
at 1.199 11 n
np 60270 1n n
fb 13800 dp y
bs 64 hs PROCESSING
d1 1.000 1b 1.00
nt 256 1b not used
ct 256 1n DISPLAY 7.2
tn TRANSMITTER C13 sp 7.2
sfrq 100.611 wp1 18094.3
tor 1552.6 rfp 19284.0
tpwr 7748.2 rfp 7748.2
pw 5.550 1p -271.4
DECOUPLER H1 PLOT
dn 0 wc 250
dof 0 yyv sc 0
dm 40 vs 280
dpm 40 th 12
dmf 8900 at no ph

```

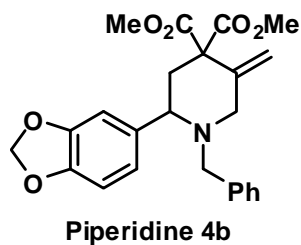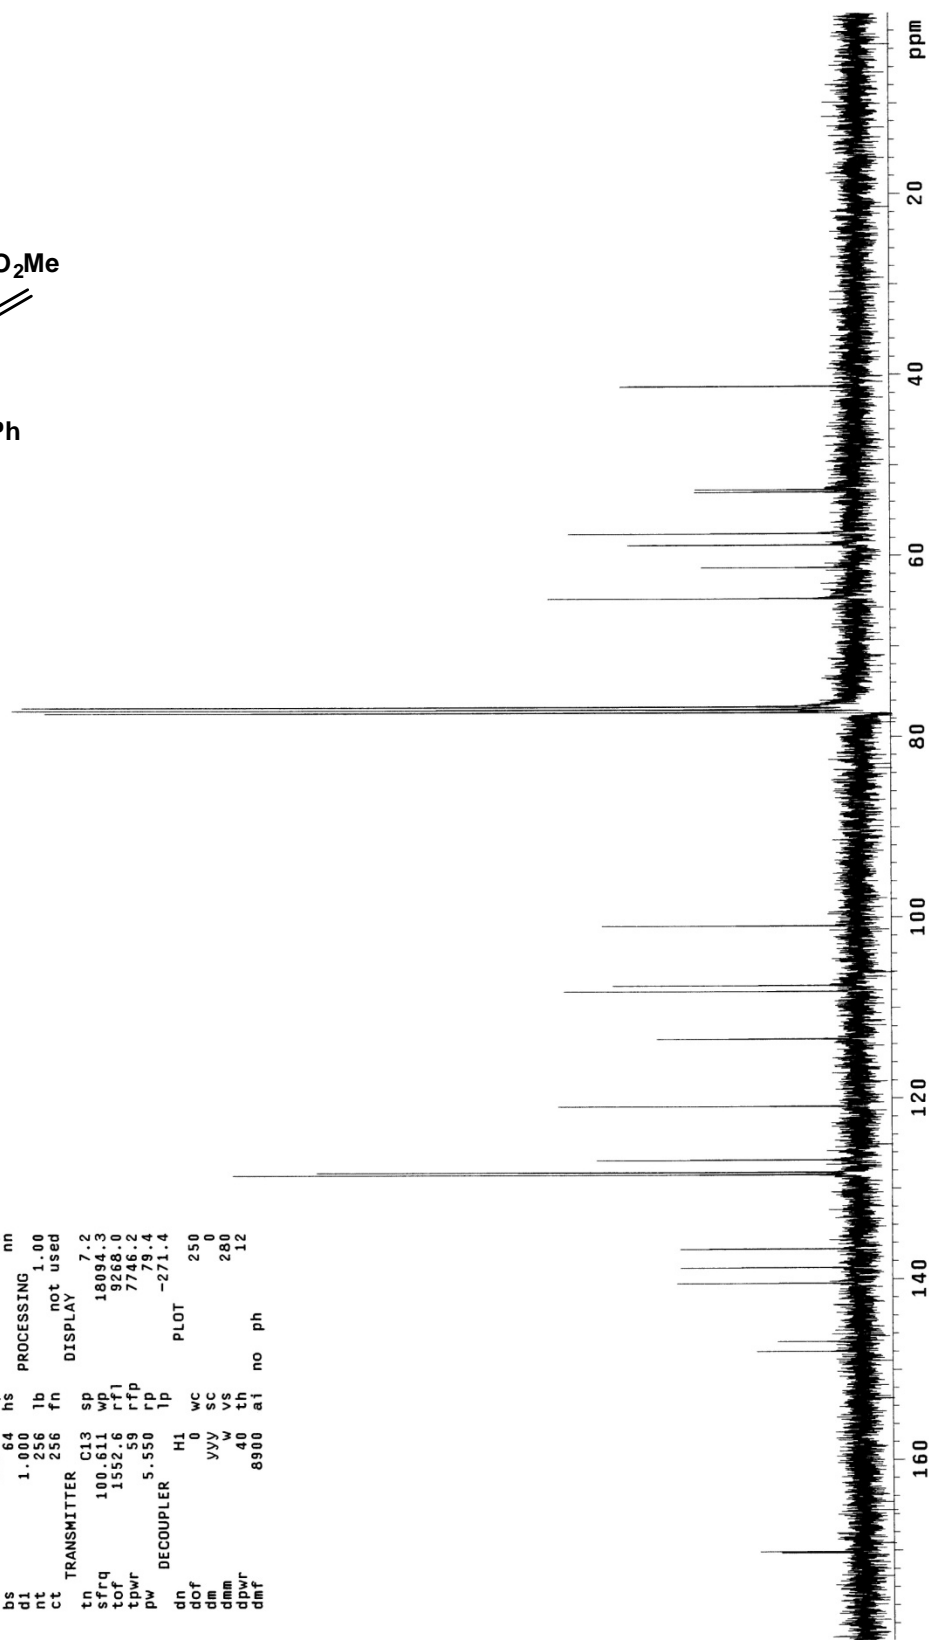

TPL-P-163-a0  
STANDARD 1H OBSERVE

```

exp1 s2pu1
SAMPLE
date Jan 9 2009 temp not used
solvent cdcl3 gain not used
file /export/home/~ spin 20
vnmr1/wakup/auto/~ hst 0.008
09-01-09/0215 pw90 13.500
ACQUISITION alfa 26.000
SW 6402.0
at 4.000 il n
np 51216 in n
fb not used dp y
bs 16 hs
d1 1.000
nt 8 fn not used
ct 8 DISPLAY
TRANSMITTER H1 sp 1.7
tn H1 wp 3200.8
sfrq 400.083 rf1 800.5
tof 424.3 rfp 0
tpwr 58 rp -152.2
pw 6.750 lp -96.1
DECOUPLER C13 wc 250
dn 0 sc 0
dof 0 sc 0
dm nnn vs 55
dmm c th 54
dpwr 44 ai cdc ph
dmf 18500

```

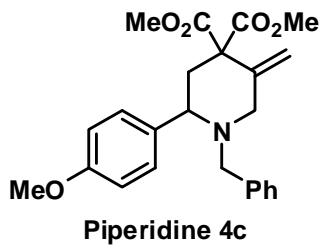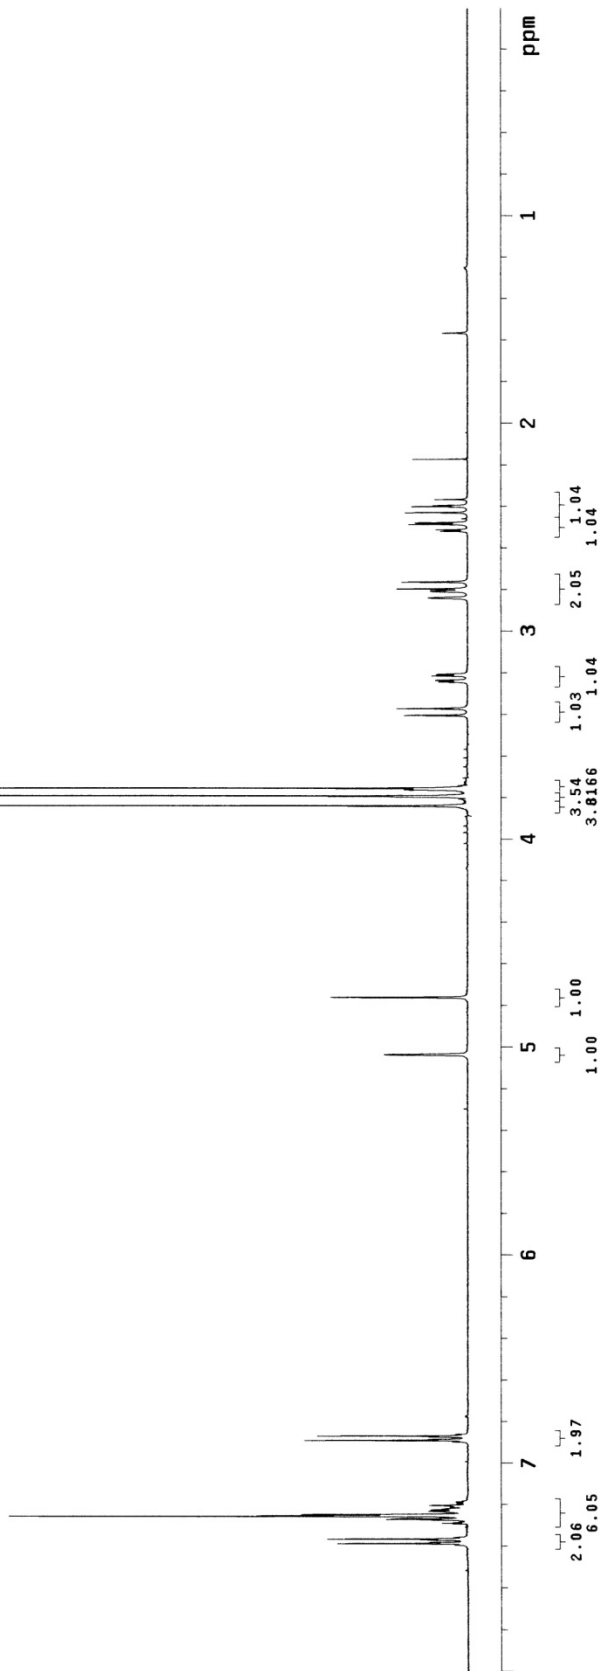

TPL-P-163-carb  
STANDARD 1H OBSERVE

exp1 s2pu1

| SAMPLE               |                | SPECIAL |          |
|----------------------|----------------|---------|----------|
| date                 | Jan 9 2009     | temp    | not used |
| solvent              | cdcl3          | gain    | not used |
| file                 | /export/home/~ | spin    | not used |
| nmr1/vnmr            | sys/data/~     | hst     | 0.008    |
| /Kerr/TPL-P-163-carb | pw90           | 11.100  |          |
| rb/CARBON.fid        | alfa           | 20.000  |          |
| ACQUISITION          |                | FLAGS   |          |
| sw                   | 25125.6        | il      | n        |
| at                   | 1.199          | in      | n        |
| np                   | 60270          | dp      | y        |
| fb                   | 13800          | hs      | nn       |
| bs                   | 64             |         |          |
| di                   | 1.000          | lb      | 1.00     |
| nt                   | 236            | fn      | not used |
| ct                   | 128            |         |          |
| TRANSMITTER C13      |                | SP      |          |
| tn                   | 18106.6        | wp      | 3.3      |
| sfreq                | 100.611        | rf1     | 18106.6  |
| tofr                 | 1552.6         | rf2     | 924.1    |
| tpwr                 | 5.59           | rfp     | 7746.2   |
| pw                   | 5.350          | lp      | 103.1    |
| DECOUPLER            |                | PLOT    |          |
| dn                   | H1             | wc      | 250      |
| dof                  | 0              | sc      | 0        |
| dm                   | yvy            | vs      | 91       |
| dmm                  | w              | th      | 8        |
| dpwr                 | 40             | ai      | no       |
| dmf                  | 8900           |         | ph       |

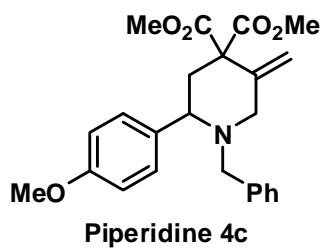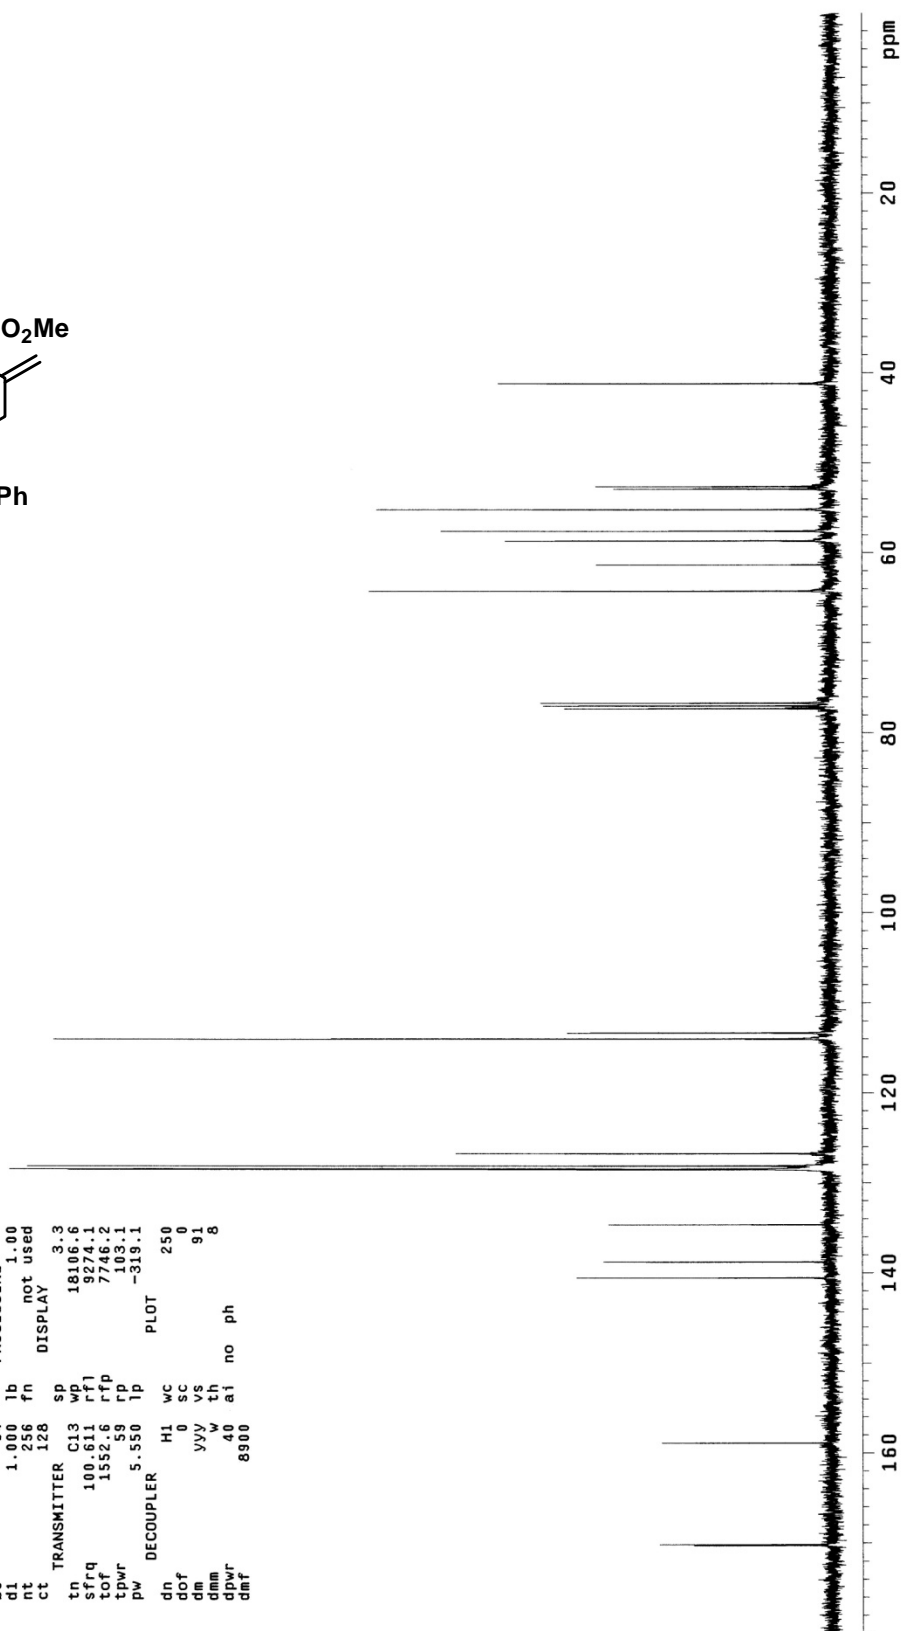

TPL-Q-53-H

exp1 PROTON

|             |             |               |          |
|-------------|-------------|---------------|----------|
| SAMPLE      |             | PRESATURATION |          |
| date        | Feb 11 2009 | satmode       | n        |
| solvent     | cdcl3       | wet           | n        |
| file        | cdcl3       | exp           | 26.0     |
| ACQUISITION |             | SPECIAL       |          |
| sw          | 6395.9      | gain          | not used |
| at          | 2.562       | spn           | 20       |
| np          | 32768       | hst           | 0.008    |
| fb          | 4000        | pw90          | 9.500    |
| bs          | 32          | alfa          | 6.600    |
| d1          | 1.000       | il            | FLAGS    |
| nt          | 64          | il            | n        |
| ct          | 64          | in            | n        |
| tn          | 399.762     | hs            | nn       |
| sfrq        | 399.762     | fn            | not used |
| tof         | 399.8       | fn            | not used |
| tpwr        | 59          | sp            | -3.3     |
| pw          | 4.750       | wp            | 3201.1   |
| dn          | DECOUPLER   | rf1           | 3685.9   |
| dof         | C13         | rfp           | 2902.3   |
| dm          | nnn         | rp            | -31.2    |
| decwave     | w40_hfcp2   | lp            | -21.4    |
| dpwr        | 34          | PLOT          |          |
| dmf         | 29412       | wc            | 250      |
|             |             | sc            | 0        |
|             |             | vs            | 181      |
|             |             | th            | 54       |
|             |             | ai            | cdc ph   |

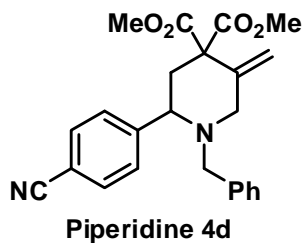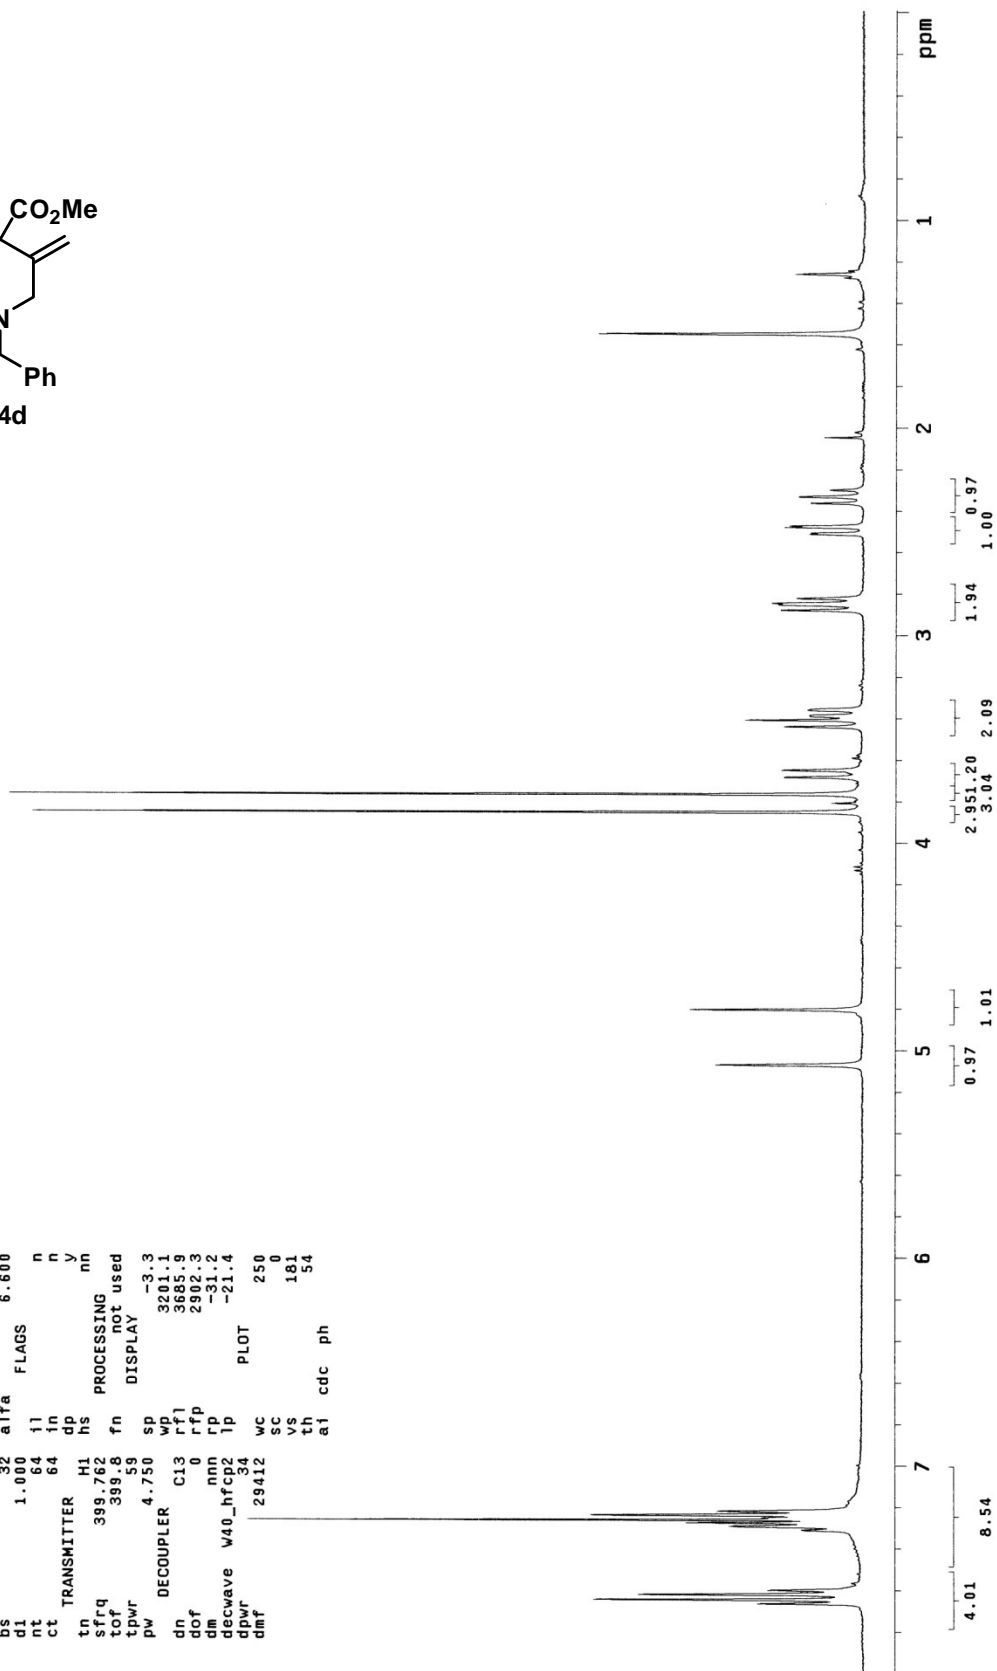

TPL-Q-53-carb

exp1 CARBON

|                     |                 |               |          |
|---------------------|-----------------|---------------|----------|
| SAMPLE              |                 | PRESATURATION |          |
| date                | Feb 11 2009     | satmode       | n        |
| solvent             | cdcl3           | wet           | SPECIAL  |
| file                | /home/kerr/vn~  | temp          | 26.0     |
| mrssys/data/terr/T~ |                 | gain          | not used |
| PL-Q-53-carb TPL-Q~ |                 | spin          | 20       |
| -53-carb_01/CARBON~ |                 | hst           | 0.008    |
| 01                  |                 | pw90          | 8.800    |
| ACQUISITION         | 25133.5         | alpha         | 10.000   |
| at                  | 1.304           | FLAGS         |          |
| np                  | 65536           | l1            | n        |
| fb                  | 14000           | l1n           | n        |
| bs                  | 8               | dp            | y        |
| dl                  | 1.000           | hs            | nn       |
| nt                  | 1000            | lb            | 0.50     |
| ct                  | 184             | fn            | not used |
| tn                  | TRANSMITTER C13 | DISPLAY       | -0.7     |
| sfrq                | 100.531         | sp            | 18102.3  |
| tof                 | 1530.6          | wp            | 9247.1   |
| tpwr                | 54              | rfl           | 7740.0   |
| pw                  | 4.400           | rtp           | -35.3    |
| dn                  | DECOUPLER H1    | lp            | -338.9   |
| dof                 | 0               | WC            | 250      |
| dm                  | yy              | SC            | 147      |
| decwave             | 30              | SS            | 12       |
| dpwr                | 9500            | tn            | nm       |
| dmr                 |                 | cdc           | ph       |

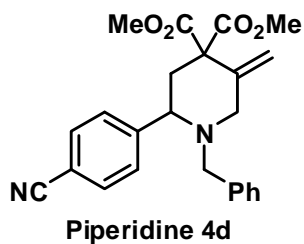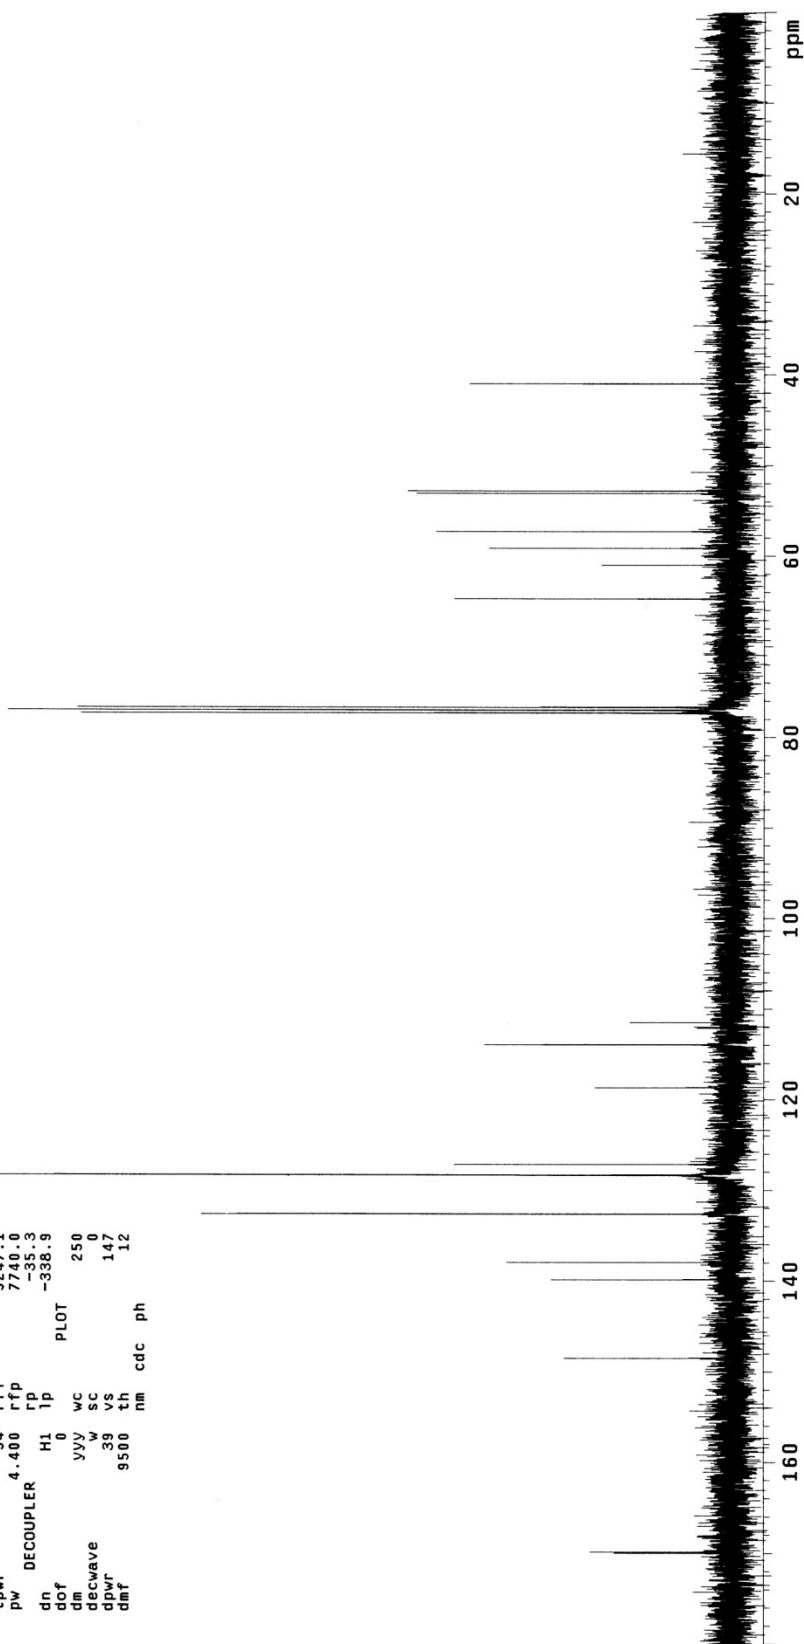

ABI-14.73C carbon of p-methyl ester  
STANDARD 1H OBSERVE

exp1 s2pu1

|             |               |         |          |
|-------------|---------------|---------|----------|
| SAMPLE      |               | SPECIAL |          |
| date        | Feb 25 2009   | temp    | not used |
| solvent     | Feb 25 cdc13  | gain    | not used |
| file        | export/home/~ | spin    | not used |
| nmr1        | 2502090504    | ns      | 0.008    |
| ACQUISITION | alpha         | ps0     | 13.500   |
| sw          | 6402.0        | alpha   | 20.000   |
| at          | 4.000         | il      |          |
| ns          | 51216         | in      | n        |
| fb          | not used      | dp      | y        |
| bs          | 1.000         | hs      |          |
| di          |               | fn      | not used |
| nt          | 8             | fn      | not used |
| ct          | TRANSMITTER   | 8       | DISPLAY  |
| tn          | H1            | sp      | -0.4     |
| sfreq       | 400.083       | wp      | 3600.4   |
| tof         | 424.3         | rfl     | 3704.3   |
| tdwr        | 58            | rfp     | 2904.6   |
| pw          | 6.750         | rp      | -144.6   |
| DECOUPLER   | C13           | lp      | -101.7   |
| dn          | 0             | wc      | 250      |
| dof         | 0             | sc      | 42       |
| dm          | nnn           | vs      | 54       |
| dmm         | c             | th      |          |
| dpwr        | 44            | ai      | cdc      |
| dmf         | 18500         | ph      |          |

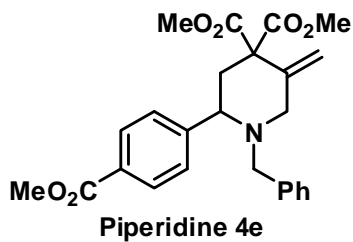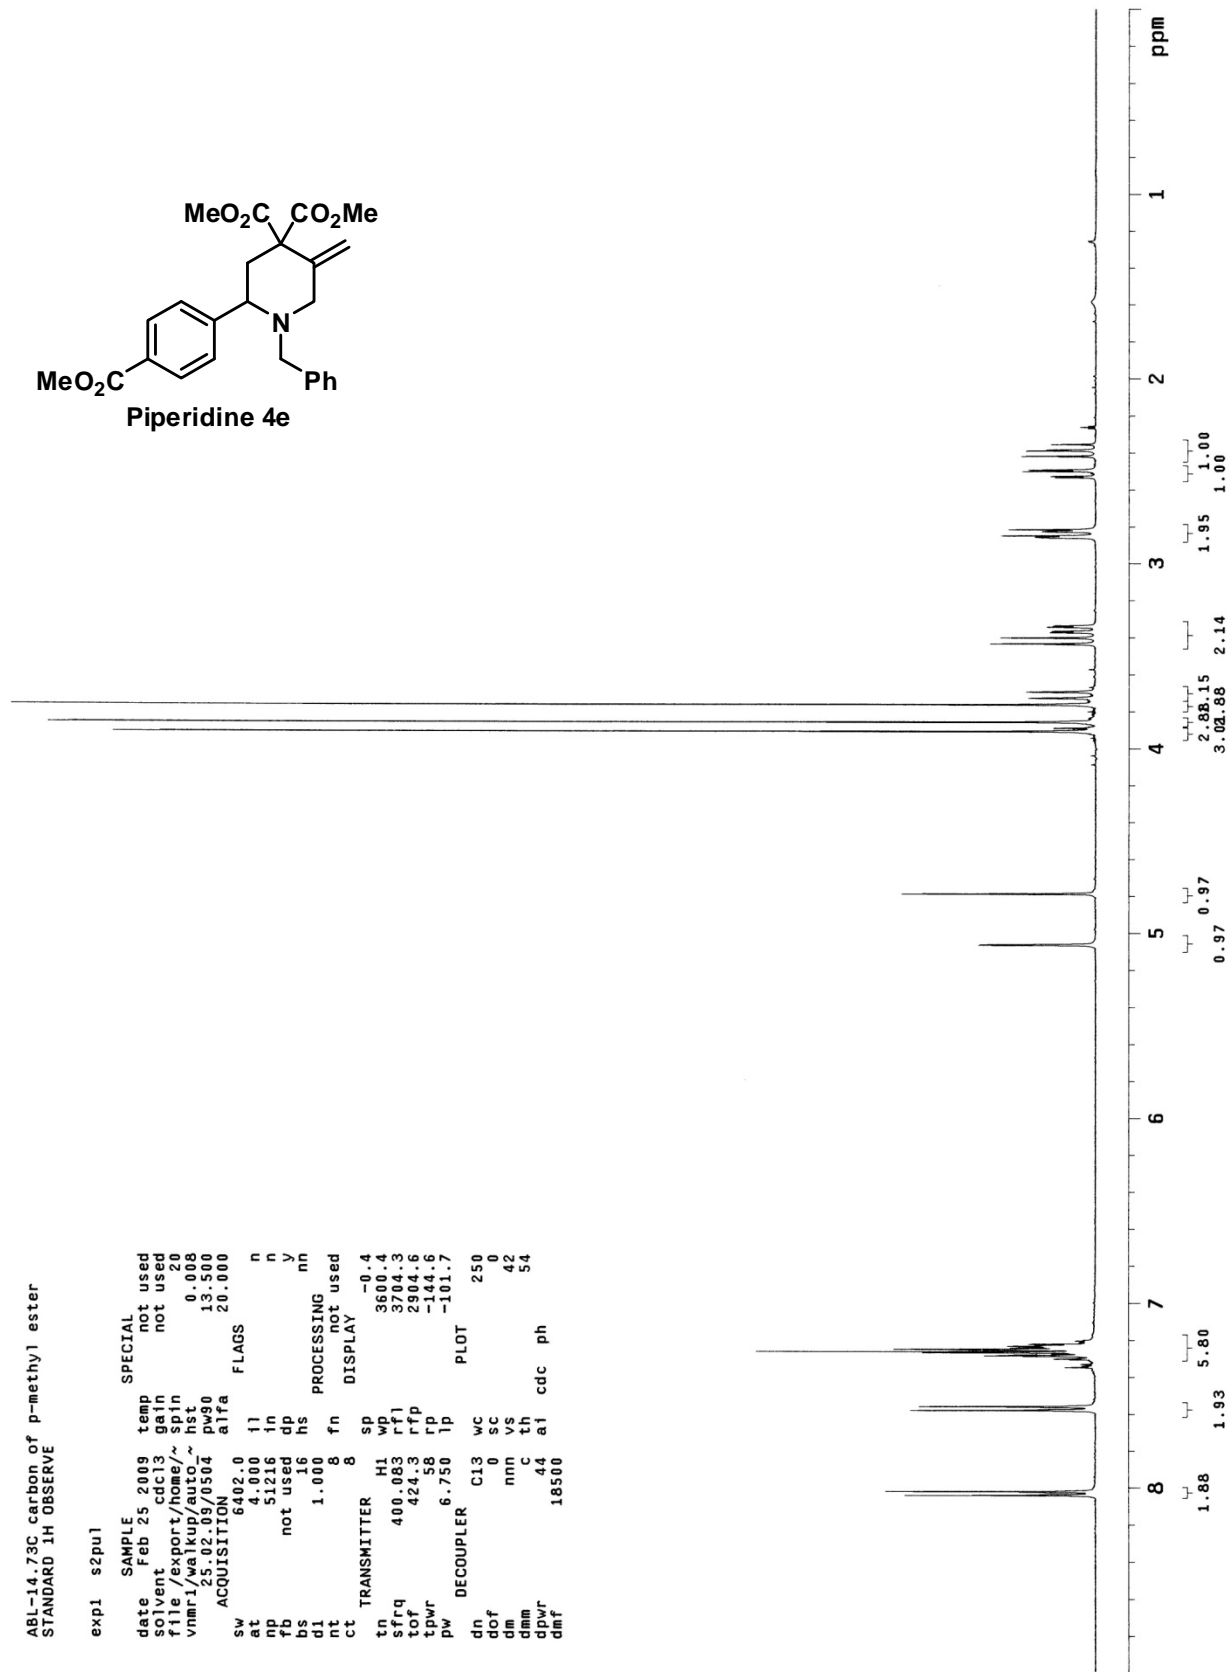



exp1 s2pu1

**Piperidine 4e**

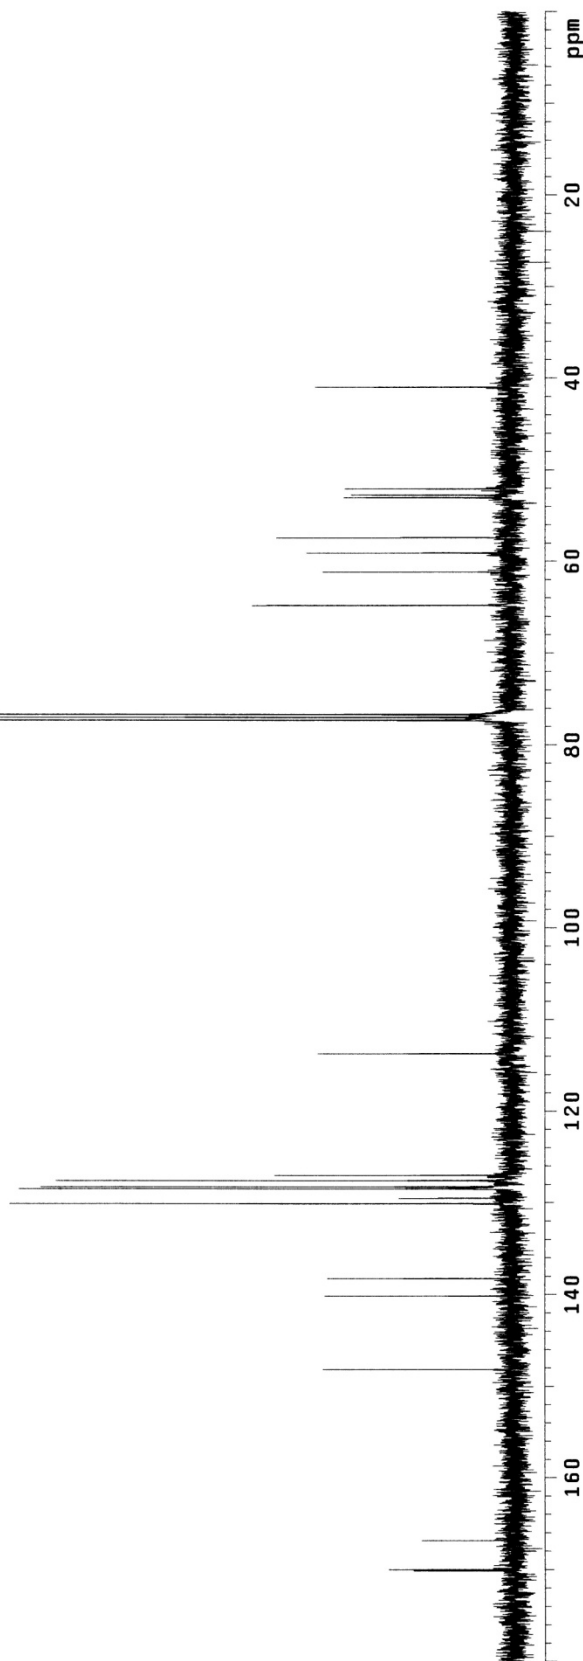

ABL-14\_35C2 proton of bromo adduct  
STANDARD 1H OBSERVE

```
exp2 s2pu1
SAMPLE
date Feb 10 2009 temp not used
solvent cdcl3 gain not used
file /export/home/~ spin 20
nmr1/vnmrSYS/data~ hst 0.008
/Kerr/ABL-14_35C2/~ pw90 13.500
PROTON.fid alfa 20.000
ACQUISITION
sw 6402.0 il n
at 4.000 in n
np 51216 dp y
fb not used hs nn
bs 16 PROCESSING
dl 1.000 fn not used
nt 8 DISPLAY
ct 8 sp 3.8
TRANSMITTER
tn H1 wp 3196.7
sfrq 400.083 rfl 3704.1
tof 424.3 rfp 2904.6
tpwr 58 lp -145.9
pw 6.750 PLOT -98.6
DECOUPLER
dn C13 wc 250
dof 0 sc 0
dm nnn th 41
dmm c a1 54
dpwr 44
dmf 18500
```

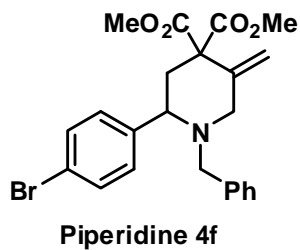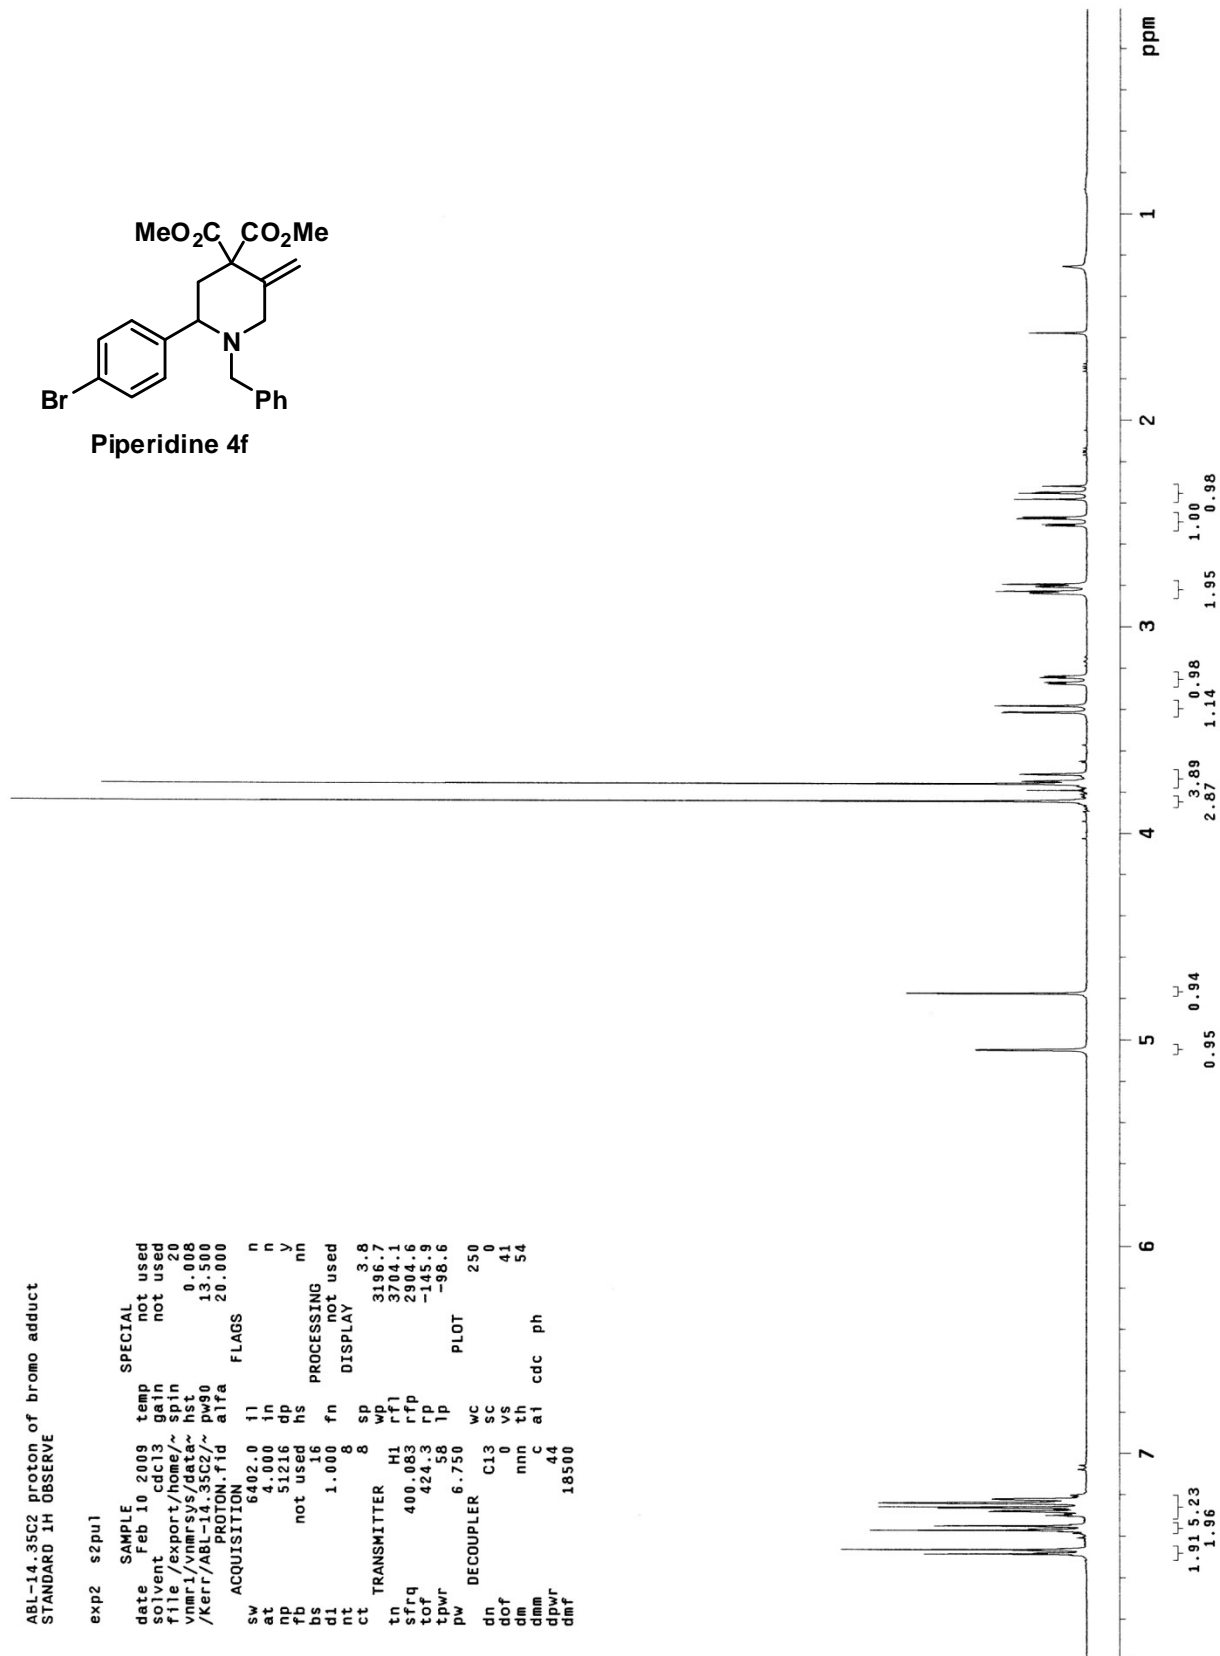

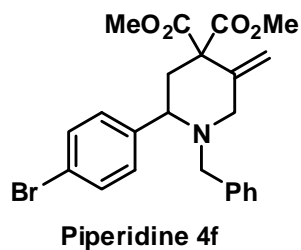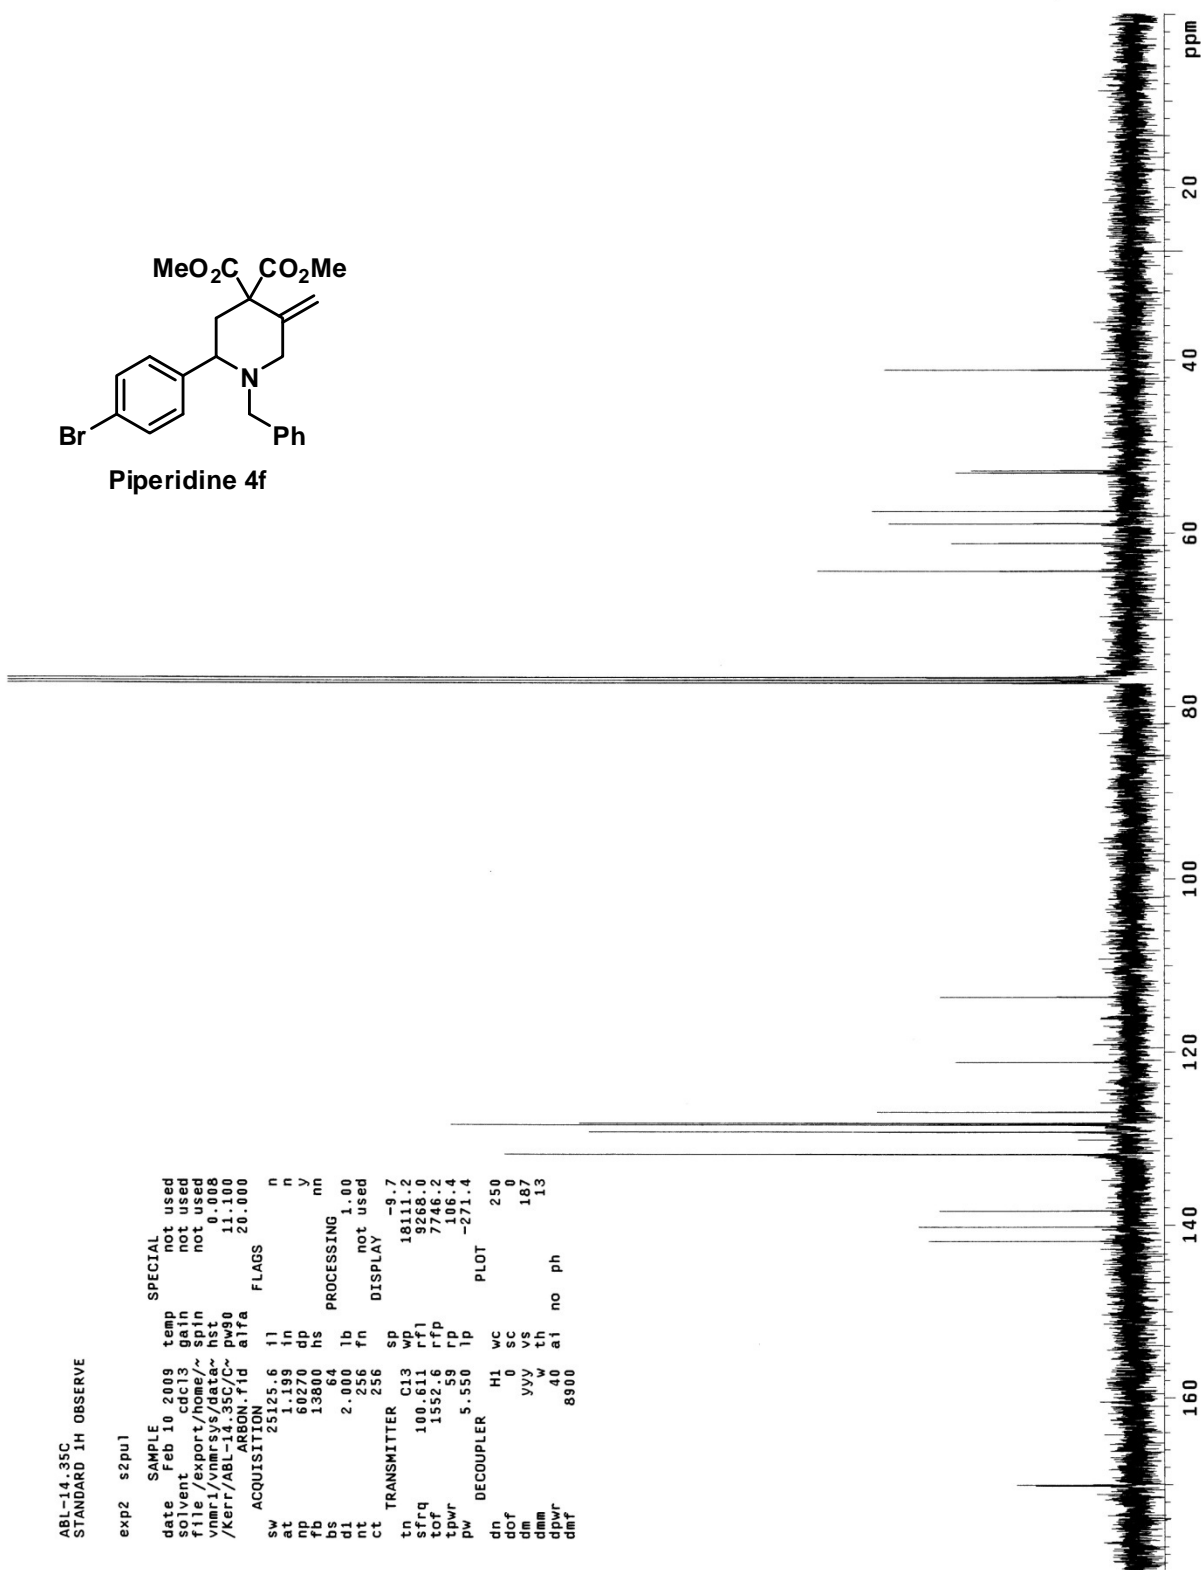

TPI-Q-15-ag  
STANDARD 1H OBSERVE

```

exp4 s2pu1
SAMPLE
date Jan 19 2009 temp not used
solvent cdc13 gain not used
file/export/home/~ hst 20
vnari/walkup/auto/~ hst 0.008
19.01.09/0223 pw90 13.500
ACQUISITION alfa 20.000
SW 6402.0
at 4.000 il n
np 51216 in n
fb not used dp y
bs 16 hs
d1 1.000 PROCESSING nn
nt 8 fn not used
ct 8 DISPLAY
TRANSMITTER SP 1.9
tn H1 WD 3196.5
sfrq 400.083 rf1 3702.0
tof 424.3 rfp 2904.6
tpwr 58 rp -152.5
pw 6.750 lp -94.7
DECOUPLER C13 WC 250
dn 0 SC 0
dm nnn vs 35
dmm c th 54
dpwr 44 a1 cdc ph
dmf 18500

```

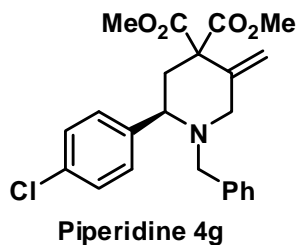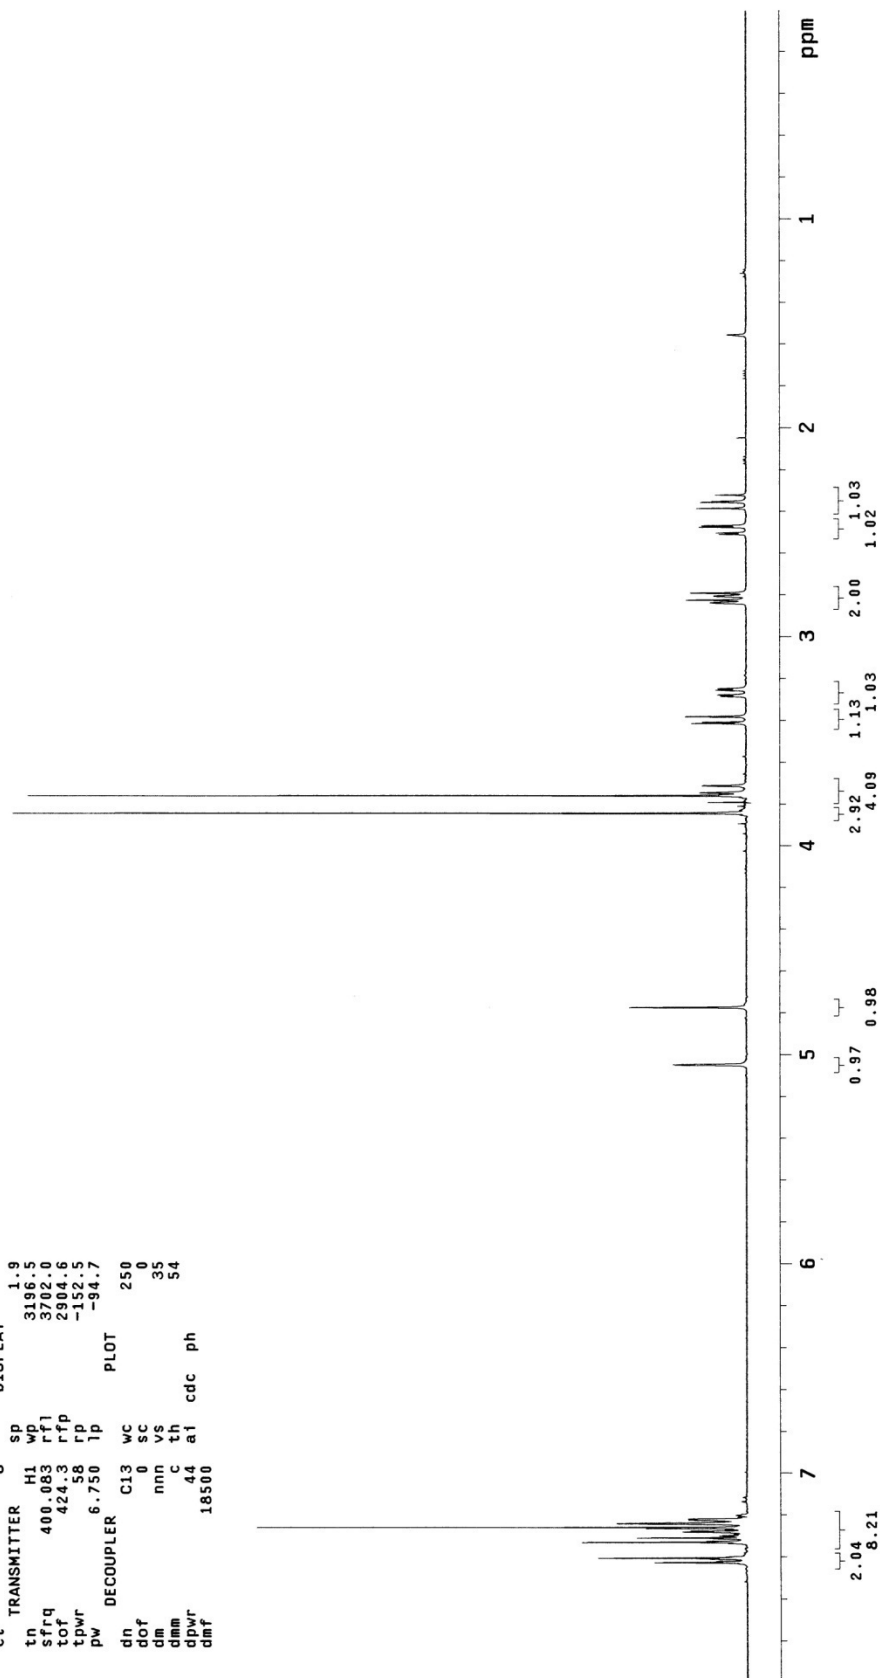

TPL-Q-15-carbon  
STANDARD 1H OBSERVE

exp4 s2pu1

|                   |                |        |          |
|-------------------|----------------|--------|----------|
| date              | Jan 19 2009    | temp   | not used |
| solvent           | cdcl3          | gain   | not used |
| file              | /export/home/~ | spin   | not used |
| nmr1/wakeup/auto~ | hst            | 0.008  |          |
| 19.01.09/0222     | pw90           | 11.100 |          |
| ACQUISITION       | alpha          | 20.000 |          |
| sw                | 25125.6        |        |          |
| at                | 1.199          | tl     | n        |
| tp                | 60270          | tn     | y        |
| fb                | 135800         | dp     |          |
| bs                | 64             | hs     | mn       |
| ds                | 1.004          |        |          |
| dt                | 256            | lb     | 1.00     |
| nt                | 64             | fn     | not used |
| ct                | TRANSMITTER    | C13    | DISPLAY  |
| tn                | 100.611        | sp     | -8.9     |
| sfreq             | 1552.6         | wp     | 20139.3  |
| tof               | 59             | rf1    | 9274.1   |
| tpwr              | 5.550          | rfp    | 7746.2   |
| pw                | DECOUPLER      | rp     | 123.9    |
| dn                | H1             | lp     | -319.7   |
| dof               | 0              | wc     | 250      |
| dm                | yyv            | sc     | 0        |
| dmm               | w              | vs     | 58       |
| dpwr              | 40             | th     | 5        |
| dmf               | 8900           | ai     | no ph    |

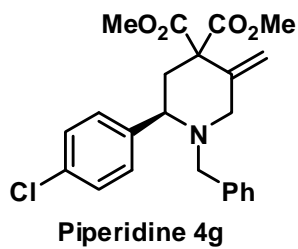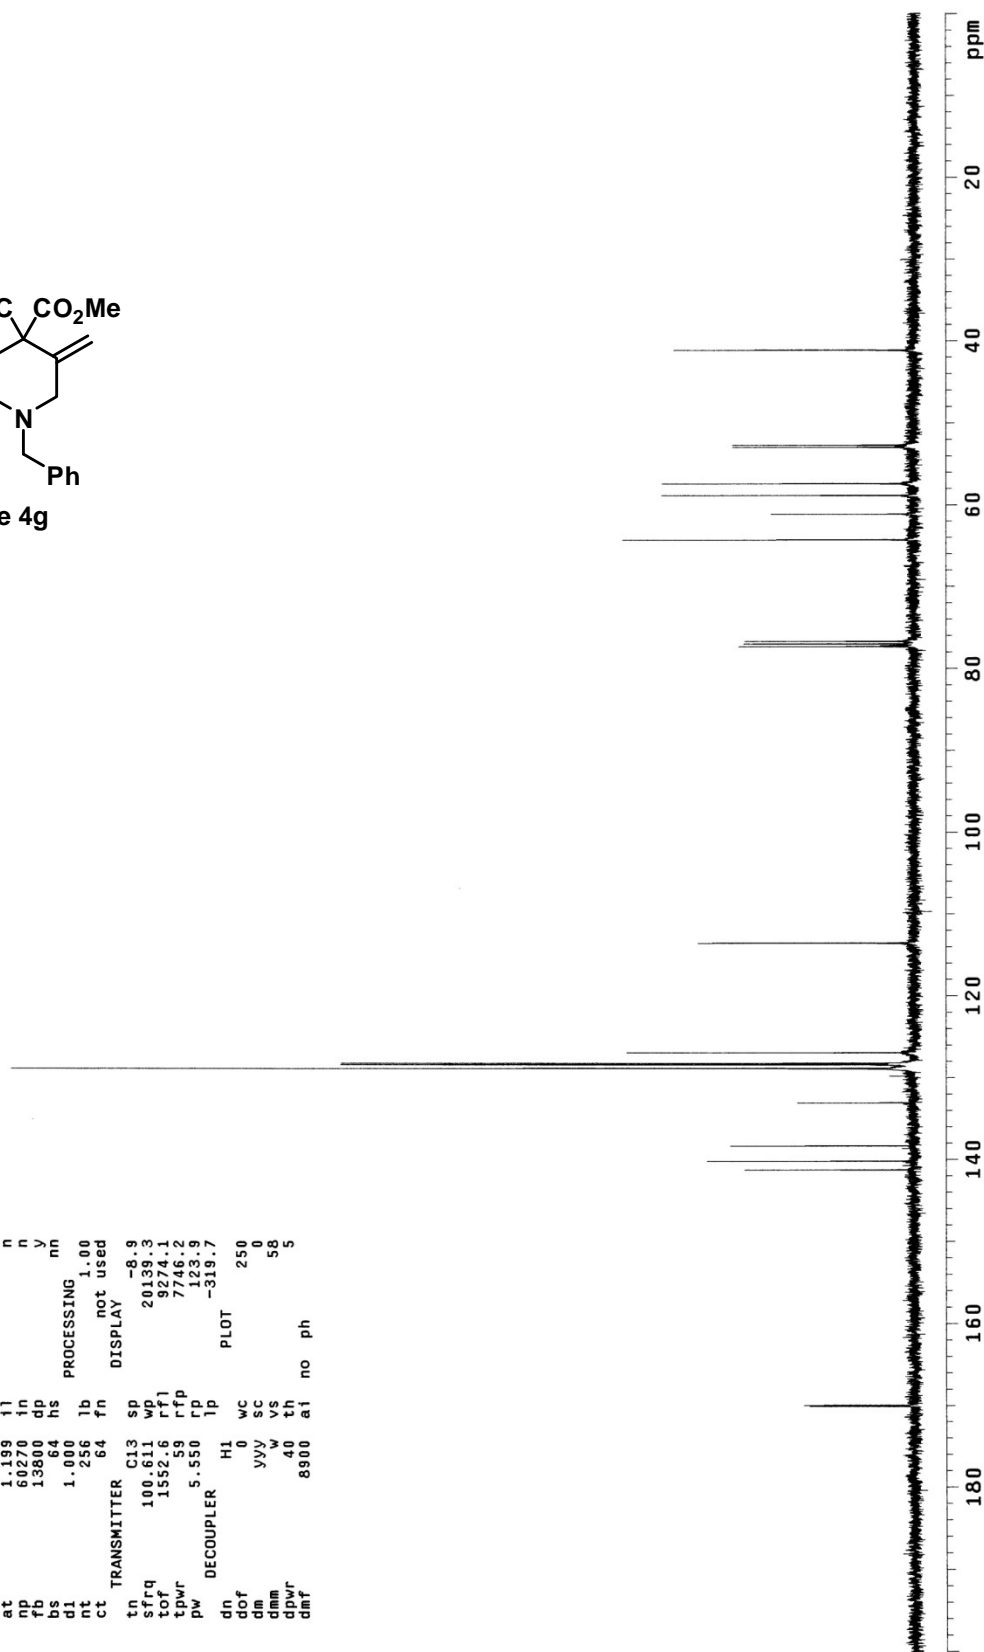

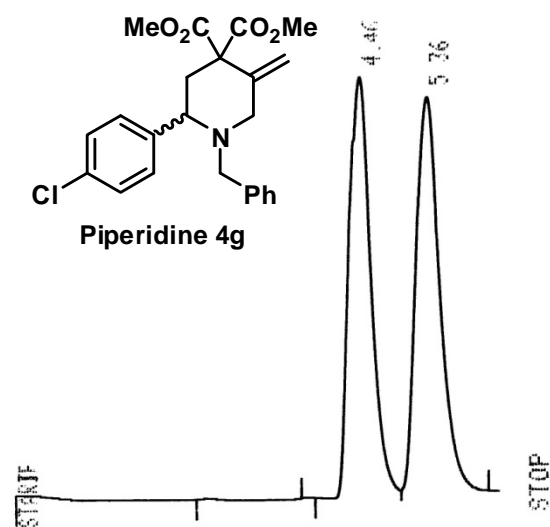

| AREA% | RT     | AREA   | TYPE | AR/HT | AREA%  |
|-------|--------|--------|------|-------|--------|
| 4.46  | 240470 | 48.467 | PV   | 0.322 | 48.467 |
| 5.36  | 255680 | 51.533 | VB   | 0.362 | 51.533 |

TOTAL AREA= 496150  
MUL FACTOR= 1.0000E+00

RUN # 10

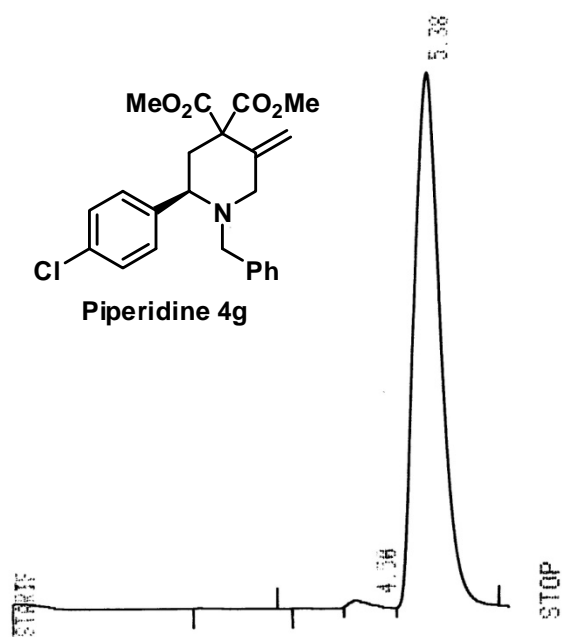

| AREA% | RT     | AREA   | TYPE | AR/HT | AREA%  |
|-------|--------|--------|------|-------|--------|
| 4.50  | 4655   | 1.237  | PP   | 0.318 | 1.237  |
| 5.38  | 371590 | 98.763 | PB   | 0.389 | 98.763 |

TOTAL AREA= 376250  
MUL FACTOR= 1.0000E+00

RUN # 7

ABL-14.09D  
STANDARD 1H OBSERVE

```

exp5 s2pul
SAMPLE
date Jan 13 2009 temp not used
solvent cdc13 gain not used
file /export/home/~spin 20
nmr1/vnmrsvs/data~ hst 0.008
/Kerr/ABL-14.09D/p~ pw90 13.500
ROTON.fid alfa 20.000
ACQUISITION
sw 6402.0 11 n
at 4.000 1n n
np 51216 dp y
fb not used hs
bs 16
d1 1.000 fn not used
nt 8
ct 8 sp
TRANSMITTER H1 wp 3196.5
rf1 3703.1
strq 400.083 rfp 2904.6
tof 424.3 rp -148.1
tpwr 58 lp -106.3
pw 6.750 PLOT
DECOUPLER C13 wc 250
dn 0 sc 0
dof 0 vs 58
dm nnn th cdc ph
dmm c
dpwr 44
dnt 18500
  
```

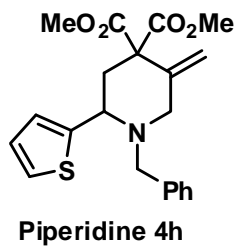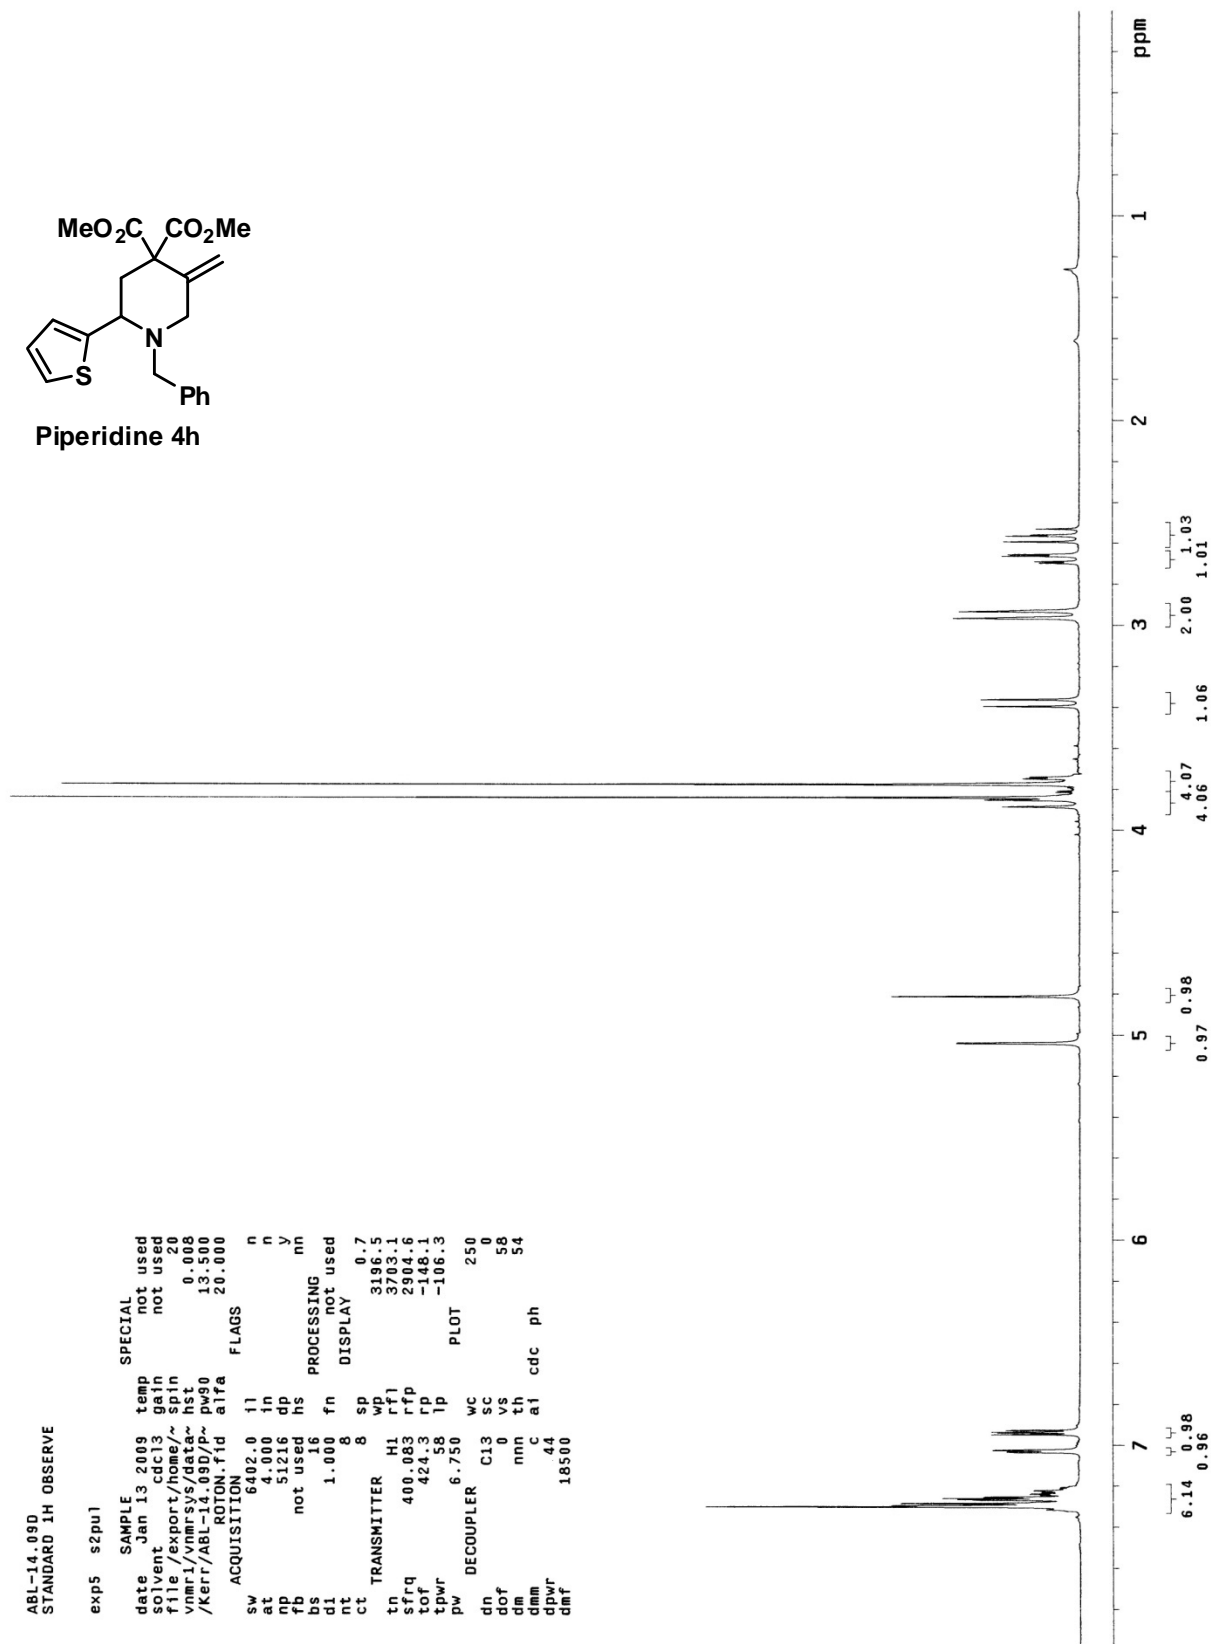

ABL-14.09C  
STANDARD 1H OBSERVE

exp1 s2pu1

| SAMPLE      |                | SPECIAL |          |
|-------------|----------------|---------|----------|
| date        | Jan 12 2009    | temp    | not used |
| solvent     | cdcl3          | gain    | not used |
| file        | /export/home/~ | spin    | not used |
| nmr1        | /walkup/autot~ | hst     | 0.008    |
|             | 12.01.09/0221  | pw90    | 11.100   |
|             |                | alpha   | 20.000   |
| ACQUISITION |                |         |          |
| sw          | 25125.6        | flags   |          |
| at          | 1.199          | l1      | n        |
| np          | 60270          | in      | n        |
| fb          | 13800          | dp      | y        |
| bs          | 64             | hs      | nn       |
| d1          | 1.000          |         |          |
| nt          | 1000           | lb      | 1.00     |
| ct          | 192            | fn      | not used |
| TRANSMITTER |                |         |          |
| tn          | c13            | sp      | 1.8      |
| sfreq       | 100.611        | wp      | 18107.4  |
| tor         | 1552.6         | rfl     | 7272.6   |
| tpwr        | 5.550          | rfp     | 7746.2   |
| pw          | 5.550          | lp      | 1210.6   |
| DECOUPLER   |                |         |          |
| dn          | H1             | pl      | -322.0   |
| dof         | 0              | wc      | 250      |
| dnn         | yyv            | sc      | 0        |
| dmm         | ys             | vs      | 126      |
| dpr         | 40             | th      | 9        |
| dpr         | 8900           | at      | no       |
| dmf         |                | ph      |          |

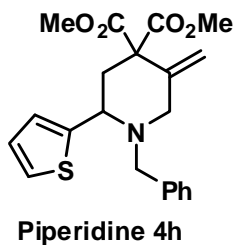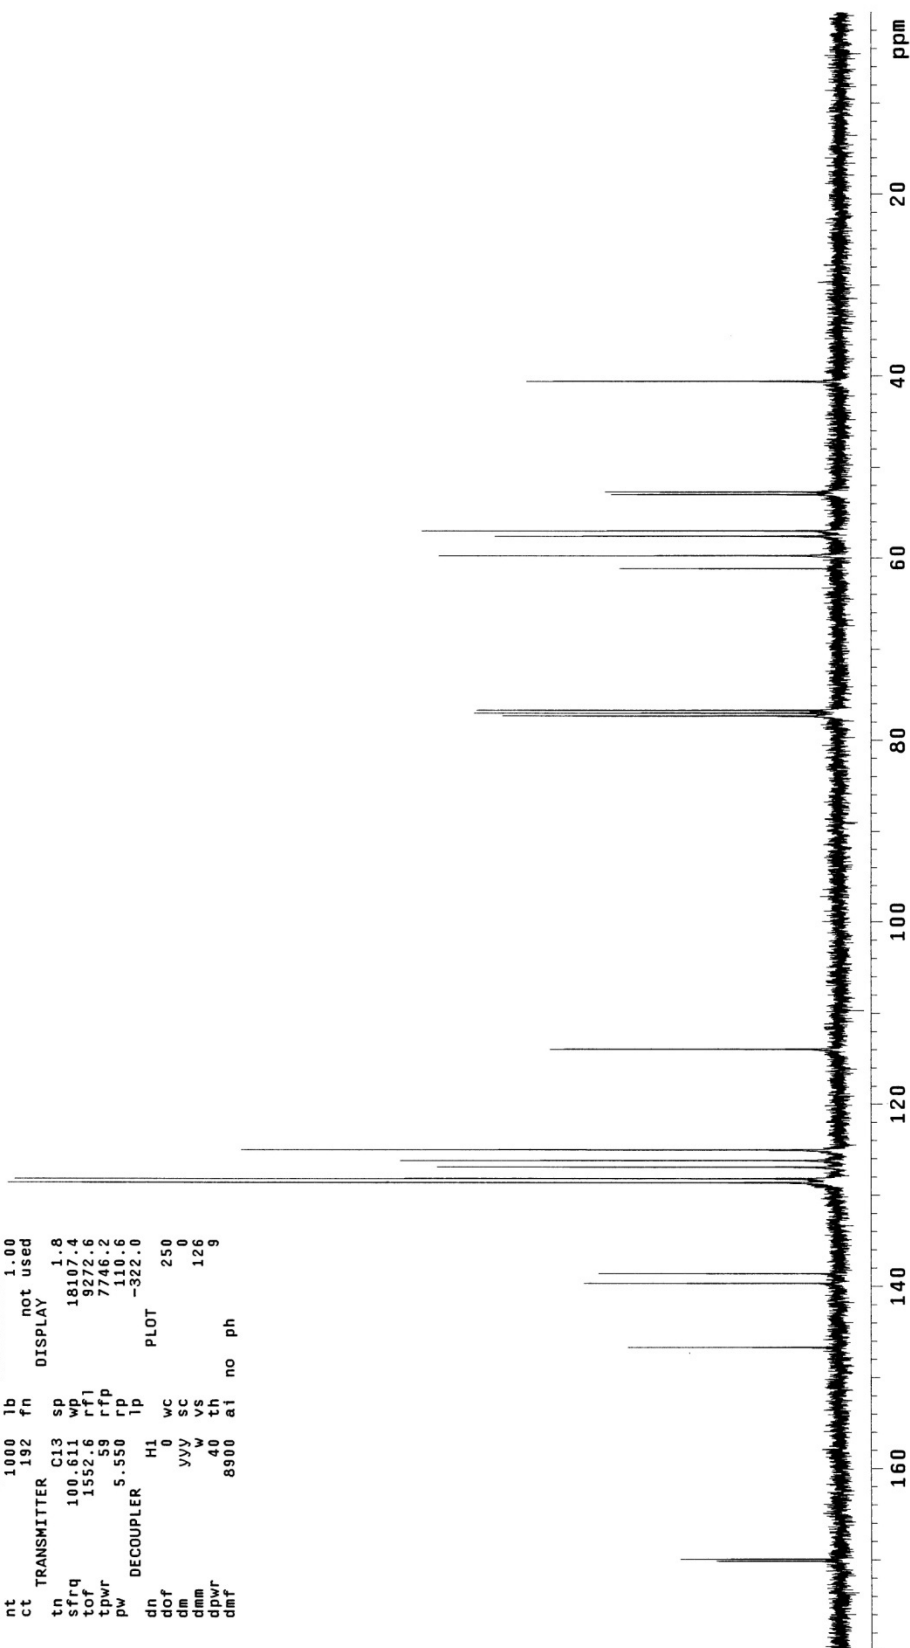



exp7 s2pu1

| SAMPLE              |                |      | SPECIAL |      |          |
|---------------------|----------------|------|---------|------|----------|
| date                | Jan 30 2009    | temp | gain    | spin | not used |
| solvent             | cdcl3          |      |         |      | 0.20     |
| file                | /export/home/~ |      |         |      | 0.008    |
| nmr1/vnmr2/data/~   | hst            |      |         |      | 13.500   |
| /Kerr/ABF~14.57C/p~ | pw50           |      |         |      | 20.000   |
| ROTOR/ABF           | alpha          |      |         |      | FLAGS    |
| ACQUISITION         |                |      |         |      |          |
| sw                  | 6402.0         | 1    |         |      | n        |
| np                  | 4.000          | fn   |         |      | n        |
| at                  | 5126           | dp   |         |      | y        |
| bs                  | not used       | hs   |         |      | nn       |
| fs                  | 16             |      |         |      | nn       |
| rd                  | 1.000          | fn   |         |      | not used |
| nt                  | 8              |      |         |      | DISPLAY  |
| ct                  | 8              | sp   |         |      | 0.5      |
| TRANSMITTER         |                |      |         |      |          |
| tn                  | H1             | wp   |         |      | 3197.3   |
| srq                 | 400.063        | rfl  |         |      | 3703.5   |
| tof                 | 424.3          | rfp  |         |      | 2904.6   |
| tpwr                | 58             | lp   |         |      | -152.2   |
| pw                  | 6.750          | rp   |         |      | -88.1    |
| DECOUPLER           |                |      |         |      |          |
| dn                  | C13            | wc   |         |      | 250      |
| dof                 | 0              | sc   |         |      | 0        |
| dm                  | nnn            | vs   |         |      | 56       |
| dmm                 | c              | th   |         |      | 54       |
| dppr                | 44             | ai   |         |      | cdc      |
| dmp                 | 18500          | ph   |         |      |          |

**Piperidine 4i**

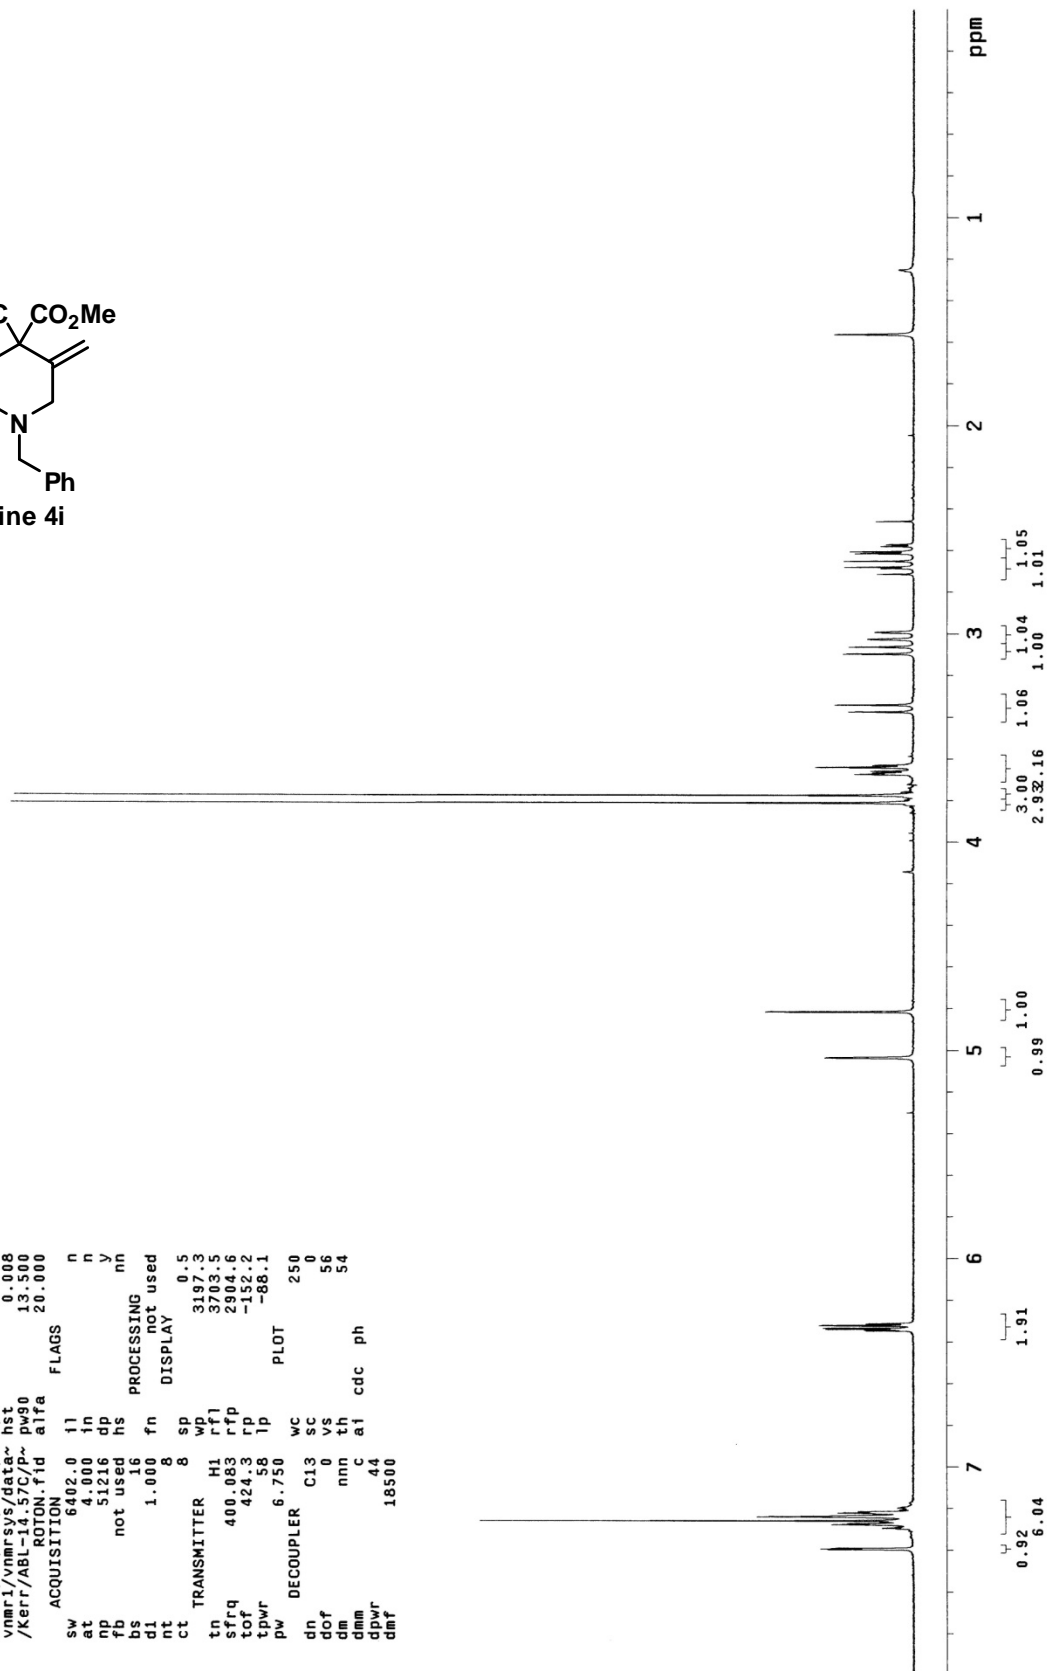

ABL-14-57-C  
STANDARD 1H OBSERVE

exp17 s2pul

| SAMPLE      |                | SPECIAL |          |
|-------------|----------------|---------|----------|
| date        | Jan 30 2009    | temp    | not used |
| solvent     | cdcl3          | gain    | not used |
| file        | /export/home/~ | spin    | not used |
| vnarl       | /walkup/auto/~ | hst     | 0.008    |
|             | 30.01.09/0217  | pw90    | 11.100   |
|             |                | alpha   | 20.000   |
| ACQUISITION |                | FLAGS   |          |
| sw          | 25125.6        |         |          |
| at          | 1.199          | fl      | n        |
| np          | 60270          | in      | n        |
| fb          | 13800          | dp      | y        |
| bs          | 64             | hs      | nn       |
| d1          | 1.000          |         |          |
| nt          | 256            | lb      | 1.00     |
| ct          | 64             | fn      | not used |
| TRANSMITTER |                | DISPLAY |          |
| tn          | C13            | sp      | -1.3     |
| sfrq        | 100.611        | wp      | 20133.9  |
| tof         | 1552.6         | rfl     | 9276.4   |
| tpwr        | 59             | rfp     | 7746.2   |
| pw          | 5.550          | rp      | 107.5    |
| DECOUPLER   |                | lp      | -299.1   |
| dn          | H1             |         |          |
| dof         | 0              | wc      | 250      |
| dm          | yvy            | sc      | 0        |
| dmm         | w              | vs      | 77       |
| dpr         | 40             | th      | 9        |
| dmt         | 8900           | al      | no ph    |

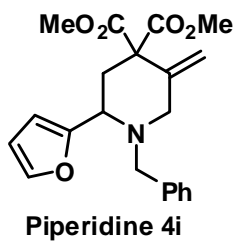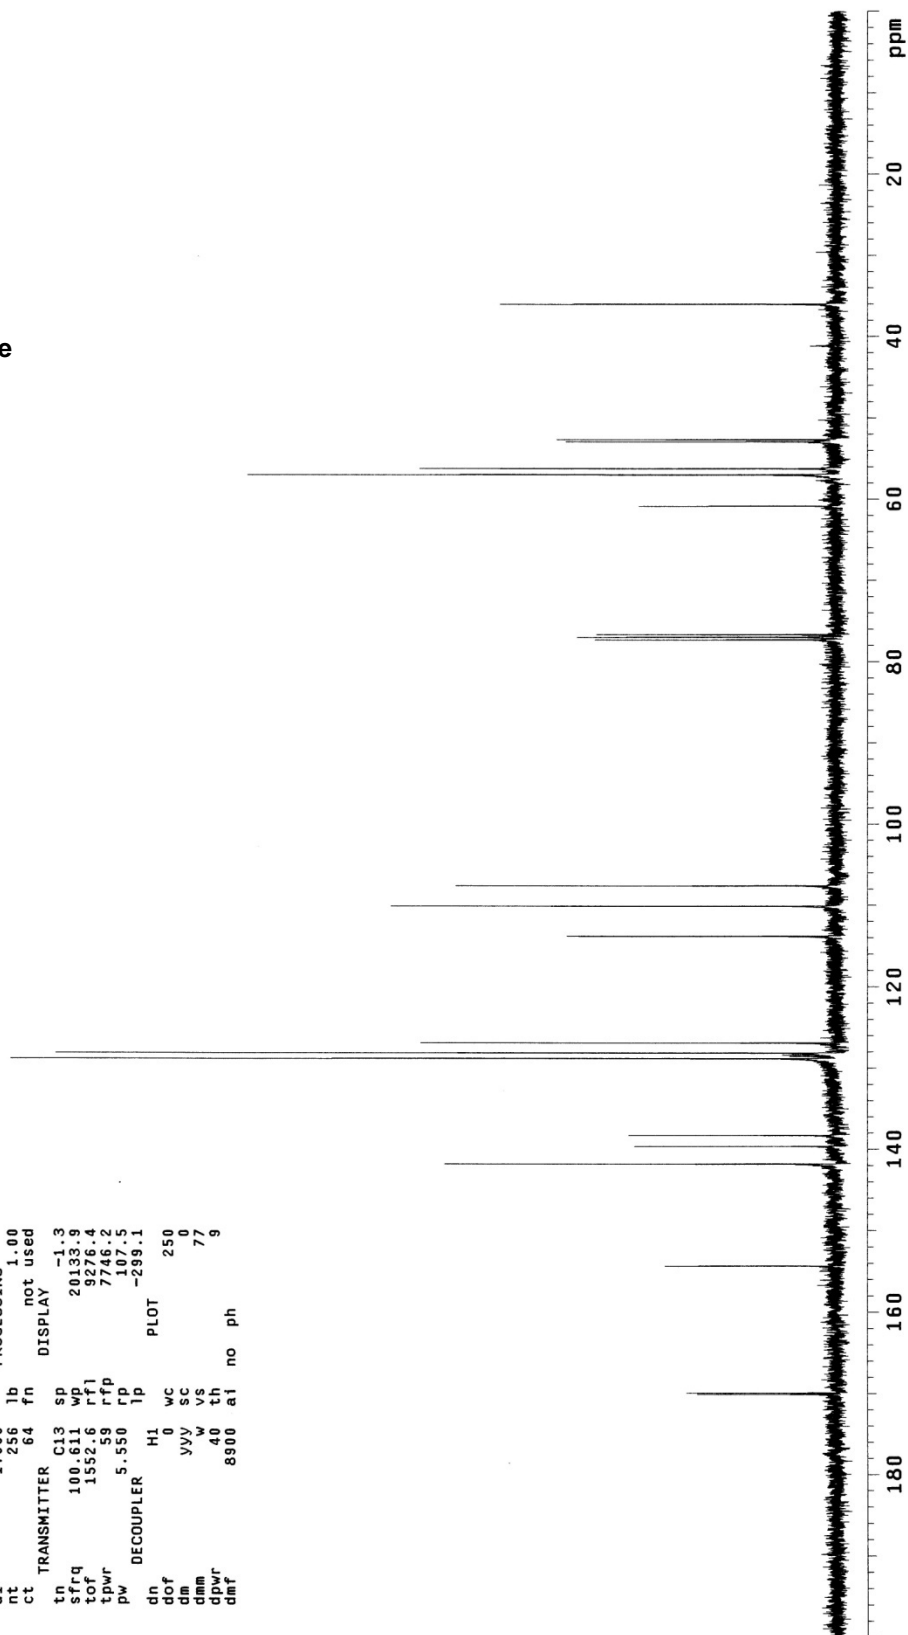

ABL-14.11C  
STANDARD 1H OBSERVE

```

exp1 s2pul
date Jan 12 2009 temp not used
solvent cdcl3 gain not used
file /export/home/~ spin 0.008
nmr1/walkup/auto~ hst 13.500
12.01.05/0405 pw50 20.000
ACQUISITION alfa 20.000
sw 6402.0 il n
at 4.000 in n
fp 31216 tn n
fb not used dp y
bs 16 hs
dl 1.000 fn not used
nt 8 not used
Ct TRANSMITTER H1 SP
tn 3597.2
sfreq 400.083 rf1 800.5
tof 424.3 rfp -152.2
tpwr 6.750 rp -86.8
pw DECOUPLER C13 wc 250
dn dof 0 sc 57
dm nnn vs 54
dmm c th
dpwr 44 a1 cdc ph
dmf 18500

```

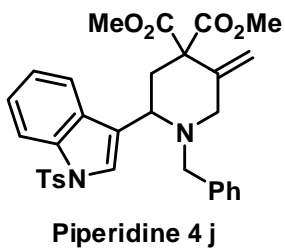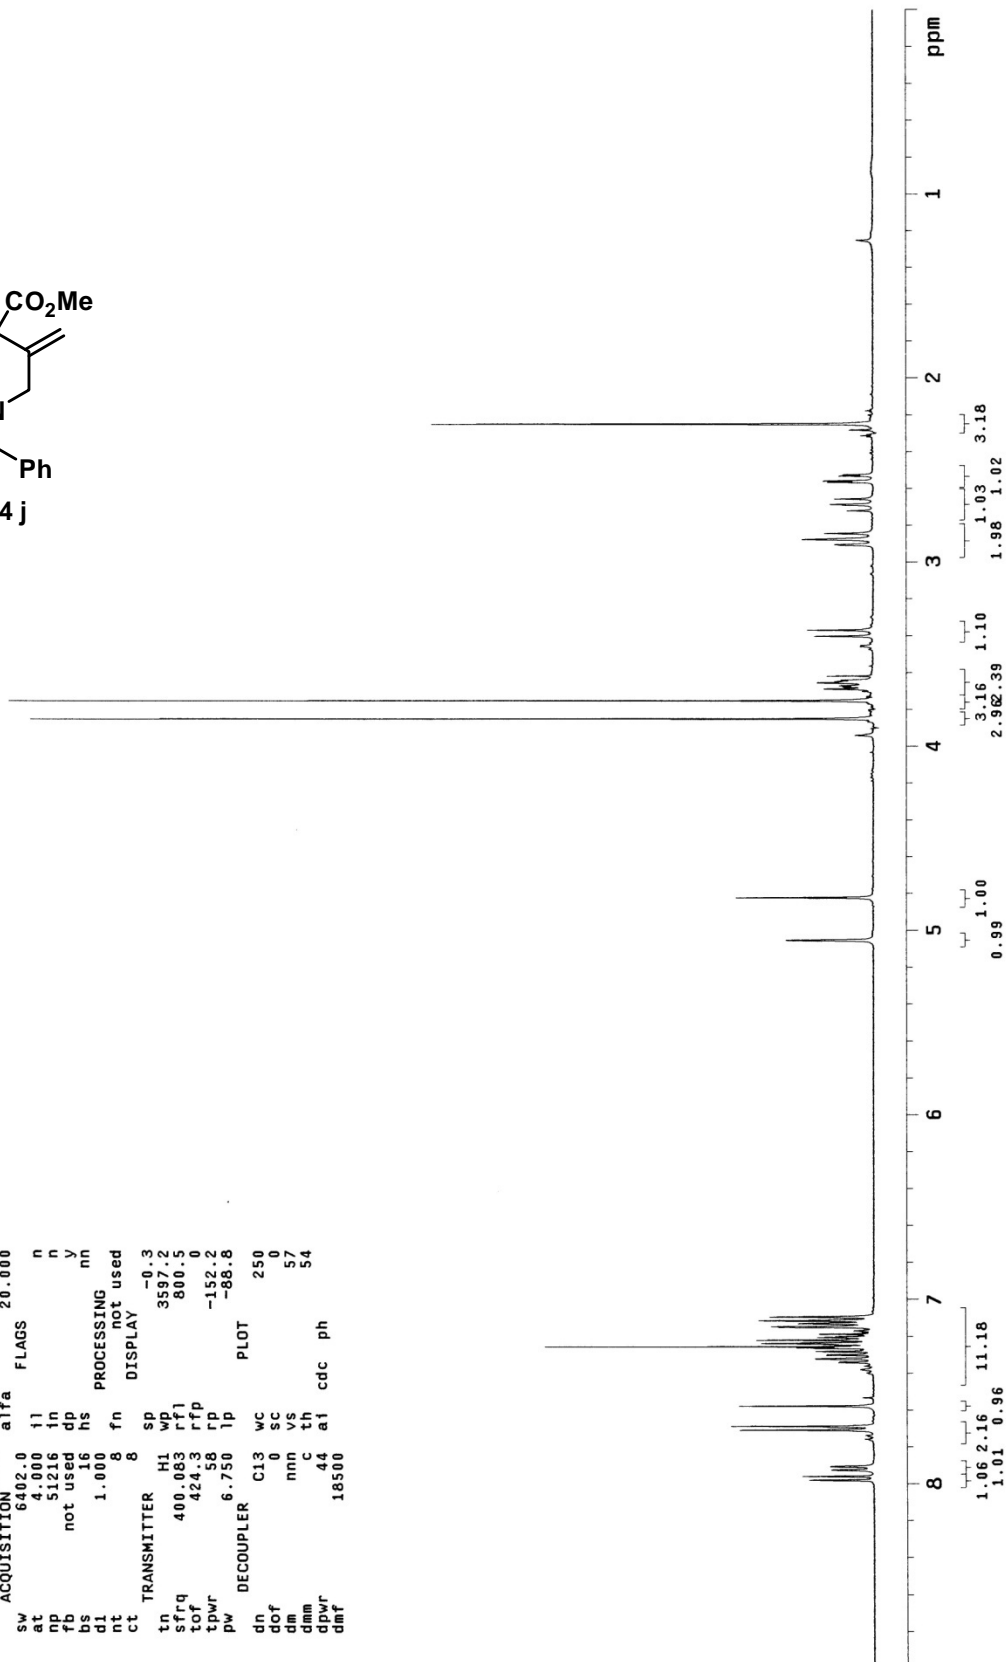

ABL-14.11C  
STANDARD 1H OBSERVE

exp1 s2pu1

| SAMPLE          |                | SPECIAL  |          |
|-----------------|----------------|----------|----------|
| date            | Jan 12 2009    | temp     | not used |
| solvent         | cdcl3          | gain     | not used |
| file            | /export/home/~ | spin     | not used |
| nmr1            | walkup/autoc~  | hst      | 0.008    |
| 12.01.09/0410   | pw90           | 11.100   |          |
| ACQUISITION     | alpha          | 20.000   |          |
| sw              | 25125.6        | FLAGS    |          |
| at              | 1.199          | l        | n        |
| np              | 60270          | in       | n        |
| fb              | 13800          | dp       | y        |
| bs              | 64             | hs       |          |
| d1              | 1.000          | lb       |          |
| nt              | 1000           | fn       | 1.00     |
| ct              | 1000           | not used |          |
| TRANSMITTER C13 |                | SP       | 7.2      |
| tn              | 100.611        | wf       | 18107.4  |
| sfrq            | 155216         | rf       | 3267.2   |
| tofr            | 155216         | rfp      | 7746.2   |
| tpwr            | 5.550          | rp       | 106.4    |
| DECOUPLER H1    |                | lp       | -323.1   |
| dn              | 0              | wc       | 250      |
| dof             | 0              | vy       | sc       |
| dm              | 0              | vs       | 323      |
| dmm             | 40             | th       | 14       |
| dpwr            | 8900           | ai       | no       |
| dmf             |                | ph       |          |

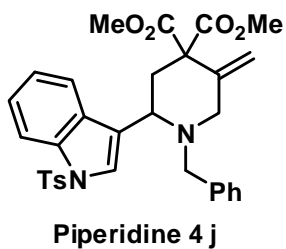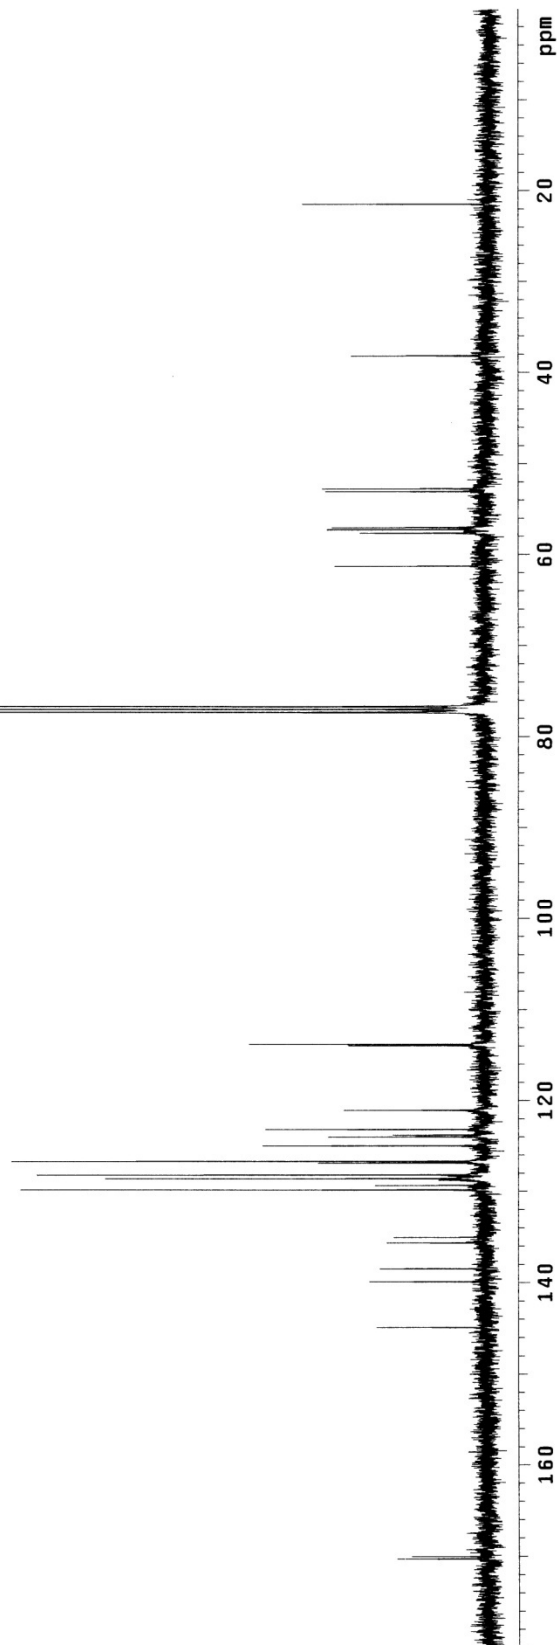

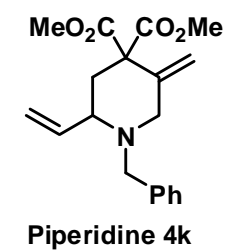

TPL-P-143

exp1 PROTON

|         |             |               |          |
|---------|-------------|---------------|----------|
| date    | May 19 2009 | PRESATURATION | n        |
| solvent | cdc13       | satmode       | n        |
| file    | cdc13       | wet           | SPECIAL  |
| sw      | 6396.4      | temp          | 25.0     |
| at      | 2.561       | gain          | not used |
| np      | 32768       | spin          | 20       |
| fb      | 4000        | hst           | 0.008    |
| bs      | 32          | pw90          | 9.500    |
| d1      | 1.000       | alfa          | 6.600    |
| nt      | 8           | il            | FLAGS    |
| ct      | 8           | in            | n        |
| tn      | 8           | dp            | n        |
| tn      | 8           | hs            | y        |
| sfrq    | 399.762     | fn            | nn       |
| tof     | 399.8       | fn            | not used |
| tpwr    | 59          | DISPLAY       | -3.1     |
| pw      | 4.750       | sp            | 3197.8   |
| dn      | C13         | wp            | 3686.2   |
| dof     | 0           | rfl           | 2902.3   |
| dm      | nnn         | rp            | -131.3   |
| decwave | w40_hfcp2   | lp            | -20.8    |
| dpwr    | 34          | PLOT          |          |
| dmf     | 29412       | wc            | 250      |
|         |             | sc            | 0        |
|         |             | vs            | 33       |
|         |             | th            | 54       |
|         |             | ai            | cdc      |
|         |             |               | ph       |

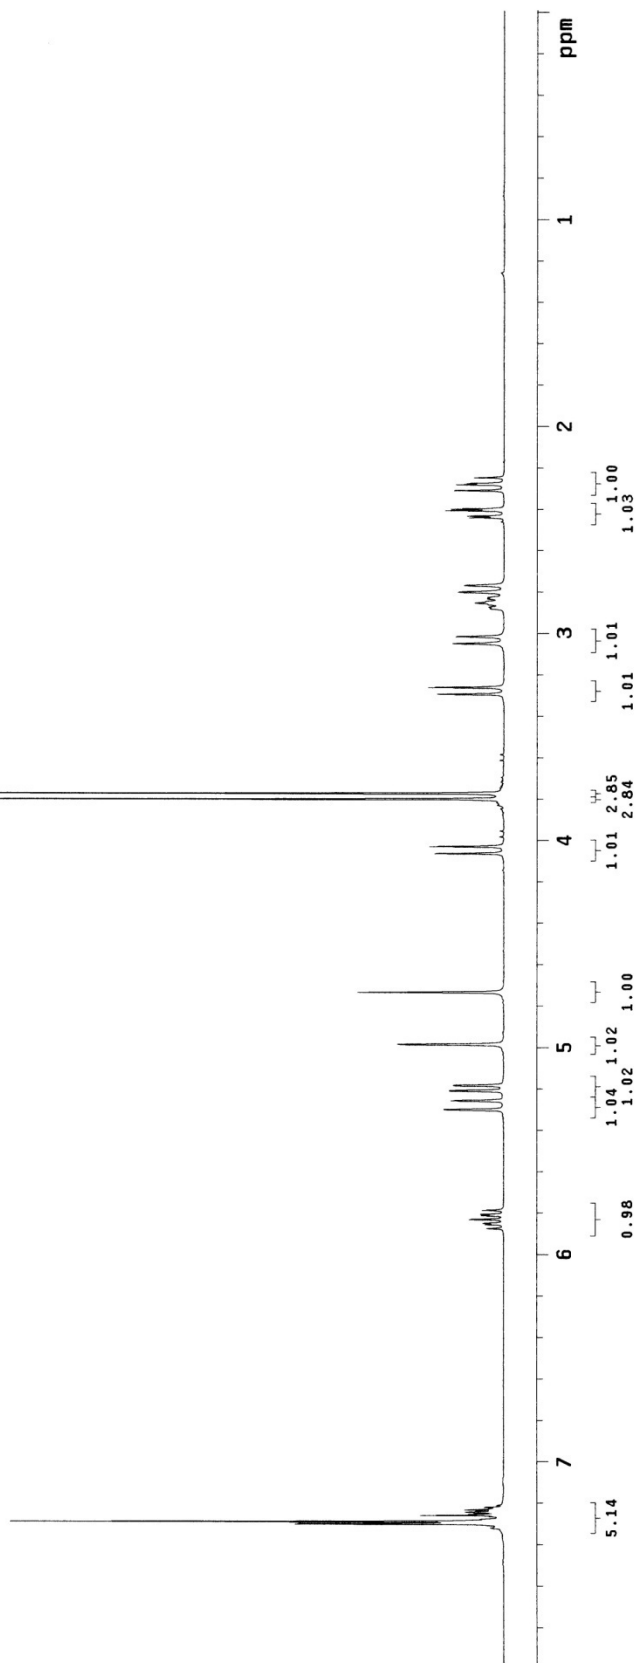

TPL-P-137  
STANDARD 1H OBSERVE

```

exp1  s2pu1
=====
date  Jan 6 2009    temp  not used
solvent  Jan 6 2009    gain  not used
file  /export/home/~  spin  not used
nmr1/vnmrsvs/data/~  hst    0.008
/kerr/TPL-P-137/CA~ pw90   11.100
                        R80N.fid alfa  20.000
=====
ACQUISITION          FLAGS
sw  25125.6  l  n
at  1.199  in  n
np  60270  dp  y
fb  13800  hs  n
bs  64     lb  1.00
dl  1.000  fb  not used
nt  256    fn  not used
ct  64     sp  DISPLAY -2.0
=====
tn  TRANSMITTER C13  sp  18106.1
sfreq  100.611  wf  8274.1
rf  15526  rfp  774.2
tpwr  114.6  rp  114.6
pw  5.530  lp  -307.7
=====
dn  DECOUPLER H1  wc  250
dof  0  sc  90
dm  yyy  vs  8
dmm  w  th  40
dpwr  40  ai  no  ph
dmf  8900

```

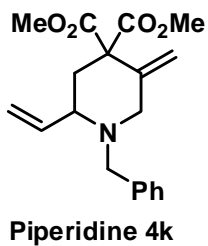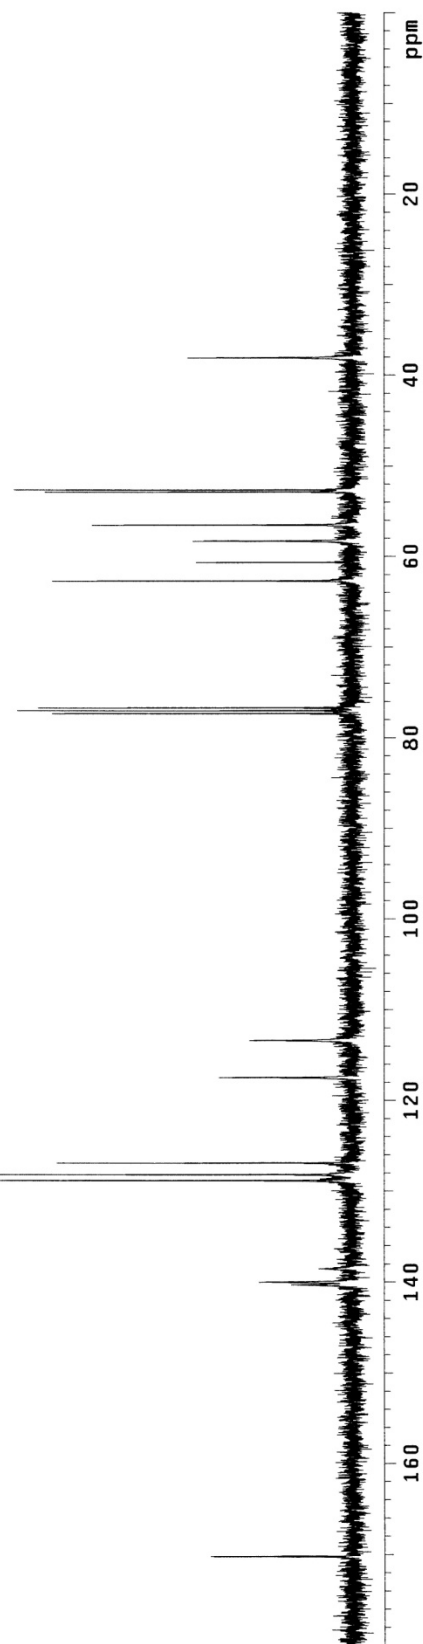

TPL-P-169-carb  
STANDARD 1H OBSERVE

exp3 szpul

| SAMPLE               |                | SPECIAL    |          |
|----------------------|----------------|------------|----------|
| date                 | Jan 12 2009    | temp       | not used |
| solvent              | cdcl3          | gain       | not used |
| file                 | /export/home/~ | spin       | 20       |
| nmr1/vmrsvs/data-    | bst            | 0.008      |          |
| /Kerr/TPL-P-169-car- | pw90           | 13.500     |          |
| rb/PROTON.fid        | alfa           | 20.000     |          |
| ACQUISITION          |                |            |          |
| sw                   | 6402.0         | fl         | n        |
| at                   | 4.000          | in         | n        |
| np                   | 51216          | dp         | y        |
| fb                   | not used       | hs         | nn       |
| bs                   | 16             | PROCESSING | nn       |
| d1                   | 1.000          | fn         | not used |
| nt                   | 8              | DISPLAY    |          |
| ct                   | 8              | SP         | -2.8     |
| TRANSMITTER          |                |            |          |
| tn                   | H1             | wp         | 3204.3   |
| rf1                  |                | rf1        | 800.5    |
| sfrq                 | 400.083        | rfp        | 0        |
| tof                  | 424.3          | rp         | -124.0   |
| tpwr                 | 58             | lp         | -146.9   |
| pw                   | 6.750          | WC         | 250      |
| DECOUPLER            |                |            |          |
| C13                  | sc             |            | 0        |
| dn                   | 0              | vs         | 46       |
| dm                   | nn             | th         | 54       |
| dam                  | C              | ai         | cdc      |
| dpr                  | 44             | ph         |          |
| dnf                  | 18500          |            |          |

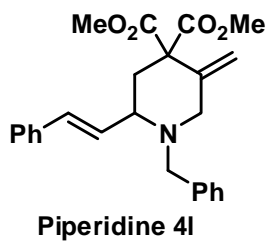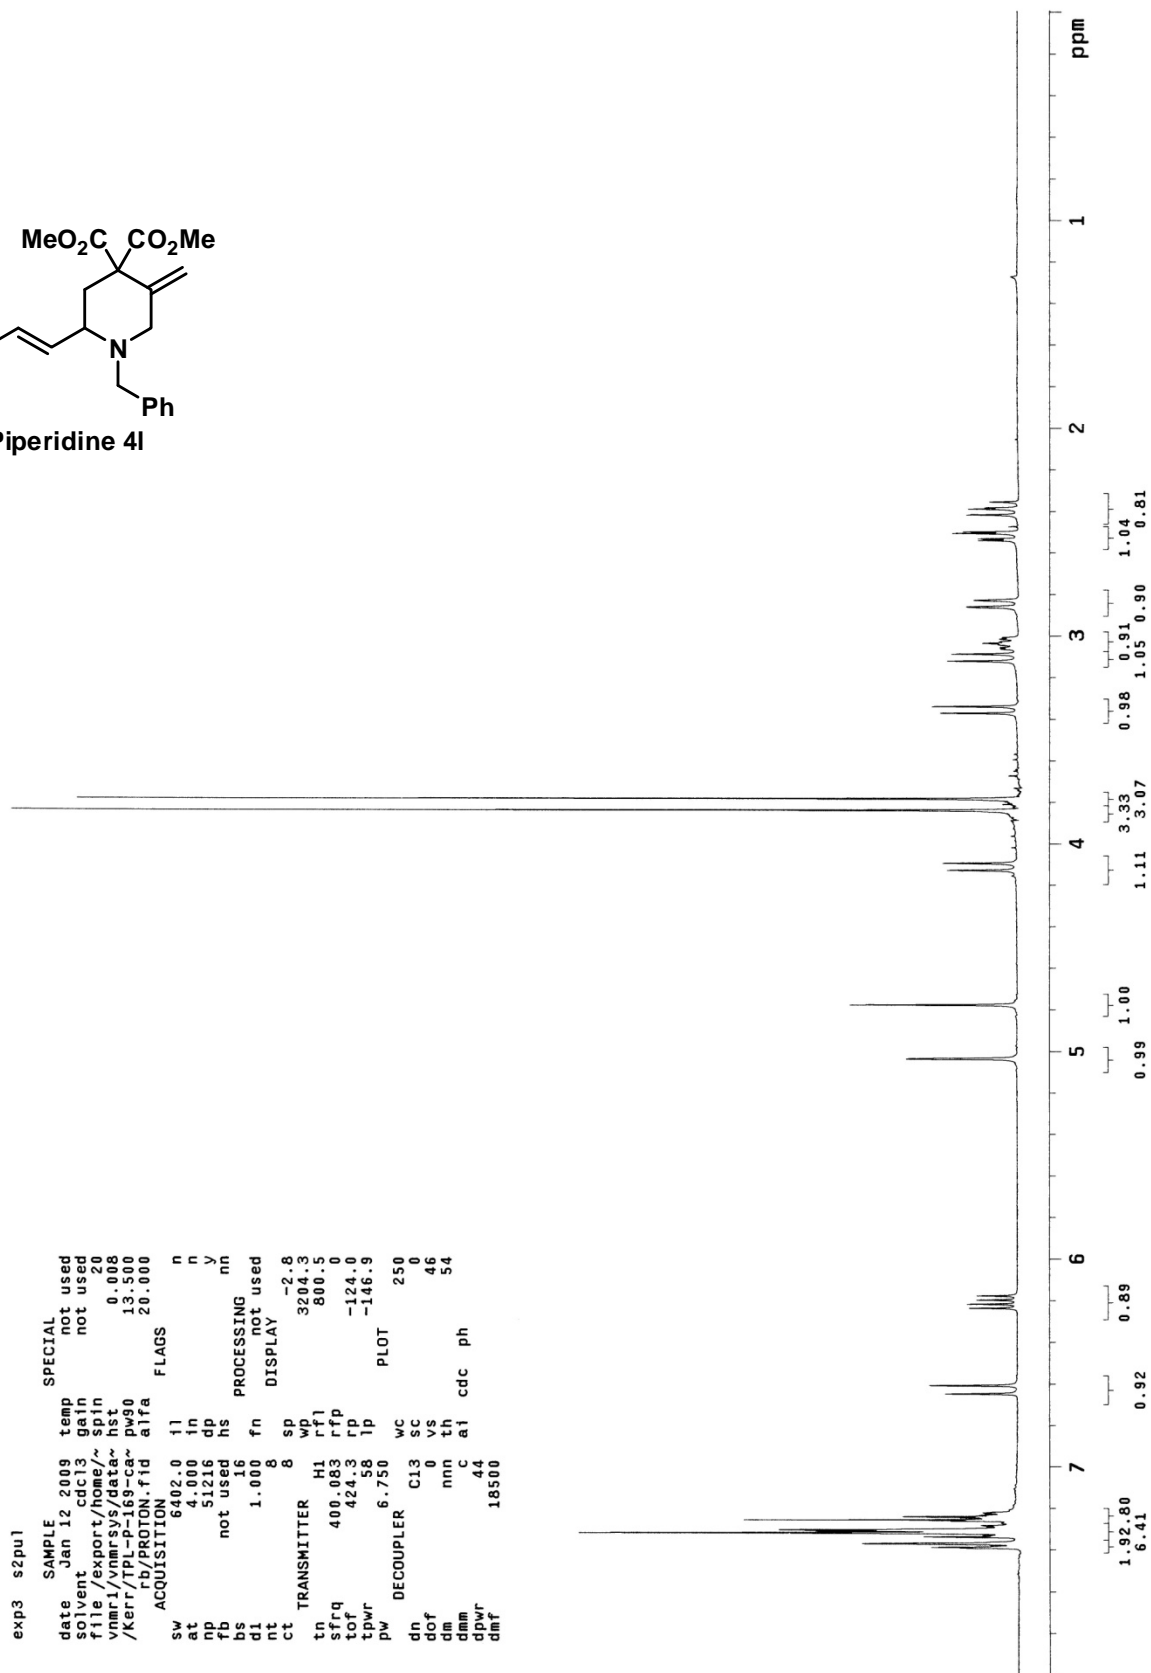

TPL-P-169-carb  
STANDARD 1H OBSERVE

exp3 s2pu1

|       |                |          |          |
|-------|----------------|----------|----------|
| date  | Jan 12 2009    | temp     | not used |
| file  | export/cdcl3   | gain     | not used |
| file  | export/hdata-  | not used |          |
| nmr   | vsrv/deta-     | pt       | not used |
| /kerr | /TPL-P-169-ca- | pw90     | 11.100   |
|       | rb/CARBON.fid  | alpha    | 20.000   |
|       |                | flags    |          |
| sw    | 25125.6        | l1       | n        |
| at    | 1.199          | in       | n        |
| np    | 60270          | dp       | y        |
| fb    | 13800          | hs       | nn       |
| bs    | 64             |          |          |
| d1    | 1.000          | lb       | 1.00     |
| nt    | 256            | fn       | not used |
| ct    | 128            |          | DISPLAY  |
|       |                | sp       | -4.3     |
| tn    | C13            | wp       | 18115.8  |
| sfrq  | 100.611        | rfl      | 9274.1   |
| tof   | 1552.6         | rpf      | 7746.2   |
| tpwr  | 59             | rp       | 108.3    |
| pw    | 5.550          | lp       | -353.9   |
|       |                |          | PLOT     |
| dn    | H1             | wc       | 250      |
| dof   | 0              | sc       | 0        |
| dm    | yyv            | vs       | 109      |
| dmm   | w              | th       | 8        |
| dpwr  | 40             | a1       | no       |
| dmy   | 8900           | ph       |          |

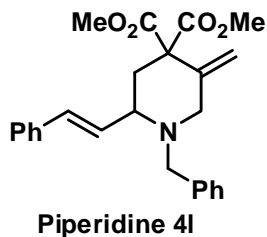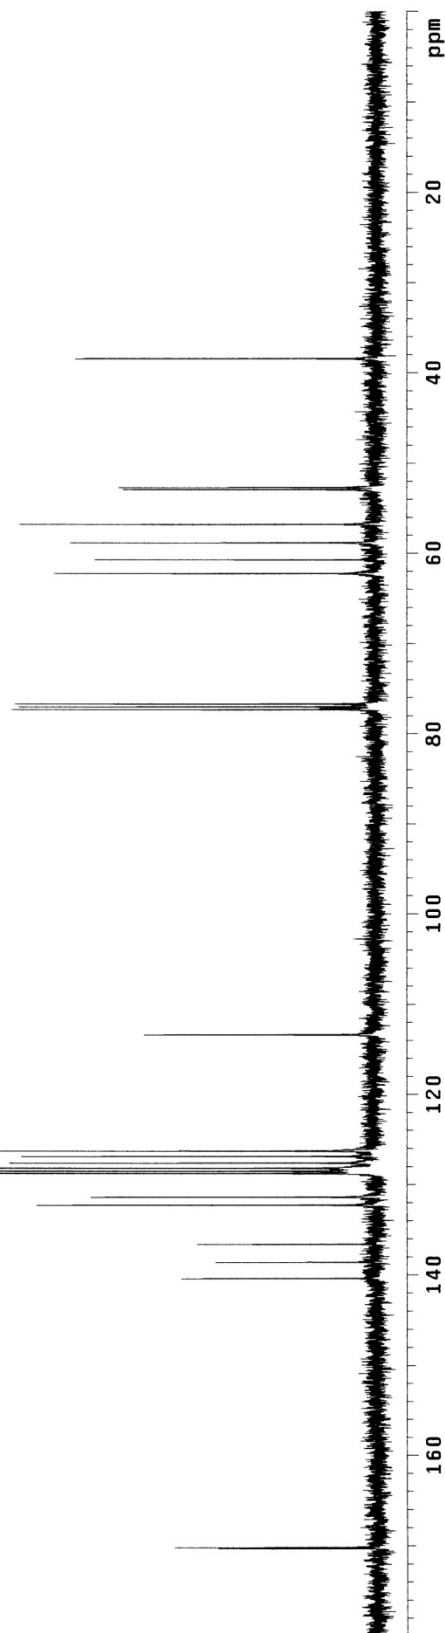



TPL-Q-55-2

```

exp1  PROTON
date   SAMPLE
Feb 24 2009
solvent cdc13
file   ACQUISITION exp
sw     6396.4
at     2.561
np     32768
fb     4000
bs     32
d1     1.000
nt     16
ct     16
tn     399.762
sfrq   399.8
tof     59
tpwr   4.750
pw     DECOUPLER C13
dn     0
dof     0
dm     nnn
decwave w40_hfcp2
dpwr   34
dmf    29412
wc     250
sc     0
vs     76
th     27
ai     cdc
ph     ph

```

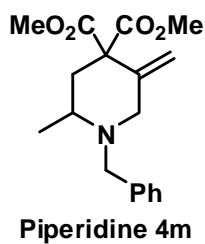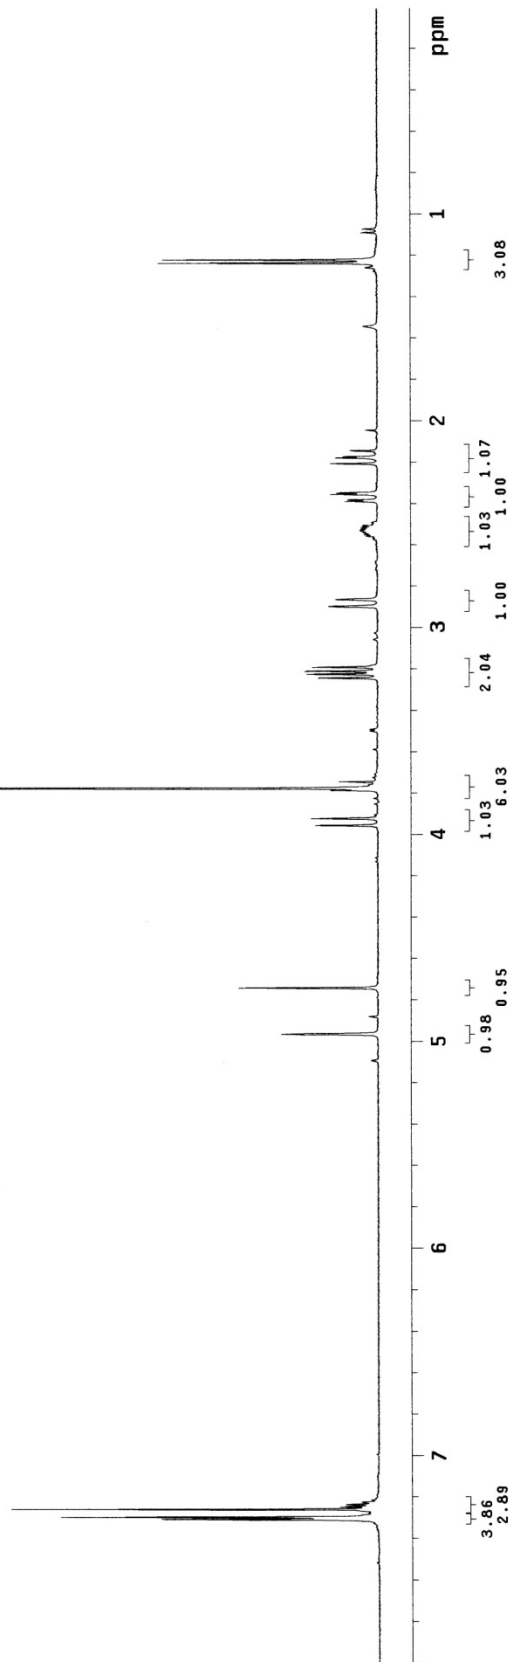

TPL-Q-55-carb

exp1 CARBON

|                     |                |          |            |
|---------------------|----------------|----------|------------|
| date                | Feb 24 2009    | satmode  | n          |
| solvent             | cdcl3          | wet      | n          |
| file                | /home/kerr/vn~ | SPECIAL  |            |
| mrsys/data/Terry/T~ | temp           | 25.0     |            |
| PL-Q-55-carb        | gain           | not used |            |
| -55-carb_01/CARBON~ | spin           | not used |            |
| 01.fid              | hst            | 0.008    |            |
| pw90                | 8.800          |          |            |
| sw                  | 25133.5        | alpha    | 10.000     |
| at                  | 1.304          | fl       | FLAGS      |
| np                  | 6536           | in       | n          |
| rb                  | 1400           | in       | n          |
| ds                  | 4              | dp       | y          |
| dl                  | 1.000          | hs       | PROCESSING |
| nt                  | 236            | lb       | 0.50       |
| ct                  | 36             | fn       | not used   |
| tn                  | TRANSMITTER    | C13      | DISPLAY    |
| sfrq                | 100.531        | sp       | 7.7        |
| tof                 | 1530.6         | wd       | 18082.4    |
| tpwr                | 4.400          | rfl      | 9252.5     |
| pw                  | DECOUPLER      | rfd      | 7740.0     |
| dn                  | H1             | lp       | 1.8        |
| dof                 | 0              | lp       | -308.7     |
| dm                  | YVY            | wc       | 250        |
| decwave             | w              | sc       | 0          |
| dpwr                | 39             | vs       | 121        |
| dmf                 | 9500           | th       | 68         |
|                     |                | nm       | cdc        |
|                     |                | ph       |            |

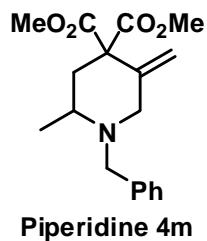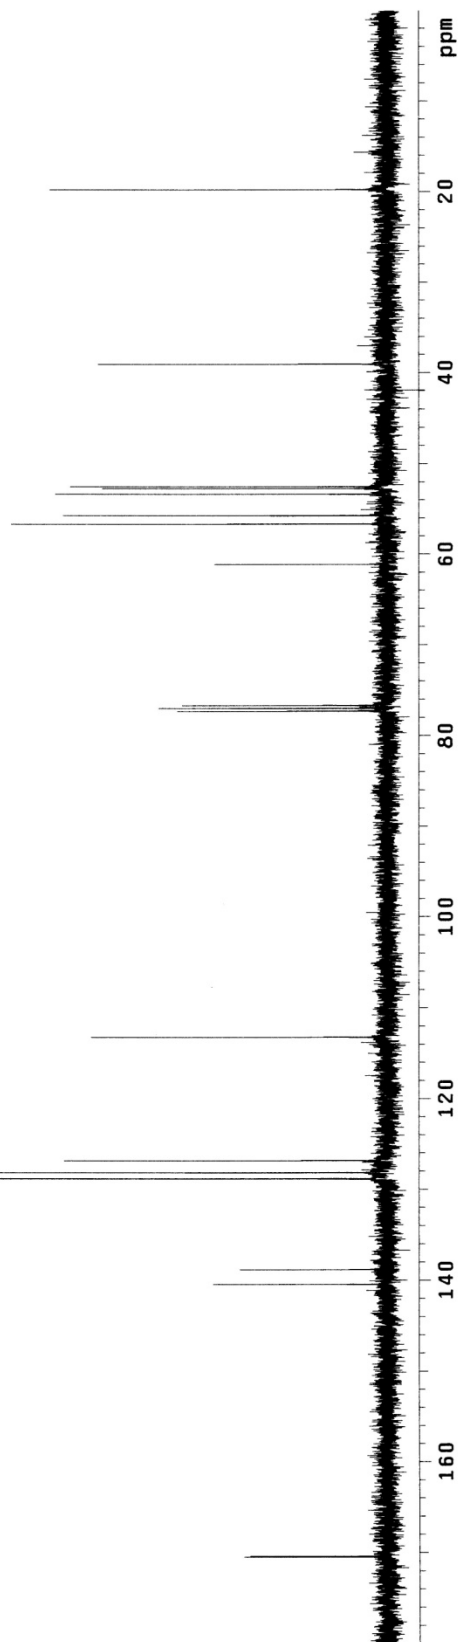

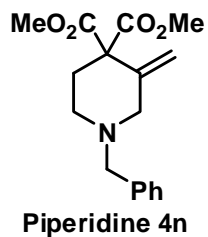

TPL-P-147-ag  
 STANDARD 1H OBSERVE

```

exp1 s2pu1
SAMPLE
date Jan 8 2009 temp not used
solvent cdc13 gain not used
file /export/home/~spin 20
nmr1/vnmrSYS/data~ hst 0.008
/kerr/TPL-P-147-ag~ pw90 13.500
/PROTON.fid alfa 20.000
ACQUISITION
sw 6402.0 ll n
at 4.000 tn n
np 51216 dp y
bs not used hs PROCESSING nn
ds 16 fn not used
dt 1.008 f1 DISPLAY
Ct 8 SP 1.7
tn TRANSMITTER H1 WD 3200.8
sfrq 400.083 rfl 800.5
tof 424.3 rfp -149.8
tpwr 58 lp -103.5
pw 6.750 PLOT
DECOUPLER C13 sc 250
dn 0 vs 21
dm nnn th 3
dmm C a1 cdc ph
dpwr 44
dmf 18500
  
```

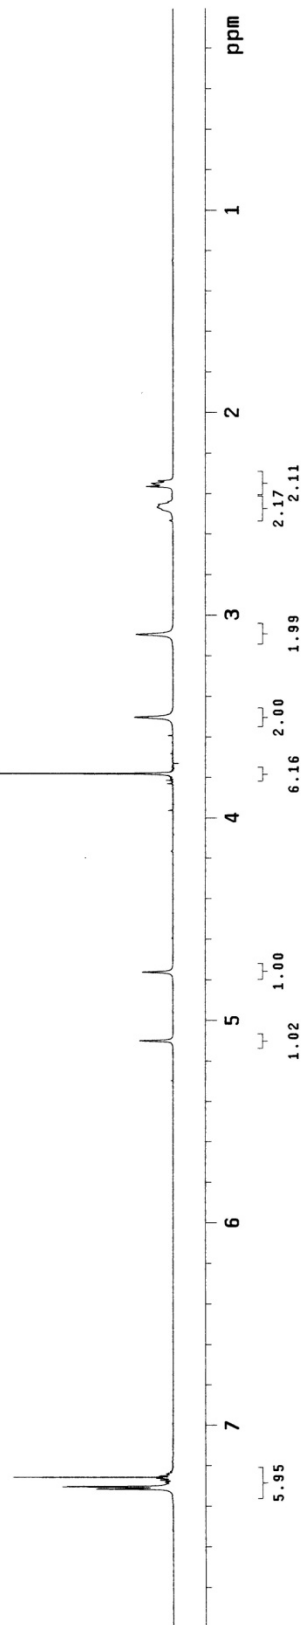

TPL-P-147-carb  
STANDARD 1H OBSERVE

```

exp1  s2pu1
SAMPLE
date   Jan  8 2009    temp  not used
solvent Jan  8 2009    gain  not used
file   /export/home/~h1n  not used
nmr1   /usr/local/nmr/0008
vnmr1  08-01-09/0217  p1a0  0.008
                                11.100
ACQUISITION
sw      25125.6  f1  a1fa  20.000
at      1.199  f1  n
np      60270  in  n
fb      13800  dp  v
bs      64     hs  n
d1      1.000  lb  PROCESSING  nn
nt      256    1.00
ct      64     fn  not used
                                1.00
TRANSMITTER C13 SP DISPLAY
tn      100.611  wp  18106.6  2.6
sfrq    1552.6  rfl  9274.9
tof     59     rfp  7746.2
tpwr    5.550  rfp  105.9
pw      5.550  lp  -323.3
DECOUPLER H1 PLOT
dn      0      wc  250
dof     0      sc  0
dm      yyy   vs  61
dmm     w     vs  61
dpwr    40    th  7
dmf     8900  a1  no ph

```

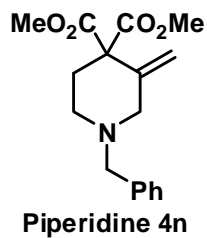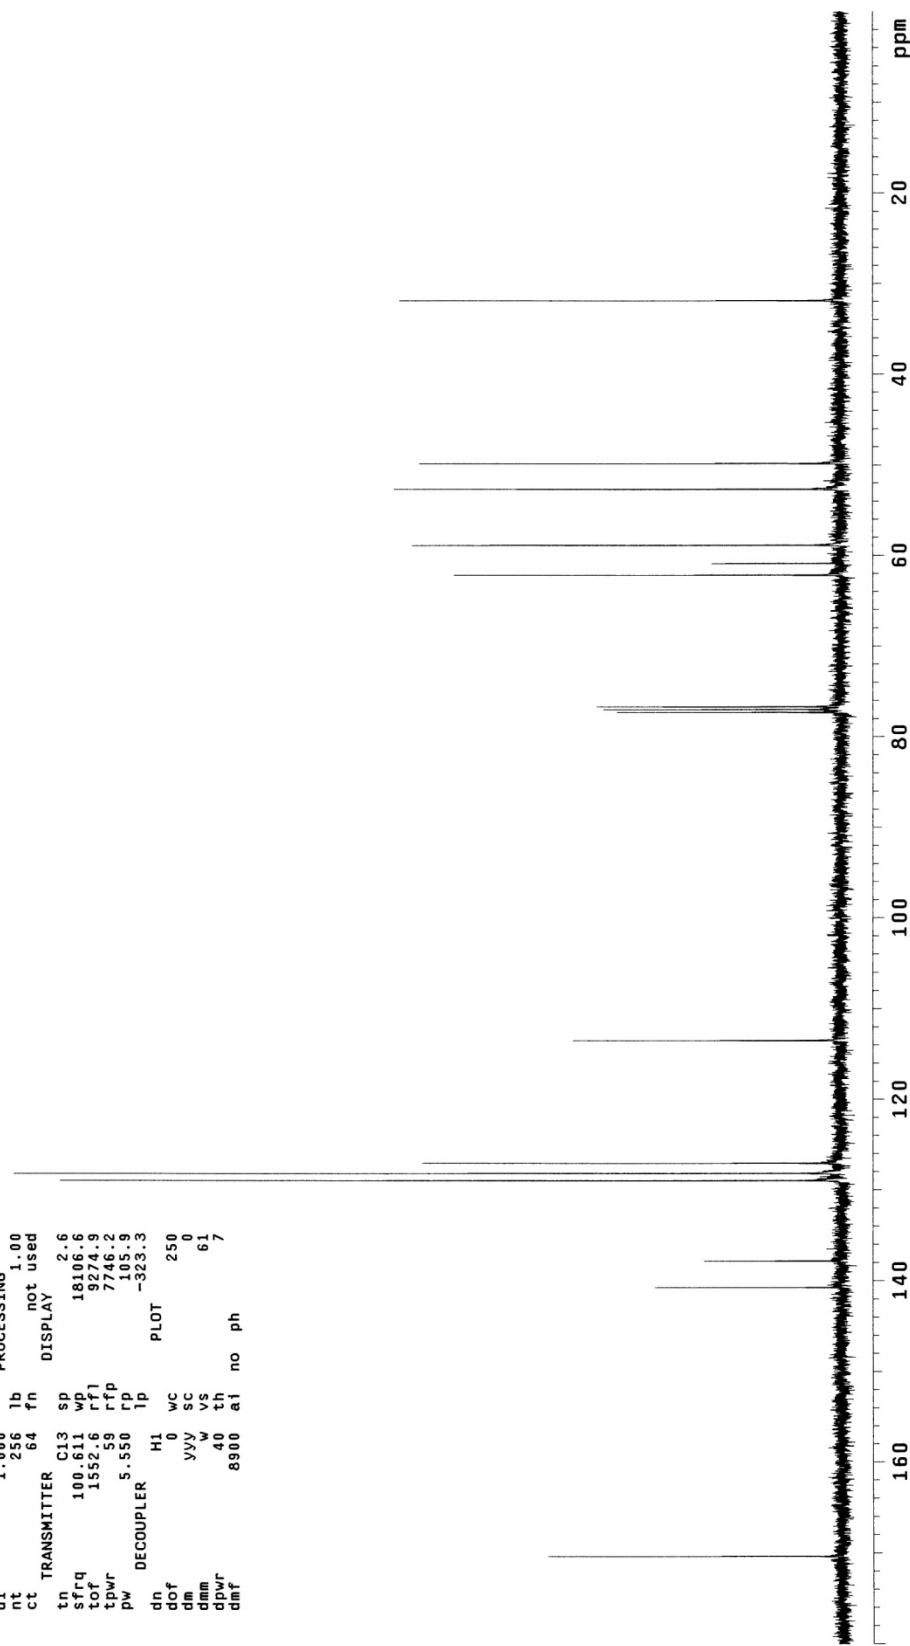

TPL-Q-49-agg

exp1 PROTON

|                     |                |               |         |
|---------------------|----------------|---------------|---------|
| date                | Feb 17 2009    | PRESATURATION | n       |
| solvent             | cdcl3          | satmode       | n       |
| file                | /home/kerr/vn~ | wet           | SPECIAL |
| mrsvs/data/Terrv/T~ | temp           | not used      | 26.0    |
| PL-Q-49-agg.TPL-Q-~ | gain           | 0.008         | 20      |
| 49-agg.01/PROTON03  | spin           | 9.500         | 6.600   |
| ACQUISITION         | hst            | 0.008         | 6.600   |
| sw                  | 6395.9         | pw90          | 6.600   |
| at                  | 2.562          | alpha         | 6.600   |
| np                  | 32768          | fl            | 6.600   |
| fb                  | 4000           | in            | 6.600   |
| bs                  | 4              | in            | 6.600   |
| d1                  | 1.000          | dp            | 6.600   |
| nt                  | 64             | hs            | 6.600   |
| ct                  | 64             | fn            | 6.600   |
| TRANSMITTER         | H1             | not used      | 6.600   |
| tn                  | 399.762        | sp            | 6.600   |
| sfrq                | 399.762        | wp            | 6.600   |
| tof                 | 399.8          | rf1           | 6.600   |
| tpwr                | 59             | rfp           | 6.600   |
| pw                  | 4.750          | rfp           | 6.600   |
| DECOUPLER           | C13            | lp            | 6.600   |
| dn                  | 0              | plot          | 6.600   |
| dof                 | nnn            | wc            | 6.600   |
| dm                  | nnn            | sc            | 6.600   |
| decwave             | w40_hfcp2      | vs            | 6.600   |
| dpwr                | 34             | th            | 6.600   |
| dmf                 | 29412          | at            | 6.600   |
|                     |                | cdc           | 6.600   |
|                     |                | ph            | 6.600   |

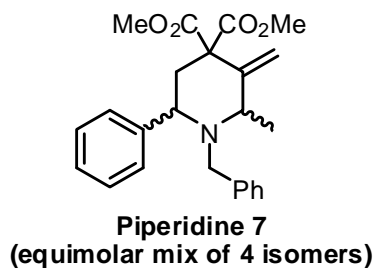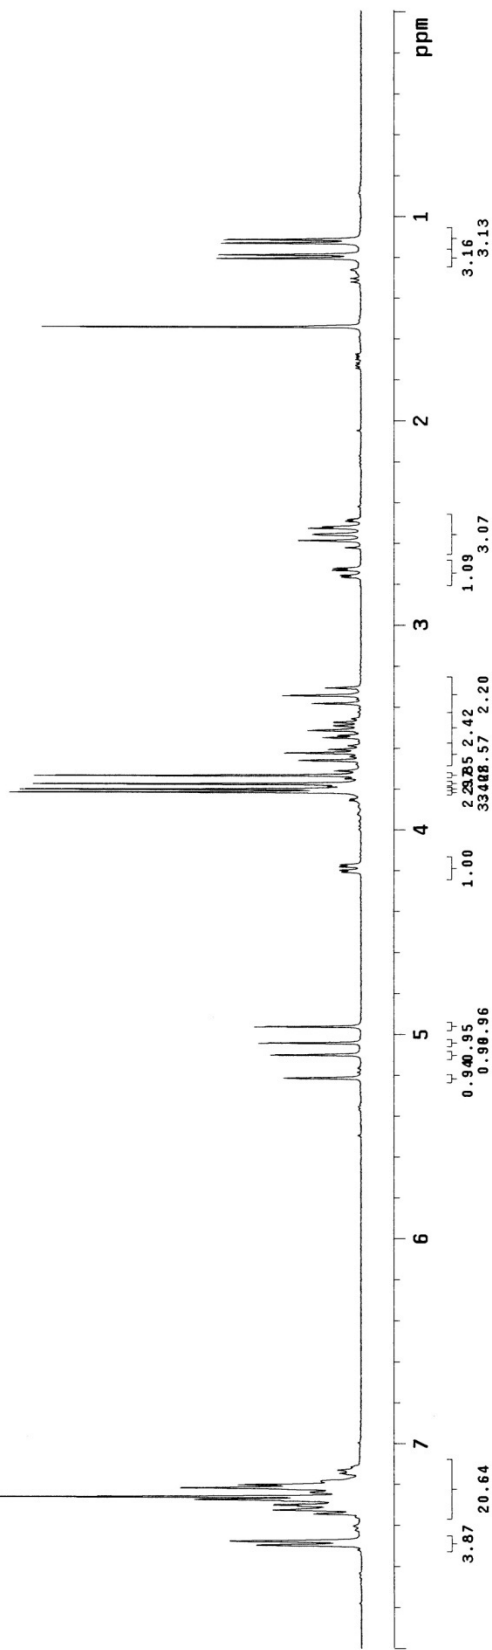

TPI-Q-207  
STANDARD 1H OBSERVE

```

exp1 s2pul
SAMPLE
date Apr 14 2009 temp not used
solvent cdcl3 gain not used
file/export/home/~ spin 20
nmr1/wakeup/auto~ hst 0.008
14.04.09/0123 pw90 13.800
ACQUISITION alfa 20.000
sw 6402.0
at 4.000 il n
np 51216 in n
fb not used dp v
bs 16 hs
d1 1.000
ct 8 fn not used
nm PROCESSING
ct 8 DISPLAY
TRANSMITTER H1 SP -0.1
tn wp 3196.5
sfrq 400.083 rf1 3703.9
tof 424.3 rfp 2904.6
tpwr 58 tp -151.9
pw 6.900 lp -95.3
DECOUPLER C13 WC 250
dn 0 SC 0
dm nnn vs 40
dmm c th 54
dpwr 44 ai cdc ph
dmt 18500
  
```

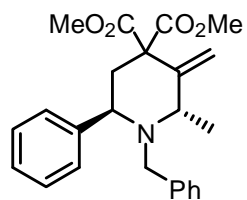

Piperidine 7(2S,6R)

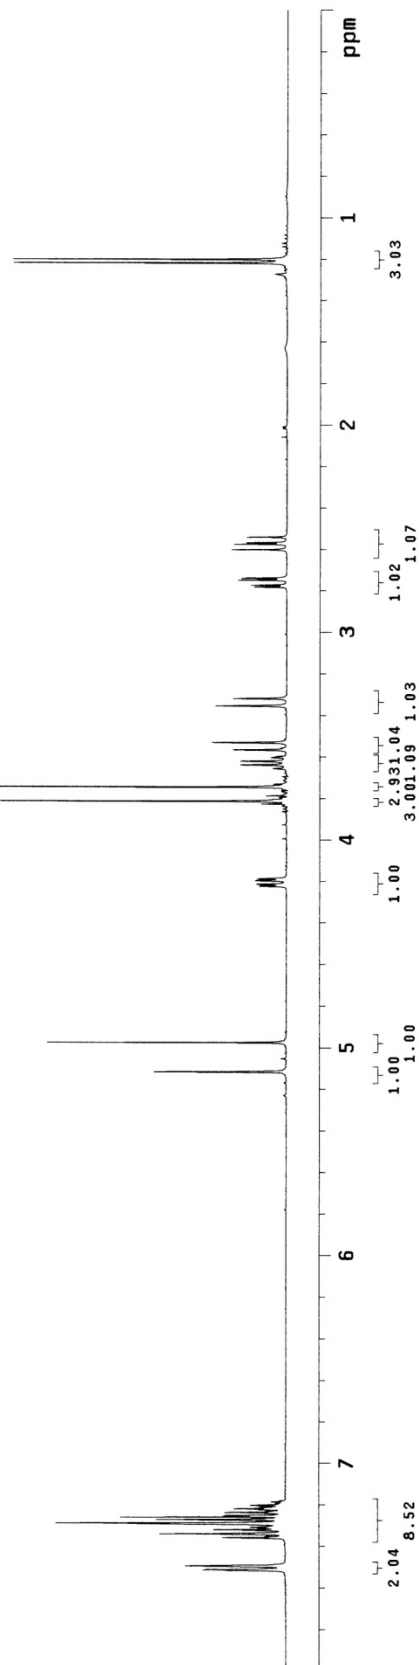

TPL-Q-207  
STANDARD 1H OBSERVE

```

exp1 s2pu1
SAMPLE
date Apr 14 2009 temp not used
solvent cdcl3 gain not used
file/export/home/~ spin not used
vnmr1/walkup/autoc~ hst 0.008
14.04.09/0124 pw90 12.600
ACQUISITION alfa 20.000
sw 25125.6
at 1.199 l1 n
np 60270 in n
fb 13800 dp y
bs 64 hs nn
d1 1.000
nt 256 lb 1.00
ct 128 fn not used
TRANSMITTER C13 sp -5.9
tn 100.611 wp 18125.0
sfrq 1552.6 rf1 9271.1
tpwr 59 rfp 7746.2
pw 6.300 rp 116.8
DECOUPLER H1 lp -283.7
dn 0 wc 250
dof yvy sc 0
dm w vs 121
dmm 42 tn no ph
dmf 11100 at

```

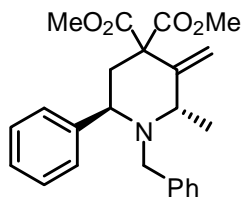

Piperidine 7(2S,6R)

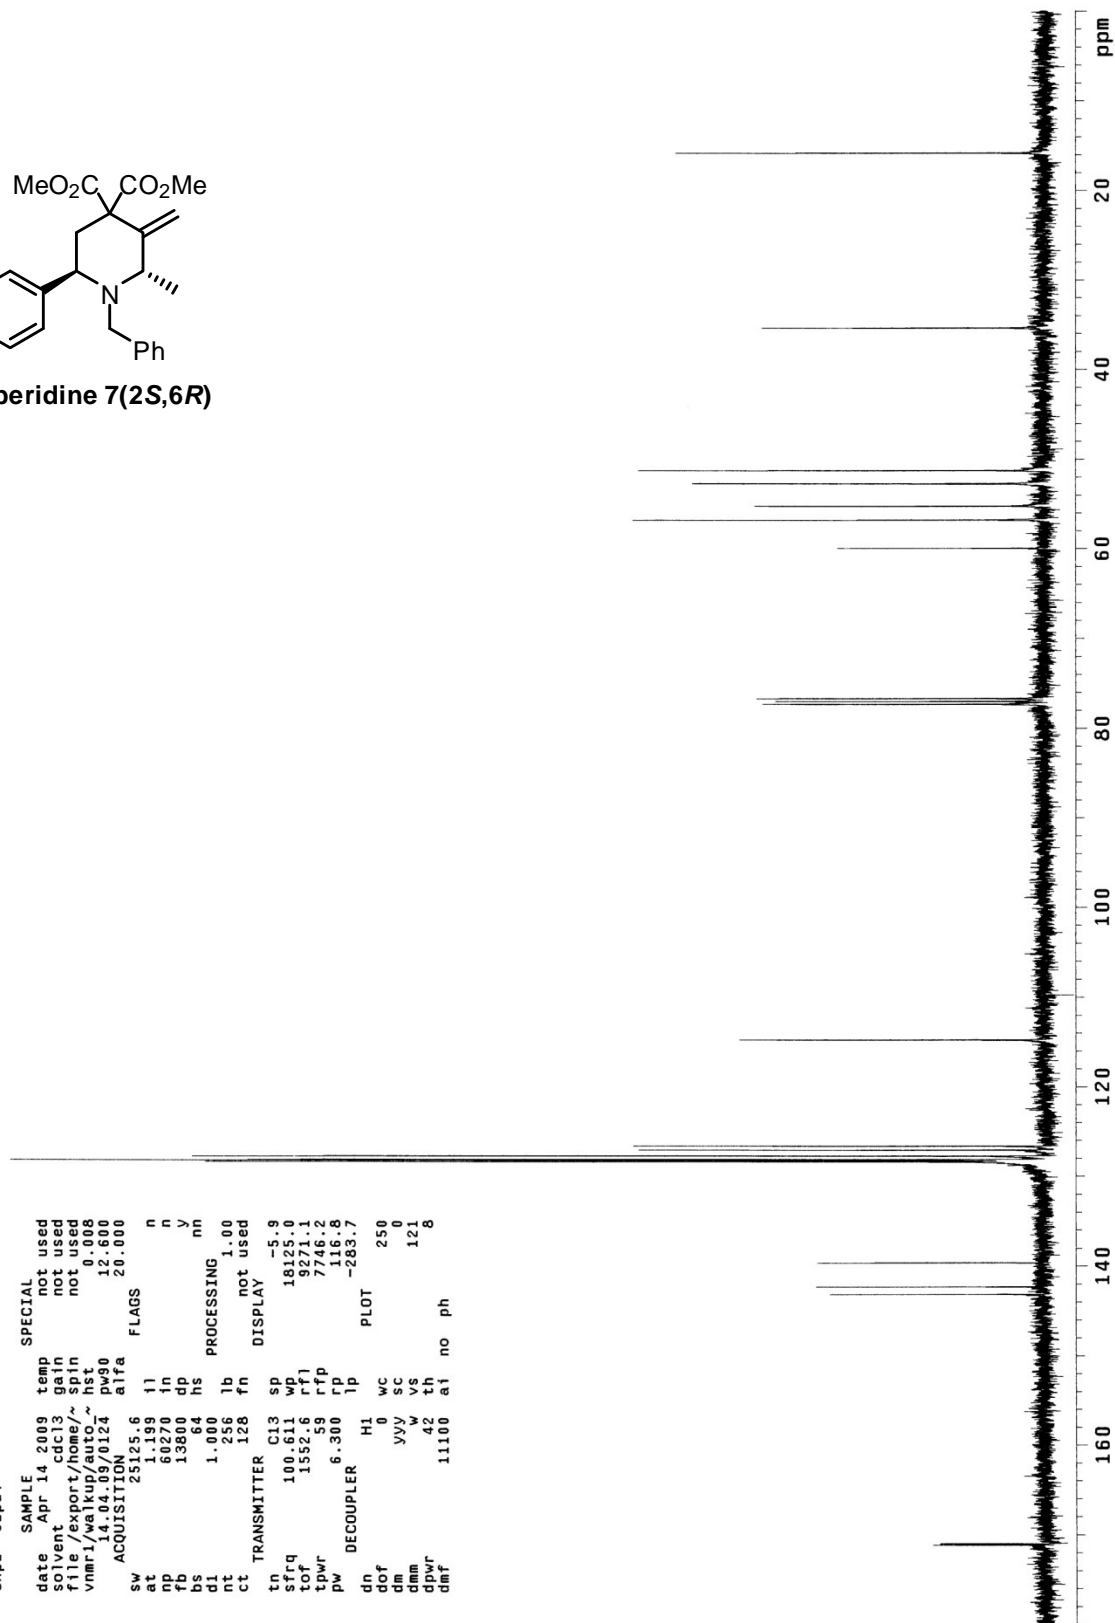

TPL-Q-199  
STANDARD 1H OBSERVE

```

exp1  s2pu1
SAMPLE
date   Apr 11 2009    temp not used
solvent cdc13        gain not used
file    /export/home/~ spin 0.20
nmr1/walkup/autoc~ hst 0.008
11.04.09/0202~ pw90 13.800
ACQUISITION 2.000 a1ra FLADS 20.000
sw      6402.0      il      n
at      45000      in      n
ap      51248      in      n
pe      not used   dp      y
bs      1.000      te      y
d1      1.000      fn      not used
nt      8          DISPLAY
ct      8          SP      -0.1
tn      H1         wp      3196.7
sfrq    400.083    rfl      3703.9
tof      424.3     rfp      2904.6
tpwr     58        rp      -159.2
pw      6.900     lp      -89.3
DECOUPLER C13      wc      250
dn        0        sc      0
dof       0        vs      77
dm        0        th      54
dmm       44      ai      cdc
dpwr      18500    ph
dmf
  
```

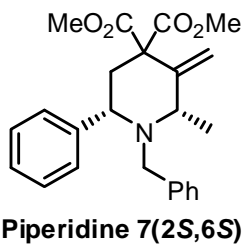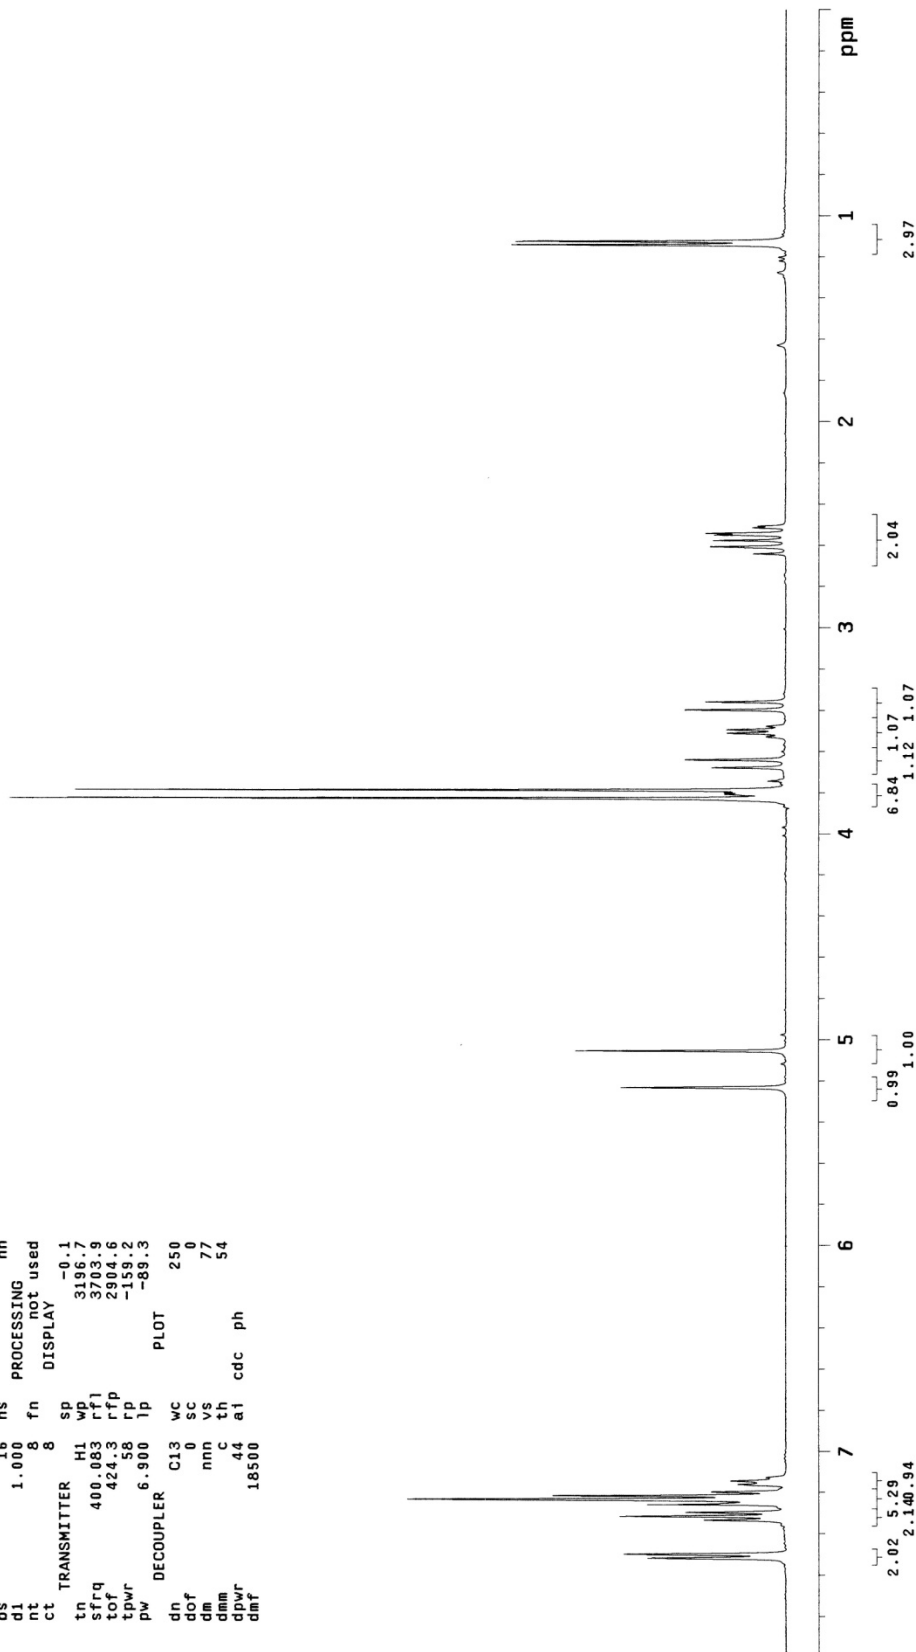



TPL-Q-199  
STANDARD 1H OBSERVE

```

exp1 s2pul
SAMPLE
date Apr 11 2009 temp not used
solvent cdcl3 gain not used
file /export/home/~ hst not used
nmr1/valkup/auto/~ hst 0.008
11.04.05/0203 pw90 12.600
ACQUISITION a1fa 26.000
SW 25125.6 FLAGS
at 1.199 il n
np 60270 in n
fb 13800 dp y
bs 64 hs nn
d1 1.000 PROCESSING
nt 256 lb 1.00
ct 64 fn not used
DISPLAY
TRANSMITTER C13 sp -5.9
tn 100.611 wp 18107.4
sfrq 1552.6 rfl 9272.6
tof 59 rfp 7746.2
tpwr 6.300 rp 115.0
pw DECOUPLER lp -309.7
dn H1 PLOT
dn dof 0 wc 250
dm yyv sc 0
dmm w vs 79
dpwr 42 th 8
dnt 11100 ai no ph

```

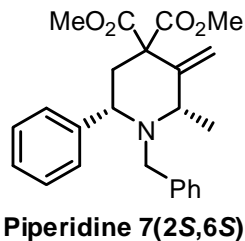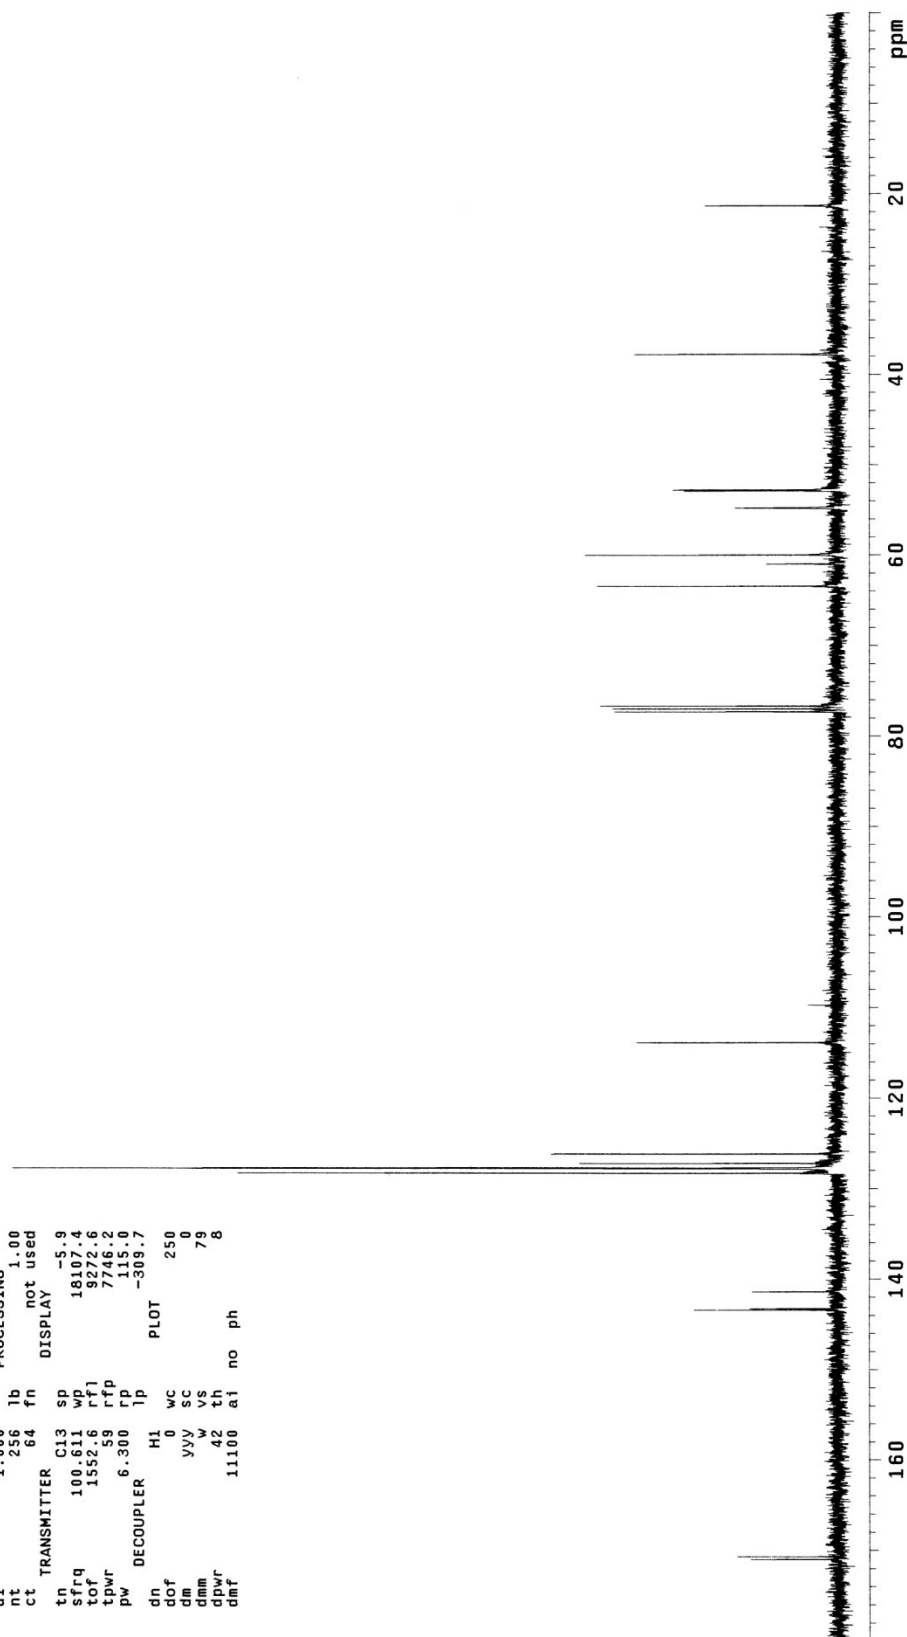

TPL-R-33-ag9  
STANDARD 1H OBSERVE

exp3 s2pu1

|               |                |        |          |         |
|---------------|----------------|--------|----------|---------|
| date          | Apr 30 2009    | temp   | not used | SPECIAL |
| solvent       | cdcl3          | gain   | not used |         |
| file          | /export/home/~ | spin   | 20       |         |
| nmr1          | walnut/autoc~  | hst    | 0.008    |         |
| 30.04.09/0120 | pw90           | 13.800 |          |         |
| ACQUISITION   | alif           | 20.000 |          |         |
| sw            | 6402.0         | il     | FLAGS    |         |
| at            | 4.000          | in     | n        |         |
| np            | 51216          | dp     | y        |         |
| fb            | not used       | hs     | nn       |         |
| bs            | 16             | fn     | not used |         |
| dl            | 1.000          | sp     | DISPLAY  |         |
| nt            | 8              | tp     | 1.5      |         |
| ct            | TRANSMITTER    | wf     | 3186.9   |         |
| tn            | H1             | rf     | 3784.3   |         |
| sf            | 400.083        | rfp    | 2984.6   |         |
| tof           | 424.3          | p      | -188.2   |         |
| tpwr          | 58             | lp     | -83.7    |         |
| pw            | 6.900          | plot   |          |         |
| DECOUPLER     | C13            | wc     | 250      |         |
| dn            | 0              | sc     | 0        |         |
| dof           | nnn            | vs     | 16       |         |
| dm            | c              | th     | 3        |         |
| dmm           | 44             | al     | cdc      | ph      |
| dpwr          |                |        |          |         |
| dmf           | 18500          |        |          |         |

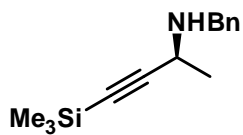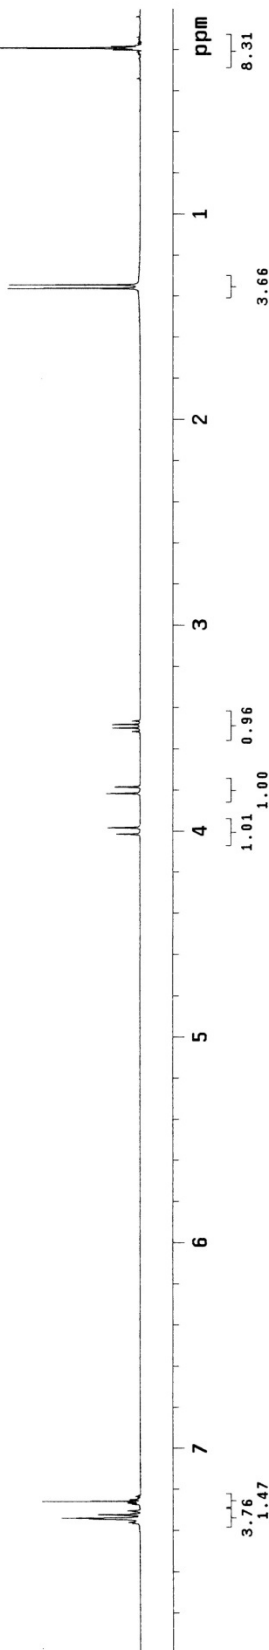

TPL-R-33-28  
STANDARD 1H OBSERVE

```

exp3  szpul
SAMPLE
date   Apr 30 2009    temp    not used
solvent cdc13         gain    not used
file   /export/home/~ spin    not used
nmr1/walkup/auto/~ hst      0.008
30.04.09/0214 pw90      12.600
ACQUISITION alfa      20.000
sw      25125.6      FLAGS
at      1.199      fl      n
np      60270      in      n
fb      13800      dp      y
bs      64      hs      nn
dl      1.000      nt      1.00
nt      256      lb      not used
ct      256      fn      not used
PROCESSING
TRANSMITTER C13 sp      -1012.6
tn      100.611      wp      19104.9
sfrq      1552.6      rf1      9268.0
tof      59      rfp      7746.2
tpwr      6.300      rp      112.0
pw      DECOUPLER      lp      -283.2
dn      H1      PLOT
dof      0      wc      250
dm      yvy      sc      0
dmm      w      vs      102
dpwr      42      th      6
dnt      11100      al      no      ph

```

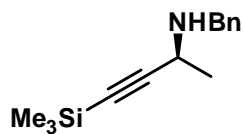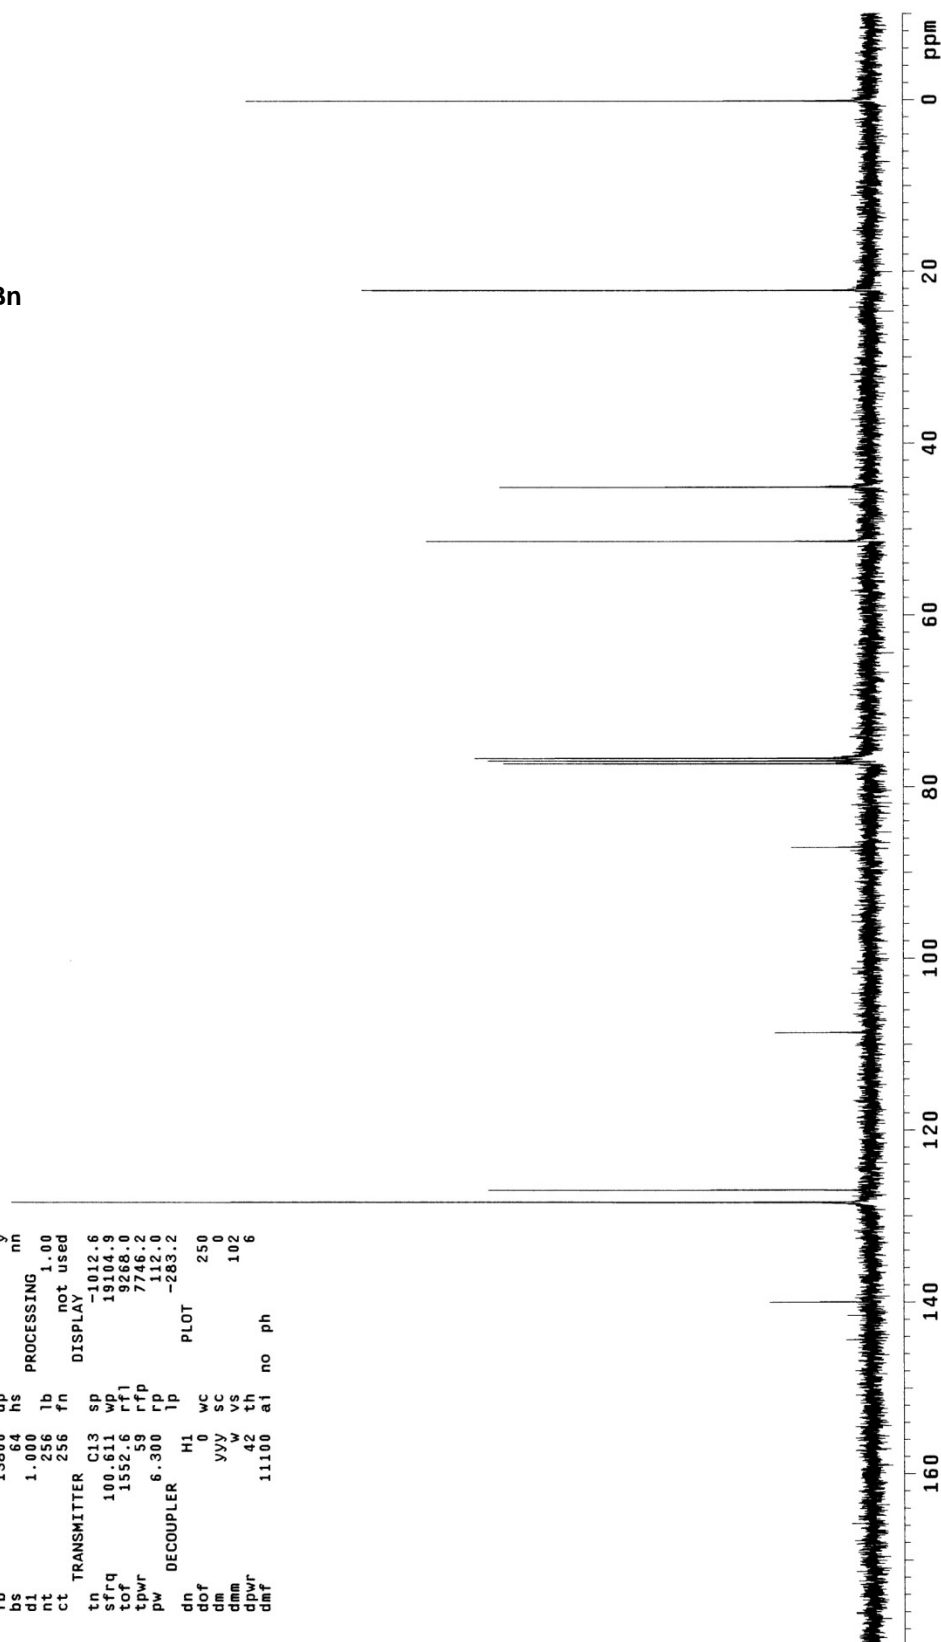

TPL-R-35-carbon  
STANDARD 1H OBSERVE

exp3 s2pu1

| SAMPLE              |                | SPECIAL |          |
|---------------------|----------------|---------|----------|
| date                | May 4 2009     | temp    | not used |
| solvent             | cdcl3          | gain    | not used |
| file                | /export/home/~ | spin    | 20       |
| nmr1/vnmrsvs/data/~ | hst            | 0.008   |          |
| /Kerr/TPL-R-35-car~ | pw90           | 13.800  |          |
| bon/PROTON.fid      | alfa           | 20.000  |          |
| ACQUISITION         |                | FLAGS   |          |
| sw                  | 6402.0         | il      | n        |
| at                  | 4.000          | in      | n        |
| np                  | 51216          | dp      | y        |
| fb                  | not used       | hs      | nn       |
| bs                  | 16             |         |          |
| di                  | 1.000          | fn      | not used |
| nt                  | 8              |         |          |
| ct                  | 8              | sp      | -0.3     |
| tn                  | 3196.5         | wp      | 3704.1   |
| sfreq               | 400.083        | rfl     | 2904.6   |
| tof                 | 424.3          | rfp     | -163.5   |
| tpwr                | 58             | lp      | -87.0    |
| pw                  | 6.900          |         |          |
| DECOUPLER           |                | WC      | 250      |
| dn                  | C13            | SC      | 0        |
| dof                 | 0              | VS      | 40       |
| dm                  | nnn            | th      | 54       |
| dmm                 | c              | ai      | cdc      |
| dpwr                | 44             |         | ph       |
| dmf                 | 18500          |         |          |

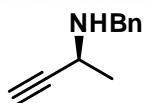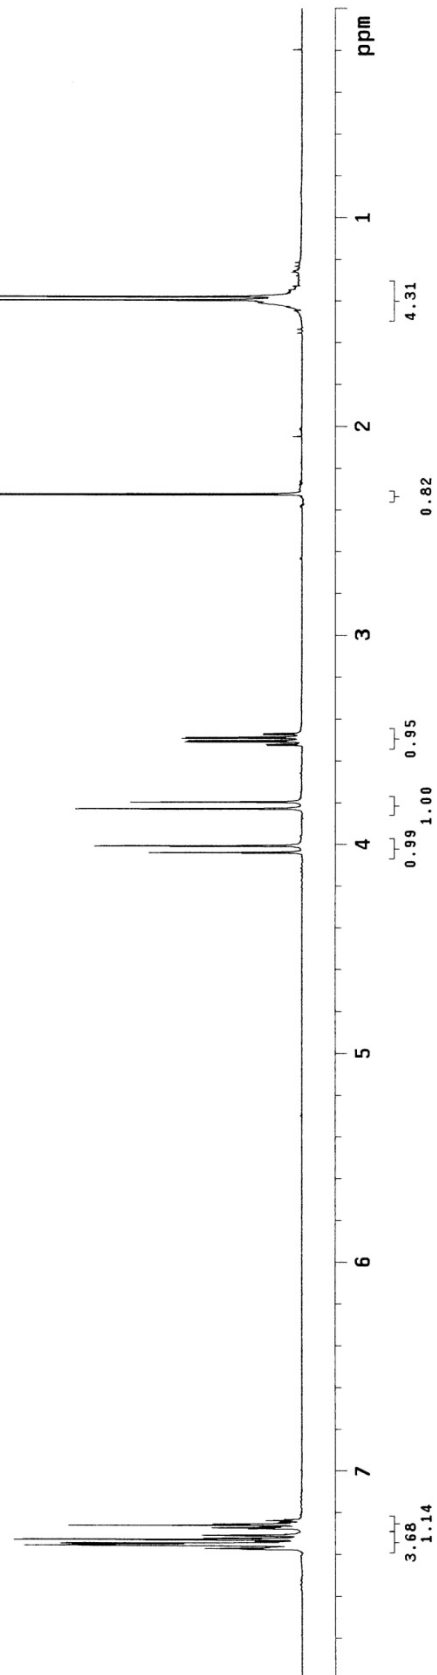

TPL-R-35-carbon  
STANDARD 1H OBSERVE

exp3 s2pu1

| SAMPLE              |                | SPECIAL |          |
|---------------------|----------------|---------|----------|
| date                | May 4 2009     | temp    | not used |
| solvent             | cdc13          | gain    | not used |
| file                | /export/home/~ | spin    | not used |
| nmr1/vnmrSYS/data/~ | hst            | 0.008   |          |
| /Kerr/TPL-R-35-car~ | pw90           | 12.600  |          |
| bon/CARBON.fid      | alfa           | 20.000  |          |
| ACQUISITION         |                |         |          |
| sw                  | 25125.6        | fl      | n        |
| at                  | 1.199          | in      | n        |
| np                  | 60270          | dp      | y        |
| fb                  | 13800          | hs      | nn       |
| bs                  | 64             |         |          |
| di                  | 1.000          | lb      | 1.00     |
| nt                  | 1000           | fn      | not used |
| ct                  | 832            | display | -1.3     |
| TRANSMITTER         |                |         |          |
| tn                  | c13            | wp      | 18082.0  |
| strq                | 100.611        | rfl     | 9266.5   |
| tor                 | 1352.6         | rfp     | 7746.2   |
| tpwr                | 59             | rp      | 111.1    |
| pw                  | 6.300          | lp      | -303.0   |
| DECOUPLER           |                |         |          |
| dn                  | H1             | wc      | 250      |
| dof                 | 0              | sc      | 0        |
| dm                  | yyv            | vc      | 334      |
| dmm                 | 42             | th      | 11       |
| dpr                 | 42             | at      | no       |
| dpr                 | 11100          | ph      |          |

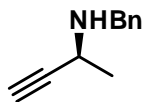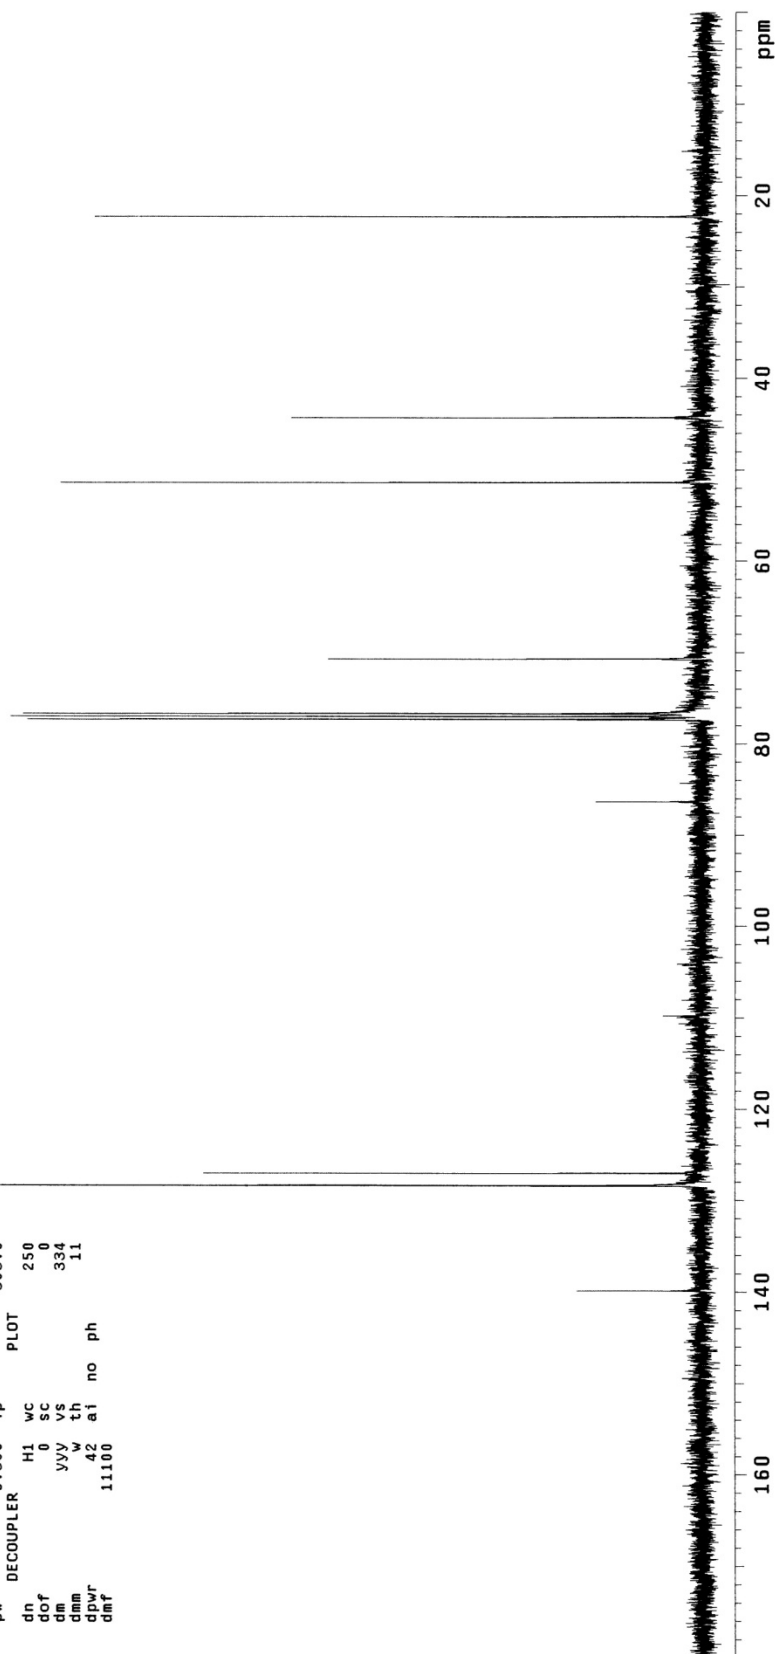

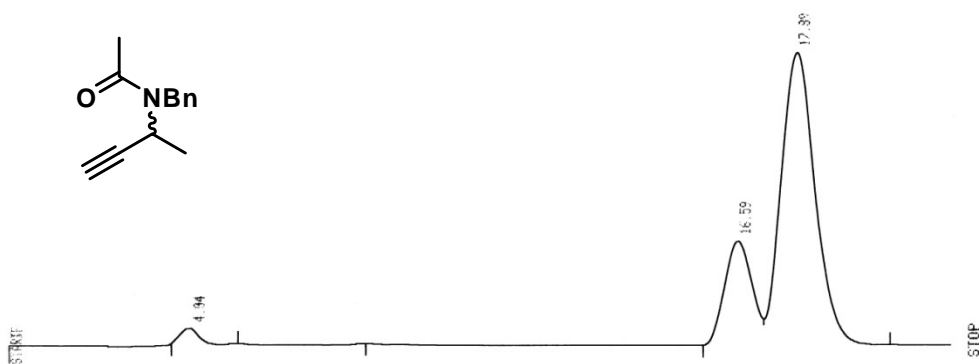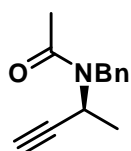

RUN # 12

| AREA% | RT    | AREA   | TYPE | AR/HT | AREA%  |
|-------|-------|--------|------|-------|--------|
| 4.85  | 4.85  | 5413   | PB   | 0.492 | 2.362  |
| 17.83 | 17.83 | 389186 | PB   | 0.855 | 97.638 |

TOTAL AREA= 394600  
MUL FACTOR= 1.0000E+00

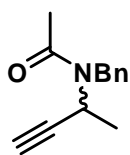

RUN # 13

| AREA% | RT    | AREA   | TYPE | AR/HT | AREA%  |
|-------|-------|--------|------|-------|--------|
| 4.94  | 4.94  | 12676  | BB   | 0.485 | 2.394  |
| 16.39 | 16.39 | 112768 | PV   | 0.731 | 22.095 |
| 17.39 | 17.39 | 398928 | VB   | 0.887 | 75.501 |

TOTAL AREA= 528350  
MUL FACTOR= 1.0000E+00
